# Supplementary material for: Palladium-catalyzed dehydrogenative coupling of terminal alkynes with secondary phosphine oxides
Source: Royal Society of Chemistry journal article supplement (doi:10.1039/c4cc09567g), 2015-01-01

## Supporting Information

### Palladium-Catalyzed Dehydrogenative Coupling of Terminal Alkynes with Secondary Phosphine Oxides

Jia Yang,<sup>a</sup> Tieqiao Chen,<sup>\*a</sup> Yongbo Zhou,<sup>a</sup> Shuang-Feng Yin<sup>a</sup> and Li-Biao Han<sup>\*ab</sup>

<sup>a</sup>State Key Laboratory of Chemo/Biosensing and Chemometrics, College of Chemistry and Chemical Engineering, Hunan University, Changsha 410082, China, and <sup>b</sup>National Institute of Advanced Industrial Science and Technology (AIST), Tsukuba, Ibaraki 305-8565, Japan

[chentieqiao@hnu.edu.cn](mailto:chentieqiao@hnu.edu.cn); [libiao-han@aist.go.jp](mailto:libiao-han@aist.go.jp)

### General information

Reactions for the synthesis of metal intermediates were conducted in a glove box ( $O_2 < 0.1$  ppm,  $H_2O < 0.1$  ppm). All other reactions were carried out in oven-dried Schlenk tubes under  $N_2$  atmosphere. Dry solvents were obtained by purification according to standard methods. Reagents were used as received unless otherwise noted.  $^1H$  NMR,  $^{13}C$  NMR and  $^{31}P$  NMR data were obtained on a Bruker-400 spectrometer (400 MHz for  $^1H$ , 100 MHz for  $^{13}C$ , and 162 MHz for  $^{31}P$  NMR spectroscopy). Mass spectra were measured on a Shimadzu GCMS-QP2010 Plus spectrometer (EI). HRMS were conducted in the Analytical Center at Hunan University, China.

### General procedure

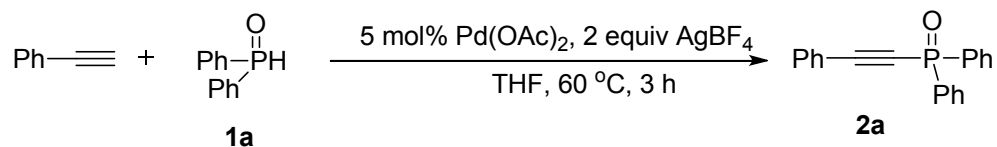

Under  $N_2$  atmosphere, 0.2 mmol diphenylphosphine oxide, 0.2 mmol phenylacetylene, 5 mol%  $\text{Pd(OAc)}_2$ , 0.4 mmol  $\text{AgBF}_4$  and 0.5 mL THF were charged into a 10 mL schlenck tube, and the mixture was stirred at 60  $^\circ\text{C}$  for 3 h. Then 1 mL  $\text{Et}_3\text{N}$  was added. After removal of the volatiles, the residues were passed through a short silica chromatography (particle size 37–54  $\mu\text{m}$ , pether/ethyl acetate as eluent) to afford analytically pure

alkynylphosphorus compounds **2**.

### Characterization data of **2**

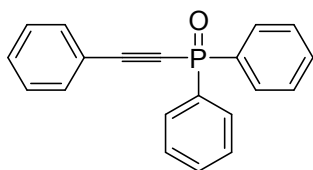

Following general procedure (60 °C, 3 h), **2a** was isolated as a yellow solid. <sup>1</sup>H NMR (400 MHz, CDCl<sub>3</sub>) δ 7.88–7.94 (m, 4H), 7.43–7.61 (m, 9H), 7.38 (t, 2H, *J* = 7.2 Hz); <sup>31</sup>P NMR (162 MHz, CDCl<sub>3</sub>) δ 8.34; <sup>13</sup>C NMR (100 MHz, CDCl<sub>3</sub>) δ 133.06 (d, *J*<sub>P-C</sub> = 121.4 Hz), 132.56 (d, *J*<sub>P-C</sub> = 1.7 Hz), 132.28 (d, *J*<sub>P-C</sub> = 2.7 Hz), 131.00 (d, *J*<sub>P-C</sub> = 11.2 Hz), 130.74, 128.69 (d, *J*<sub>P-C</sub> = 13.4 Hz), 128.60, 119.96 (d, *J*<sub>P-C</sub> = 3.9 Hz), 105.47 (d, *J*<sub>P-C</sub> = 29.8 Hz), 82.88 (d, *J*<sub>P-C</sub> = 169.4 Hz). MS (EI): 302.

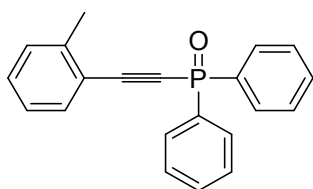

Following general procedure (60 °C, 6 h), **2b** was isolated as a white solid. m.p.: 92–93 °C. <sup>1</sup>H NMR (400 MHz, CDCl<sub>3</sub>) δ 7.89–7.95 (m, 4H), 7.48–7.57 (m, 7H), 7.34 (t, 1H, *J* = 7.2 Hz), 7.17–7.27 (m, 2H), 2.47 (s, 3H); <sup>31</sup>P NMR (162 MHz, CDCl<sub>3</sub>) δ 8.26; <sup>13</sup>C NMR (100 MHz, CDCl<sub>3</sub>) δ 141.89 (d, *J*<sub>P-C</sub> = 1.6 Hz), 133.26 (d, *J*<sub>P-C</sub> = 121.3 Hz), 133.03 (d, *J*<sub>P-C</sub> = 1.9 Hz), 132.22 (d, *J*<sub>P-C</sub> = 2.9 Hz), 130.97 (d, *J*<sub>P-C</sub> = 11.1 Hz), 130.72, 129.82, 128.66 (d, *J*<sub>P-C</sub> = 13.4 Hz), 125.84, 119.83 (d, *J*<sub>P-C</sub> = 3.9 Hz), 104.71 (d, *J*<sub>P-C</sub> = 30.0 Hz), 86.60 (d, *J*<sub>P-C</sub> = 169.5 Hz), 20.73. HRMS: Cal.316.1017, Found 316.1011.

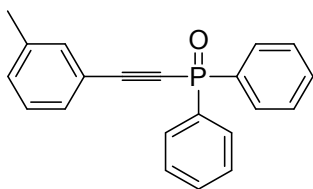

Following general procedure (60 °C, 6 h), **2c** was isolated as a white solid. <sup>1</sup>H NMR (400 MHz, CDCl<sub>3</sub>) δ 7.88–7.93 (m, 4H), 7.47–7.57 (m, 6H), 7.39–7.42 (m, 2H), 7.26–7.27 (m, 2H), 2.35 (s, 3H); <sup>31</sup>P NMR (162 MHz, CDCl<sub>3</sub>) δ 8.28; <sup>13</sup>C NMR (100 MHz, CDCl<sub>3</sub>) δ 138.44, 133.19 (d, *J*<sub>P-C</sub> = 121.4 Hz), 132.98 (d, *J*<sub>P-C</sub> = 1.9 Hz), 132.20 (d, *J*<sub>P-C</sub> = 2.9 Hz), 131.64, 130.99 (d, *J*<sub>P-C</sub> = 11.1 Hz), 129.69 (d, *J*<sub>P-C</sub> = 1.9 Hz), 128.65 (d, *J*<sub>P-C</sub> = 13.4 Hz), 128.49, 119.78 (d, *J*<sub>P-C</sub> = 4.0 Hz), 105.82 (d, *J*<sub>P-C</sub> = 30.0 Hz), 82.51 (d, *J*<sub>P-C</sub> = 169.5 Hz), 21.16. MS (EI): 316.

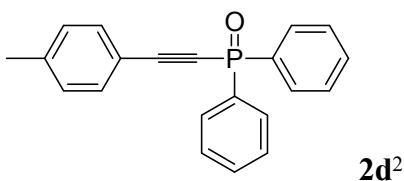

Following general procedure (60 °C, 6 h), **2d** was isolated as a white solid. <sup>1</sup>H NMR (400 MHz, CDCl<sub>3</sub>) δ 7.88–7.93 (m, 4H), 7.47–7.57 (m, 8H), 7.18 (d, 2H, *J* = 8.0 Hz), 2.38 (s, 3H); <sup>31</sup>P NMR (162 MHz, CDCl<sub>3</sub>) δ 8.18; <sup>13</sup>C NMR (100 MHz, CDCl<sub>3</sub>) δ 141.40, 133.17 (d, *J*<sub>P-C</sub> = 121.4 Hz), 132.50 (d, *J*<sub>P-C</sub> = 1.9 Hz), 132.22 (d, *J*<sub>P-C</sub> = 2.9 Hz), 131.00 (d, *J*<sub>P-C</sub> = 11.1 Hz), 129.37, 128.66 (d, *J*<sub>P-C</sub> = 13.4 Hz), 116.84 (d, *J*<sub>P-C</sub> = 4.1 Hz), 106.04 (d, *J*<sub>P-C</sub> = 30.3 Hz), 82.21 (d, *J*<sub>P-C</sub> = 170.7 Hz), 21.78. MS (EI): 316.

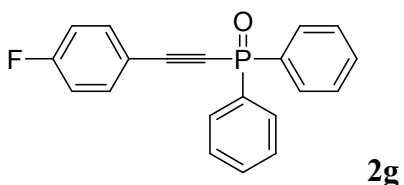

Following general procedure (60 °C, 6 h), **2g** was isolated as a white solid. m.p.: 126–127 °C. <sup>1</sup>H NMR (400 MHz, CDCl<sub>3</sub>) δ 7.87–7.93 (m, 4H), 7.48–7.61 (m, 8H), 7.07 (t, 2H, *J* = 8.4 Hz); <sup>31</sup>P NMR (162 MHz, CDCl<sub>3</sub>) δ 8.34; <sup>13</sup>C NMR (100 MHz, CDCl<sub>3</sub>) δ 163.88 (d, *J*<sub>F-C</sub> = 252.2 Hz), 134.82 (dd, *J*<sub>P-C</sub> = 1.9 Hz, *J*<sub>F-C</sub> = 8.9 Hz), 132.89 (d, *J*<sub>P-C</sub> = 121.4 Hz), 132.35 (d, *J*<sub>P-C</sub> = 2.9 Hz), 130.97 (d, *J*<sub>P-C</sub> = 11.1 Hz), 128.72 (d, *J*<sub>P-C</sub> = 13.5 Hz), 116.15 (d, *J*<sub>F-C</sub> = 22.3 Hz), 104.31 (d, *J*<sub>P-C</sub> = 29.8 Hz), 82.84 (d, *J*<sub>P-C</sub> = 168.9 Hz). HRMS: Cal. 320.0766, Found 320.0752.

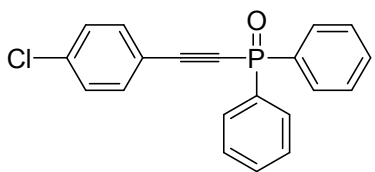

**2h**

Following general procedure (60 °C, 18 h), **2h** was isolated as a white solid. m.p.: 158–159 °C.  $^1\text{H}$  NMR (400 MHz,  $\text{CDCl}_3$ )  $\delta$  7.87–7.92 (m, 4H), 7.48–7.58 (m, 8H), 7.35 (d, 2H,  $J = 8.4$  Hz);  $^{31}\text{P}$  NMR (162 MHz,  $\text{CDCl}_3$ )  $\delta$  8.34;  $^{13}\text{C}$  NMR (100 MHz,  $\text{CDCl}_3$ )  $\delta$  137.12, 133.76 (d,  $J_{\text{P-C}} = 1.8$  Hz), 132.80 (d,  $J_{\text{P-C}} = 121.6$  Hz), 132.37 (d,  $J_{\text{P-C}} = 2.9$  Hz), 130.99 (d,  $J_{\text{P-C}} = 11.2$  Hz), 129.07, 128.73 (d,  $J_{\text{P-C}} = 13.4$  Hz), 118.43 (d,  $J_{\text{P-C}} = 4.0$  Hz), 104.05 (d,  $J_{\text{P-C}} = 24.4$  Hz), 83.98 (d,  $J_{\text{P-C}} = 166.5$  Hz). HRMS: Cal. 336.0471, Found 336.0454.

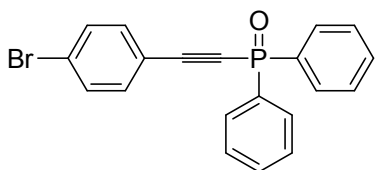

**2i<sup>3</sup>**

Following general procedure (60 °C, 24 h), **2i** was isolated as a white solid.  $^1\text{H}$  NMR (400 MHz,  $\text{CDCl}_3$ )  $\delta$  7.87–7.92 (m, 4H), 7.44–7.58 (m, 10H);  $^{31}\text{P}$  NMR (162 MHz,  $\text{CDCl}_3$ )  $\delta$  8.35;  $^{13}\text{C}$  NMR (100 MHz,  $\text{CDCl}_3$ )  $\delta$  133.86 (d,  $J_{\text{P-C}} = 1.9$  Hz), 132.73 (d,  $J_{\text{P-C}} = 121.4$  Hz), 132.42 (d,  $J_{\text{P-C}} = 2.9$  Hz), 132.00, 130.98 (d,  $J_{\text{P-C}} = 11.2$  Hz), 128.75 (d,  $J_{\text{P-C}} = 13.4$  Hz), 125.51, 118.84 (d,  $J_{\text{P-C}} = 4.0$  Hz), 104.09 (d,  $J_{\text{P-C}} = 29.2$  Hz), 84.13 (d,  $J_{\text{P-C}} = 166.3$  Hz). MS (EI): 380.

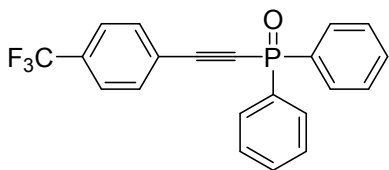

**2j<sup>3</sup>**

Following general procedure (60 °C, 6 h), **2j** was isolated as a white solid.  $^1\text{H}$  NMR (400 MHz,  $\text{CDCl}_3$ )  $\delta$  7.87–7.92 (m, 4H), 7.64–7.73 (m, 4H), 7.50–7.66 (m, 6H);  $^{31}\text{P}$  NMR (162 MHz,  $\text{CDCl}_3$ )  $\delta$  8.45;  $^{13}\text{C}$  NMR (100 MHz,  $\text{CDCl}_3$ )  $\delta$  132.87 (d,  $J_{\text{P-C}} = 1.8$  Hz), 132.53 (d,  $J_{\text{P-C}} = 2.9$  Hz), 132.49 (d,  $J_{\text{P-C}} = 121.7$  Hz), 132.30 (q,  $J_{\text{F-C}} = 33.1$  Hz), 131.00 (d,  $J_{\text{P-C}} = 11.1$  Hz), 128.79 (d,  $J_{\text{P-C}} = 13.5$  Hz), 125.57 (q,  $J_{\text{F-C}} = 3.7$  Hz), 123.73 (d,  $J_{\text{P-C}} = 4.0$  Hz), 123.49 (q,  $J_{\text{F-C}} = 269.3$  Hz), 103.14 (d,  $J_{\text{P-C}} = 29.1$  Hz), 85.27 (d,  $J_{\text{P-C}}$

= 163.5 Hz). MS (EI): 370.

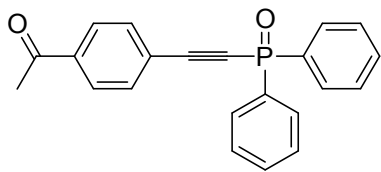

Following general procedure (60 °C, 18 h), **2k** was isolated as a white solid. m.p.: 151–152 °C. <sup>1</sup>H NMR (400 MHz, CDCl<sub>3</sub>) δ 7.96 (d, 2H, *J* = 8.4 Hz), 7.88–7.93 (m, 4H), 7.69 (d, 2H, *J* = 8.4 Hz), 7.49–7.60 (m, 6H), 2.62 (s, 3H); <sup>31</sup>P NMR (162 MHz, CDCl<sub>3</sub>) δ 8.47; <sup>13</sup>C NMR (100 MHz, CDCl<sub>3</sub>) δ 196.98, 138.12, 132.75 (d, *J*<sub>P-C</sub> = 1.8 Hz), 132.62 (d, *J*<sub>P-C</sub> = 121.6 Hz), 132.46 (d, *J*<sub>P-C</sub> = 2.9 Hz), 131.00 (d, *J*<sub>P-C</sub> = 11.2 Hz), 128.76 (d, *J*<sub>P-C</sub> = 13.5 Hz), 128.31, 124.47 (d, *J*<sub>P-C</sub> = 3.9 Hz), 103.80 (d, *J*<sub>P-C</sub> = 28.7 Hz), 85.82 (d, *J*<sub>P-C</sub> = 163.9 Hz), 26.70. HRMS: Cal.344.0966, Found 344.0950.

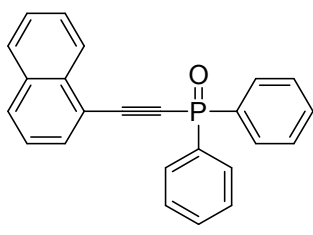

Following general procedure (60 °C, 24 h), **2l** was isolated as an oil. <sup>1</sup>H NMR (400 MHz, CDCl<sub>3</sub>) δ 8.24 (d, 1H, *J* = 8.0 Hz), 7.92–8.01 (m, 5H), 7.85 (d, 2H, *J* = 6.4 Hz), 7.51–7.59 (m, 8H), 7.45 (t, 1H, *J* = 8.0 Hz); <sup>31</sup>P NMR (162 MHz, CDCl<sub>3</sub>) δ 8.50; <sup>13</sup>C NMR (100 MHz, CDCl<sub>3</sub>) δ 133.36 (d, *J*<sub>P-C</sub> = 1.3 Hz), 133.13 (d, *J*<sub>P-C</sub> = 121.4 Hz), 132.98, 132.63 (d, *J*<sub>P-C</sub> = 2.1 Hz), 132.37 (d, *J*<sub>P-C</sub> = 2.9 Hz), 131.43, 131.05 (d, *J*<sub>P-C</sub> = 11.2 Hz), 128.78 (d, *J*<sub>P-C</sub> = 13.5 Hz), 128.61, 127.78, 126.98, 125.67, 125.09, 117.43 (d, *J*<sub>P-C</sub> = 4.0 Hz), 104.09 (d, *J*<sub>P-C</sub> = 29.8 Hz), 87.59 (d, *J*<sub>P-C</sub> = 168.0 Hz). MS (EI): 352.

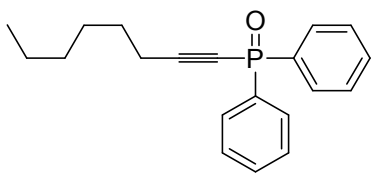

Following general procedure (60 °C, 6 h), **2n** was isolated as a oil. <sup>1</sup>H NMR (400 MHz,

CDCl<sub>3</sub>)  $\delta$  7.81–7.87 (m, 4H), 7.43–7.52 (m, 6H), 2.41–2.46 (m, 2H), 1.58–1.65 (m, 2H), 1.38–1.45 (m, 2H), 1.27–1.29 (m, 4H), 0.87 (t, 3H,  $J = 6.4$  Hz); <sup>31</sup>P NMR (162 MHz, CDCl<sub>3</sub>)  $\delta$  7.56; <sup>13</sup>C NMR (100 MHz, CDCl<sub>3</sub>)  $\delta$  133.38 (d,  $J_{\text{P-C}} = 121.1$  Hz), 132.03 (d,  $J_{\text{P-C}} = 2.9$  Hz), 130.81 (d,  $J_{\text{P-C}} = 11.2$  Hz), 128.51 (d,  $J_{\text{P-C}} = 13.3$  Hz), 109.85 (d,  $J_{\text{P-C}} = 30.3$  Hz), 74.84 (d,  $J_{\text{P-C}} = 174.2$  Hz), 31.11, 28.47, 27.47 (d,  $J_{\text{P-C}} = 1.6$  Hz), 22.43, 19.74 (d,  $J_{\text{P-C}} = 3.1$  Hz), 13.99. HRMS: Cal. 310.1487, Found 310.1475.

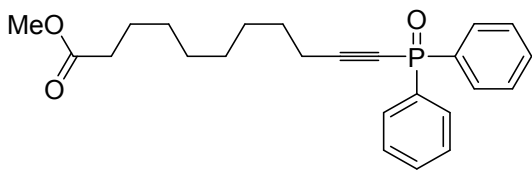

Following general procedure (60 °C, 18 h), **2o** was isolated as a white solid. m.p.: 143–145 °C. <sup>1</sup>H NMR (400 MHz, CDCl<sub>3</sub>)  $\delta$  7.80–7.85 (m, 4H), 7.44–7.55 (m, 6H), 3.66 (s, 3H), 2.45 (dt, 2H,  $J = 6.8$  Hz,  $J_{\text{P-H}} = 3.6$  Hz), 2.29 (t, 2H,  $J = 7.6$  Hz), 1.57–1.66 (m, 4H), 1.38–1.43 (m, 2H), 1.26–1.31 (m, 6H); <sup>31</sup>P NMR (162 MHz, CDCl<sub>3</sub>)  $\delta$  7.54; <sup>13</sup>C NMR (100 MHz, CDCl<sub>3</sub>)  $\delta$  174.27, 133.47 (d,  $J_{\text{P-C}} = 121.1$  Hz), 132.03 (d,  $J_{\text{P-C}} = 2.9$  Hz), 130.88 (d,  $J_{\text{P-C}} = 11.1$  Hz), 128.53 (d,  $J_{\text{P-C}} = 13.4$  Hz), 109.72 (d,  $J_{\text{P-C}} = 30.3$  Hz), 74.97 (d,  $J_{\text{P-C}} = 173.8$  Hz), 51.47, 34.05, 29.71, 29.04 (d,  $J_{\text{P-C}} = 2.1$  Hz), 28.79 (d,  $J_{\text{P-C}} = 0.5$  Hz), 27.54 (d,  $J_{\text{P-C}} = 1.6$  Hz), 24.88, 19.78 (d,  $J_{\text{P-C}} = 3.1$  Hz). HRMS: Cal. 396.1854, Found 396.1864.

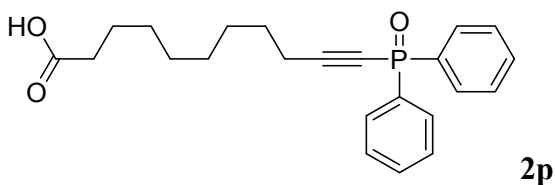

Following general procedure (60 °C, 24 h), **2p** was isolated as a white solid. m.p.: 242–244 °C. <sup>1</sup>H NMR (400 MHz, CDCl<sub>3</sub>)  $\delta$  7.81–7.86 (m, 4H), 7.47–7.54 (m, 6H), 2.47 (b, 2H), 2.34 (t, 2H,  $J = 6.8$  Hz), 1.63 (b, 3H), 1.26–1.45 (m, 10H); <sup>31</sup>P NMR (162 MHz, CDCl<sub>3</sub>)  $\delta$  8.50; <sup>13</sup>C NMR (100 MHz, CDCl<sub>3</sub>)  $\delta$  177.27, 132.85 (d,  $J_{\text{P-C}} = 123.3$  Hz), 132.22 (d,  $J_{\text{P-C}} = 2.9$  Hz), 130.95 (d,  $J_{\text{P-C}} = 11.3$  Hz), 128.61 (d,  $J_{\text{P-C}} = 13.4$  Hz), 110.24 (d,  $J_{\text{P-C}} = 30.9$  Hz), 74.63 (d,  $J_{\text{P-C}} = 175.6$  Hz), 34.18, 28.29, 28.04, 28.00, 27.92, 27.20 (d,  $J_{\text{P-C}} = 1.3$  Hz), 24.51, 19.82 (d,  $J_{\text{P-C}} = 3.0$  Hz). HRMS: Cal. 382.1698, Found

382.1687.

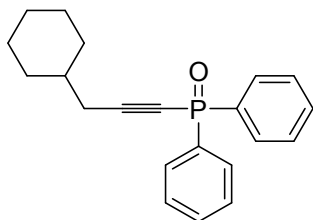

**2q**

Following general procedure (60 °C, 24 h), **2q** was isolated as a white solid. m.p.: 81–82 °C. <sup>1</sup>H NMR (400 MHz, CDCl<sub>3</sub>) δ 7.73–7.79 (m, 4H), 7.39–7.47 (m, 6H), 2.28 (b, 2H), 1.75(d, 2H, *J* = 4.4 Hz), 1.56–1.66 (m, 3H), 0.95–1.22 (m, 6H); <sup>31</sup>P NMR (162 MHz, CDCl<sub>3</sub>) δ 7.58; <sup>13</sup>C NMR (100 MHz, CDCl<sub>3</sub>) δ 133.52 (d, *J*<sub>P-C</sub> = 121.0 Hz), 132.02 (d, *J*<sub>P-C</sub> = 2.8 Hz), 130.87 (d, *J*<sub>P-C</sub> = 11.1 Hz), 128.54 (d, *J*<sub>P-C</sub> = 23.4 Hz), 108.92 (d, *J*<sub>P-C</sub> = 30.5 Hz), 75.73 (d, *J*<sub>P-C</sub> = 174.3 Hz), 36.77, 32.73, 27.52 (d, *J*<sub>P-C</sub> = 3.0 Hz), 26.02, 25.96. HRMS: Cal. 322.1487, Found 322.1471.

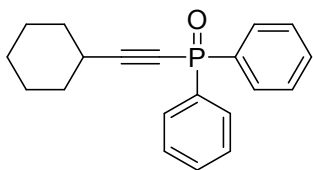

**2r**

Following general procedure (100 °C, 18 h), **2r** was isolated as an oil. <sup>1</sup>H NMR (400 MHz, CDCl<sub>3</sub>) δ 7.73–7.78 (m, 4H), 7.36–7.46 (m, 6H), 2.54–2.59 (m, 1H), 1.78–1.82 (m, 2H), 1.61–1.66 (m, 2H), 1.45–1.55 (m, 3H), 1.24–1.28 (m, 3H); <sup>31</sup>P NMR (162 MHz, CDCl<sub>3</sub>) δ 7.67; <sup>13</sup>C NMR (100 MHz, CDCl<sub>3</sub>) δ 133.56 (d, *J*<sub>P-C</sub> = 121.0 Hz), 131.99 (d, *J*<sub>P-C</sub> = 2.9 Hz), 130.84 (d, *J*<sub>P-C</sub> = 11.1 Hz), 128.53 (d, *J*<sub>P-C</sub> = 13.3 Hz), 113.23 (d, *J*<sub>P-C</sub> = 29.6 Hz), 74.55 (d, *J*<sub>P-C</sub> = 174.2 Hz), 31.45 (d, *J*<sub>P-C</sub> = 1.3 Hz), 29.82 (d, *J*<sub>P-C</sub> = 3.0 Hz), 25.56, 24.59. HRMS: Cal. 308.1330, Found 308.1314.

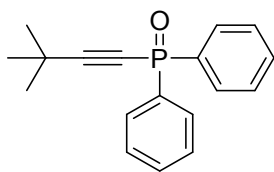

**2s**

Following general procedure (100 °C, 18 h), **2s** was isolated as a white solid. m.p.: 130–

131 °C.  $^1\text{H}$  NMR (400 MHz,  $\text{CDCl}_3$ )  $\delta$  7.79–7.85 (m, 4H), 7.44–7.54 (m, 6H), 1.34 (s, 9H);  $^{31}\text{P}$  NMR (162 MHz,  $\text{CDCl}_3$ )  $\delta$  7.64;  $^{13}\text{C}$  NMR (100 MHz,  $\text{CDCl}_3$ )  $\delta$  133.60 (d,  $J_{\text{P-C}} = 121.0$  Hz), 131.97 (d,  $J_{\text{P-C}} = 2.9$  Hz), 130.83 (d,  $J_{\text{P-C}} = 11.1$  Hz), 128.53 (d,  $J_{\text{P-C}} = 13.3$  Hz), 116.79 (d,  $J_{\text{P-C}} = 28.7$  Hz), 73.08 (d,  $J_{\text{P-C}} = 173.8$  Hz), 29.98 (d,  $J_{\text{P-C}} = 1.5$  Hz), 28.51 (d,  $J_{\text{P-C}} = 2.8$  Hz). HRMS: Cal. 282.1174, Found 282.1157.

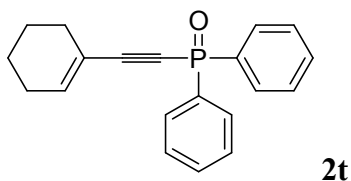

Following general procedure (60 °C, 24 h), **2t** was isolated as a white solid. m.p.: 110–111 °C.  $^1\text{H}$  NMR (400 MHz,  $\text{CDCl}_3$ )  $\delta$  7.85 (b, 4H), 7.46–7.54 (m, 6H), 6.48 (b, 1H), 2.16–2.20 (m, 4H), 1.59–1.67 (m, 4H);  $^{31}\text{P}$  NMR (162 MHz,  $\text{CDCl}_3$ )  $\delta$  8.13;  $^{13}\text{C}$  NMR (100 MHz,  $\text{CDCl}_3$ )  $\delta$  140.70 (d,  $J_{\text{P-C}} = 12.6$  Hz), 132.49 (d,  $J_{\text{P-C}} = 121.2$  Hz), 130.94 (d,  $J_{\text{P-C}} = 2.9$  Hz), 129.90 (d,  $J_{\text{P-C}} = 11.1$  Hz), 127.53 (d,  $J_{\text{P-C}} = 14.3$  Hz), 117.88 (d,  $J_{\text{P-C}} = 4.2$  Hz), 106.81 (d,  $J_{\text{P-C}} = 30.2$  Hz), 79.08 (d,  $J_{\text{P-C}} = 173.2$  Hz), 26.98 (d,  $J_{\text{P-C}} = 1.0$  Hz), 24.88, 20.82, 20.05. HRMS: Cal. 306.1174, Found 306.1166.

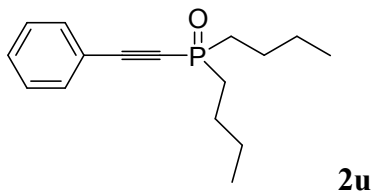

Following general procedure (60 °C, 24 h), **2u** was isolated as an oil.  $^1\text{H}$  NMR (400 MHz,  $\text{CDCl}_3$ )  $\delta$  7.54 (d, 2H,  $J = 7.6$  Hz), 7.35–7.46 (m, 3H), 1.89–2.01 (m, 4H), 1.69–1.77 (m, 4H), 1.45–1.54 (m, 4H), 0.97 (t, 6H,  $J = 7.2$  Hz);  $^{31}\text{P}$  NMR (162 MHz,  $\text{CDCl}_3$ )  $\delta$  26.13;  $^{13}\text{C}$  NMR (100 MHz,  $\text{CDCl}_3$ )  $\delta$  132.38 (d,  $J_{\text{P-C}} = 1.7$  Hz), 130.34, 128.54, 120.24 (d,  $J_{\text{P-C}} = 3.6$  Hz), 102.42 (d,  $J_{\text{P-C}} = 25.1$  Hz), 82.94 (d,  $J_{\text{P-C}} = 143.7$  Hz), 31.12 (d,  $J_{\text{P-C}} = 79.6$  Hz), 24.03 (d,  $J_{\text{P-C}} = 4.1$  Hz), 23.95 (d,  $J_{\text{P-C}} = 15.8$  Hz), 13.66. HRMS: Cal. 262.1487, Found 262.1472.



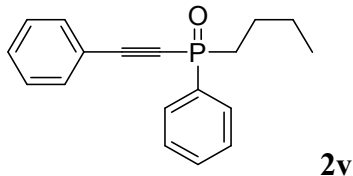

Following general procedure (60 °C, 24 h), **2v** was isolated as an oil. <sup>1</sup>H NMR (400 MHz, CDCl<sub>3</sub>) δ 7.81–7.86 (m, 2H), 7.29–7.51 (m, 8H), 2.02–2.11 (m, 2H), 1.55–1.65 (m, 2H), 1.33–1.42 (m, 2H), 0.84 (t, 3H, *J* = 8.0 Hz); <sup>31</sup>P NMR (162 MHz, CDCl<sub>3</sub>) δ 17.01; <sup>13</sup>C NMR (100 MHz, CDCl<sub>3</sub>) δ 132.49 (d, *J*<sub>P-C</sub> = 1.7 Hz), 132.27 (d, *J*<sub>P-C</sub> = 114.5 Hz), 132.19 (d, *J*<sub>P-C</sub> = 2.8 Hz), 130.53 (d, *J*<sub>P-C</sub> = 5.5 Hz), 130.40, 128.70 (d, *J*<sub>P-C</sub> = 12.8 Hz), 128.58, 120.07 (d, *J*<sub>P-C</sub> = 3.8 Hz), 103.75 (d, *J*<sub>P-C</sub> = 27.5 Hz), 82.86 (d, *J*<sub>P-C</sub> = 156.0 Hz), 33.67 (d, *J*<sub>P-C</sub> = 83.7 Hz), 23.90 (d, *J*<sub>P-C</sub> = 2.1 Hz), 23.84 (d, *J*<sub>P-C</sub> = 24.9 Hz), 13.62. HRMS: Cal. 282.1174, Found 282.1157.

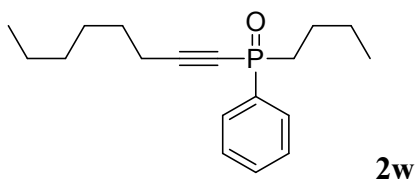

Following general procedure (60 °C, 24 h), **2w** was isolated as an oil. <sup>1</sup>H NMR (400 MHz, CDCl<sub>3</sub>) δ 7.81–7.86 (m, 2H), 7.49–7.57 (m, 3H), 2.40 (t, 2H, *J* = 7.2 Hz), 1.97–2.05 (m, 2H), 1.57–1.62 (m, 4H), 1.38–1.43 (m, 4H), 1.30 (b, 4H), 0.89 (t, 6H, *J* = 6.8 Hz); <sup>31</sup>P NMR (162 MHz, CDCl<sub>3</sub>) δ 16.38; <sup>13</sup>C NMR (100 MHz, CDCl<sub>3</sub>) δ 132.59 (d, *J*<sub>P-C</sub> = 114.3 Hz), 131.88 (d, *J*<sub>P-C</sub> = 2.8 Hz), 130.30 (d, *J*<sub>P-C</sub> = 10.5 Hz), 128.47 (d, *J*<sub>P-C</sub> = 12.7 Hz), 107.83 (d, *J*<sub>P-C</sub> = 28.1 Hz), 74.69 (d, *J*<sub>P-C</sub> = 161.9 Hz), 33.67 (d, *J*<sub>P-C</sub> = 84.0 Hz), 31.10, 28.43, 27.48, 23.85 (d, *J*<sub>P-C</sub> = 9.5 Hz), 23.73 (d, *J*<sub>P-C</sub> = 22.4 Hz), 22.41, 19.54 (d, *J*<sub>P-C</sub> = 2.9 Hz), 13.94, 13.53. HRMS: Cal. 290.1800, Found 290.1782.

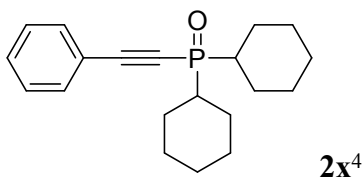

Following general procedure (60 °C, 12 h), **2x** was isolated as a white solid. <sup>1</sup>H NMR (400 MHz, CDCl<sub>3</sub>) δ 7.54–7.56 (m, 2H), 7.35–7.46 (m, 3H), 2.05–2.08 (m, 2H), 1.86–

1.99 (m, 8H), 1.68–1.76 (m, 2H), 1.49–1.61 (m, 4H), 1.21–1.41 (m, 6H);  $^{31}\text{P}$  NMR (162 MHz,  $\text{CDCl}_3$ )  $\delta$  35.75;  $^{13}\text{C}$  NMR (100 MHz,  $\text{CDCl}_3$ )  $\delta$  132.44 (d,  $J_{\text{P-C}} = 1.6$  Hz), 130.29, 128.52, 120.31 (d,  $J_{\text{P-C}} = 3.5$  Hz), 103.41 (d,  $J_{\text{P-C}} = 21.8$  Hz), 81.02 (d,  $J_{\text{P-C}} = 137.0$  Hz), 36.69 (d,  $J_{\text{P-C}} = 78.3$  Hz), 26.29 (d,  $J_{\text{P-C}} = 9.5$  Hz), 26.15 (d,  $J_{\text{P-C}} = 9.2$  Hz), 25.82 (d,  $J_{\text{P-C}} = 1.3$  Hz), 25.74 (d,  $J_{\text{P-C}} = 3.2$  Hz), 24.66 (d,  $J_{\text{P-C}} = 3.3$  Hz). MS (EI): 314.

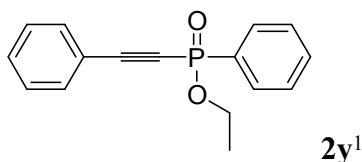

Under  $\text{N}_2$  atmosphere, 0.2 mmol  $\text{Ph}(\text{EtO})\text{P}(\text{O})\text{H}$  **1e**, 0.2 mmol phenylacetylene, 5 mol%  $\text{Pd}(\text{OAc})_2$ , 0.4 mmol  $\text{AgBF}_4$ , 0.4 mmol triethylamine and 1 mL THF were charged into a 10 mL schlenck tube, the mixture was stirred at 100 °C for 16 hours. **2y** was isolated as an oil.  $^1\text{H}$  NMR (400 MHz,  $\text{CDCl}_3$ )  $\delta$  7.93–7.80 (m, 2H), 7.51–7.56 (m, 5H), 7.42–7.46 (m, 1H), 7.34–7.38 (m, 2H), 4.26–4.35 (m, 2H), 1.44 (t, 3H,  $J = 11.2$  Hz);  $^{31}\text{P}$  NMR (162 MHz,  $\text{CDCl}_3$ )  $\delta$  9.74;  $^{13}\text{C}$  NMR (100 MHz,  $\text{CDCl}_3$ )  $\delta$  132.84 (d,  $J_{\text{P-C}} = 2.9$  Hz), 132.59 (d,  $J_{\text{P-C}} = 1.6$  Hz), 131.14 (d,  $J_{\text{P-C}} = 11.2$  Hz), 131.07 (d,  $J_{\text{P-C}} = 164.6$  Hz), 130.68, 128.60 (d,  $J_{\text{P-C}} = 14.8$  Hz), 128.56, 119.74 (d,  $J_{\text{P-C}} = 4.3$  Hz), 101.59 (d,  $J_{\text{P-C}} = 39.3$  Hz), 81.66 (d,  $J_{\text{P-C}} = 214.7$  Hz), 62.34 (d,  $J_{\text{P-C}} = 6.3$  Hz), 16.40 (d,  $J_{\text{P-C}} = 7.1$  Hz). MS (EI): 270.

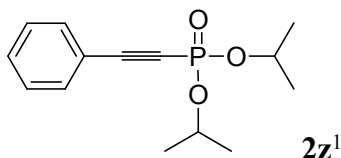

Under  $\text{N}_2$  atmosphere, 0.2 mmol diisopropylphoshite **1f**, 0.4 mmol phenylacetylene, 5 mol%  $\text{Pd}(\text{OAc})_2$ , 0.4 mmol  $\text{AgBF}_4$ , 0.4 mmol  $\text{Et}_3\text{N}$  and 1 mL THF were charged into a 10 mL schlenck tube, the mixture was stirred at 100 °C for 16 hours. **2z** was isolated as an oil.  $^1\text{H}$  NMR (400 MHz,  $\text{CDCl}_3$ )  $\delta$  7.56 (d, 2H,  $J = 6.8$  Hz), 7.45 (t, 1H,  $J = 6.8$  Hz), 7.38 (t, 2H,  $J = 7.2$  Hz), 4.80–4.84 (m, 2H), 1.42 (d, 12H,  $J = 4.2$  Hz);  $^{31}\text{P}$  NMR (162 MHz,  $\text{CDCl}_3$ )  $\delta$  -8.52;  $^{13}\text{C}$  NMR (100 MHz,  $\text{CDCl}_3$ )  $\delta$  132.46 (d,  $J_{\text{P-C}} = 1.3$  Hz), 130.50, 128.51, 119.74 (d,  $J_{\text{P-C}} = 5.5$  Hz), 98.11 (d,  $J_{\text{P-C}} = 52.6$  Hz), 79.74 (d,  $J_{\text{P-C}} = 297.1$  Hz), 72.33 (d,  $J_{\text{P-C}} = 5.4$  Hz), 23.89 (d,  $J_{\text{P-C}} = 4.5$  Hz), 23.61 (d,  $J_{\text{P-C}} = 4.7$  Hz). MS (EI): 266.

- (1) Y. Wang, J. Gan, L. Liu, H. Yuan, Y. Gao, Y. Liu and Y. Zhao, *J. Org. Chem.*, 2014, **79**, 3678.
- (2) J. Hu, N. Zhao, B. Yang, G. Wang, L.-N. Guo, Y.-M. Liang and S.-D. Yang, *Chem. Eur. J.*, 2011, **17**, 5516.
- (3) X. Yang, D. Matsuo, Y. Suzuma, J.-K. Fang, F. Xu, A. Orita, J. Otera, S. Kajiyama, N. Koumura and K. Hara, *Synlett.*, 2011, **16**, 2402.
- (4) S. Doherty, J. G. Knight, C. H. Smyth and G. A. Jorgenson, *Adv. Synth. Catal.*, 2008, **350**, 1808.

# Copies of $^1\text{H}$ NMR, $^{31}\text{P}$ NMR and $^{13}\text{C}$ NMR spectra

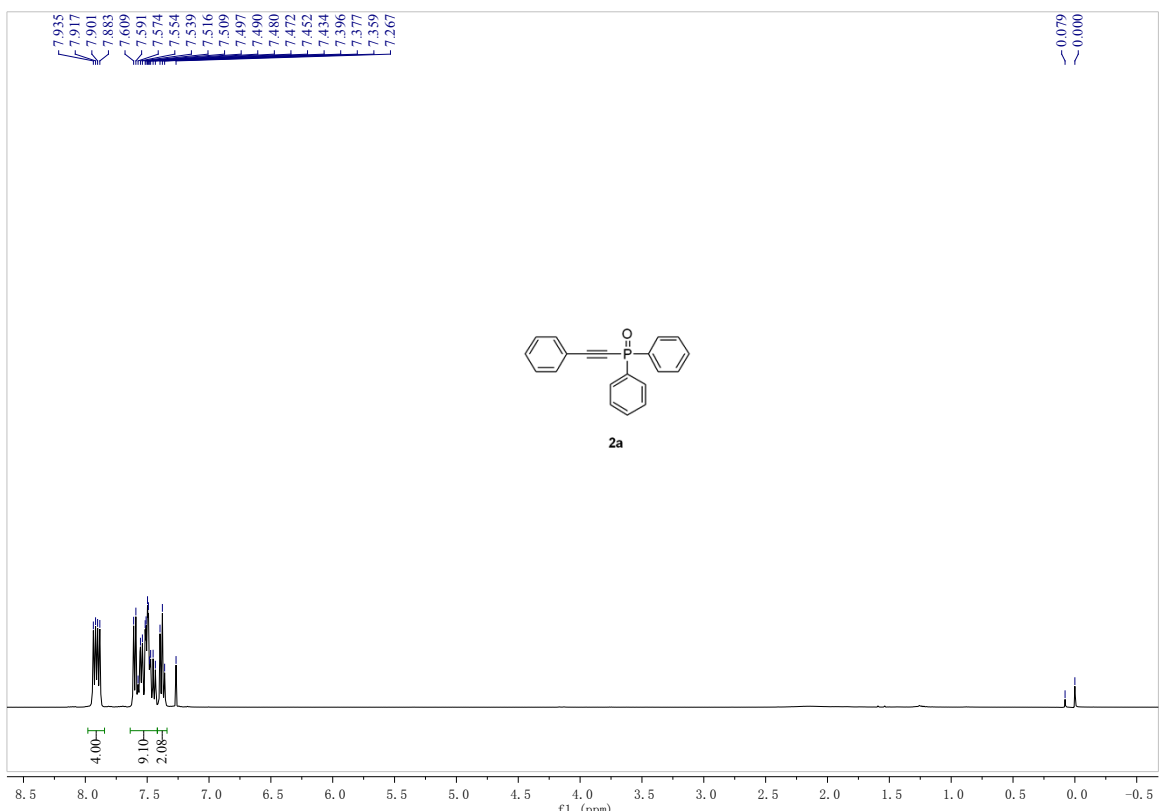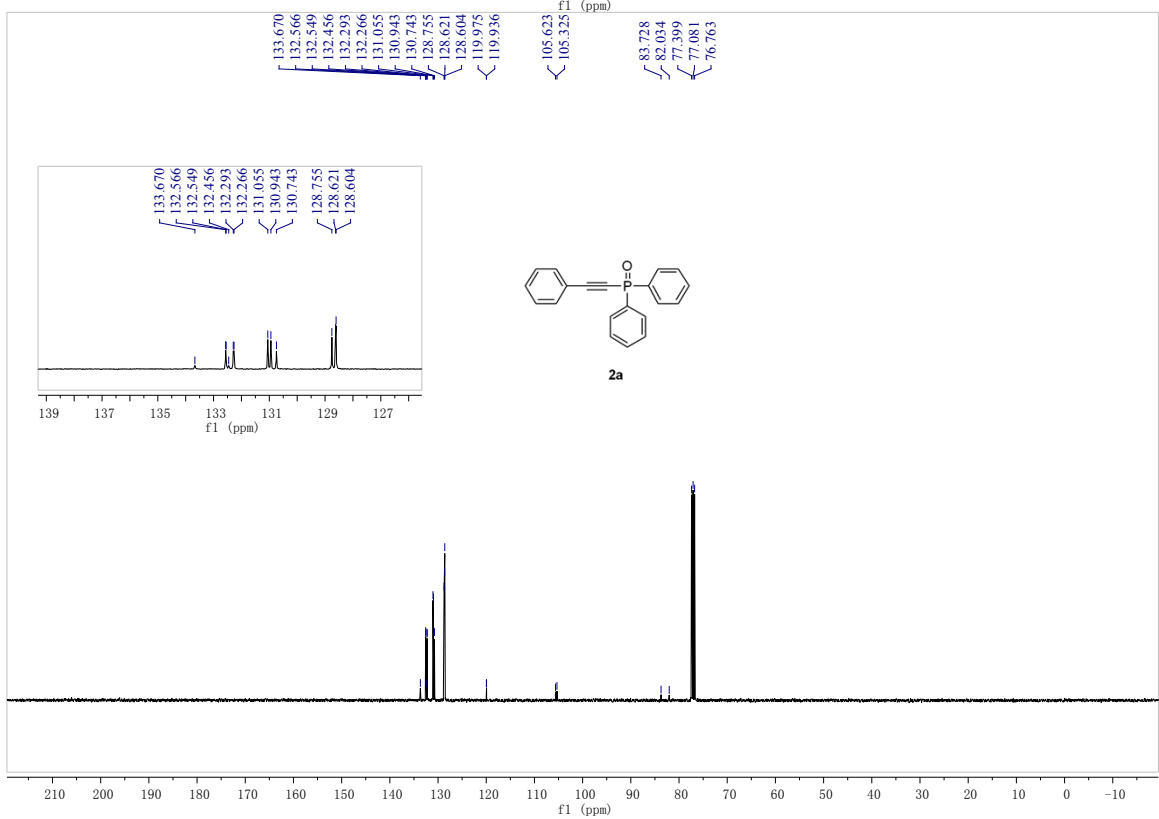

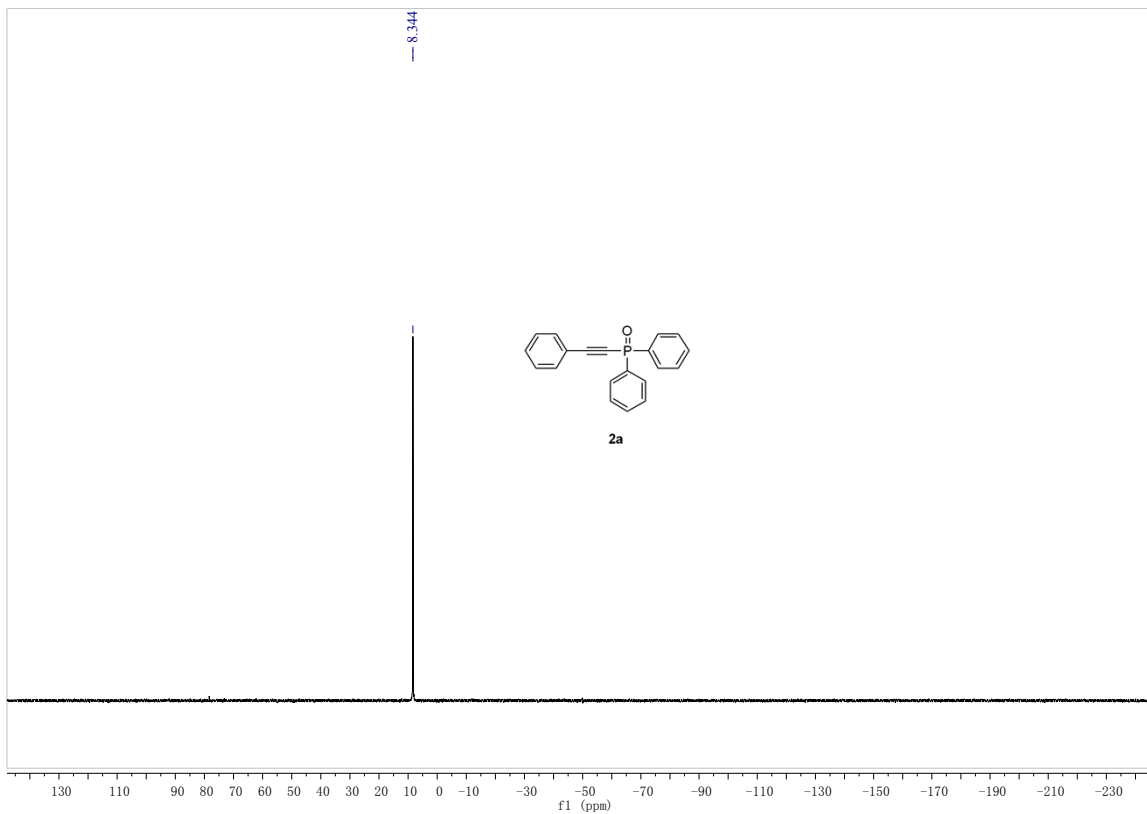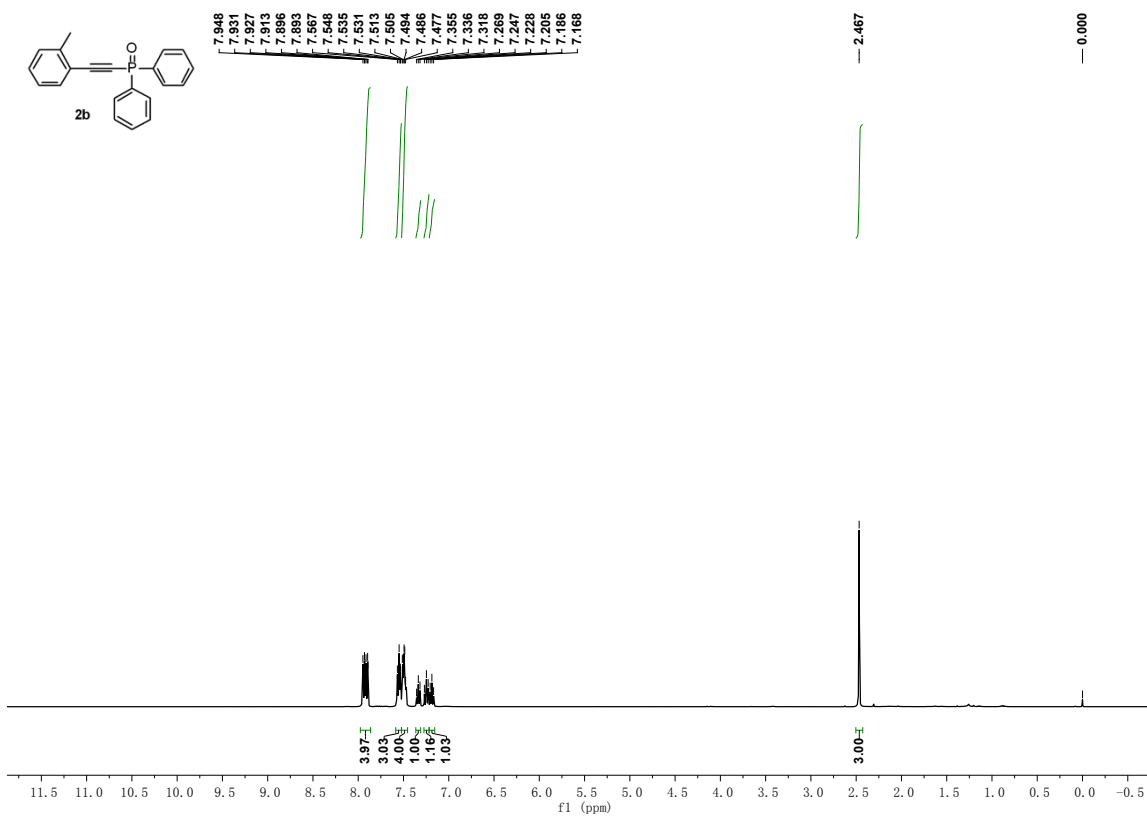

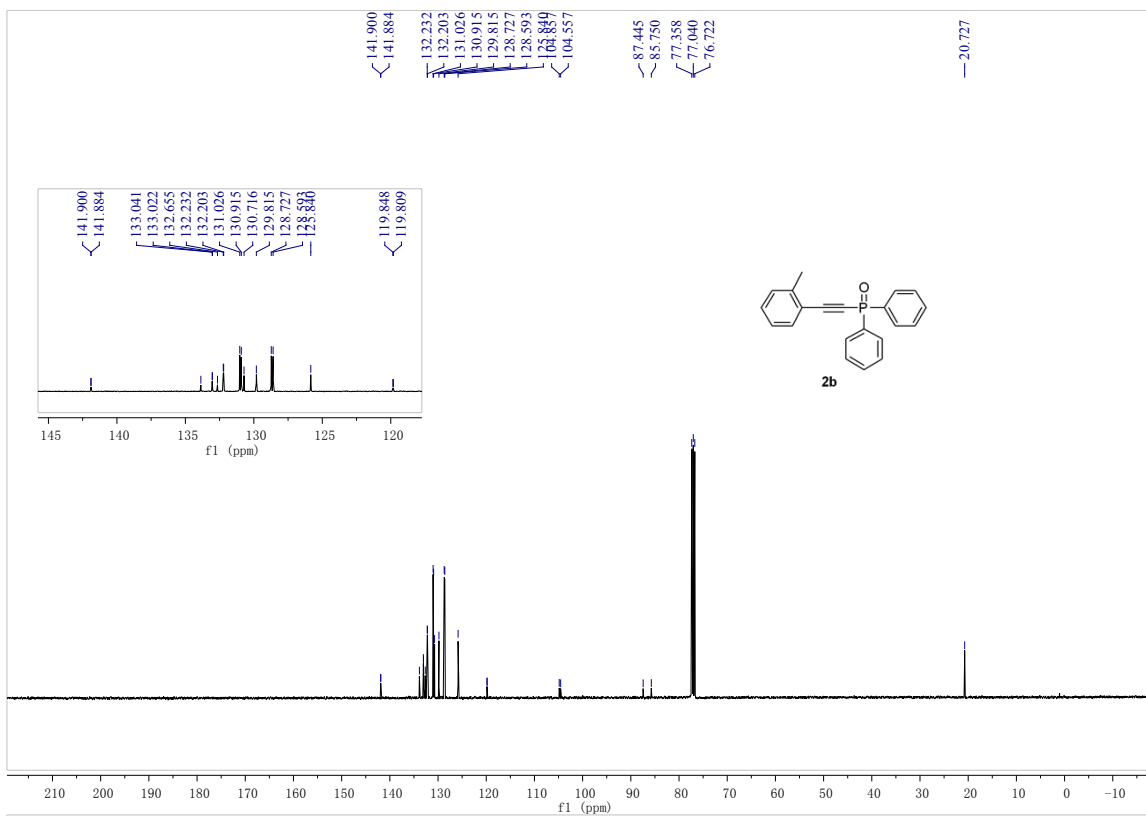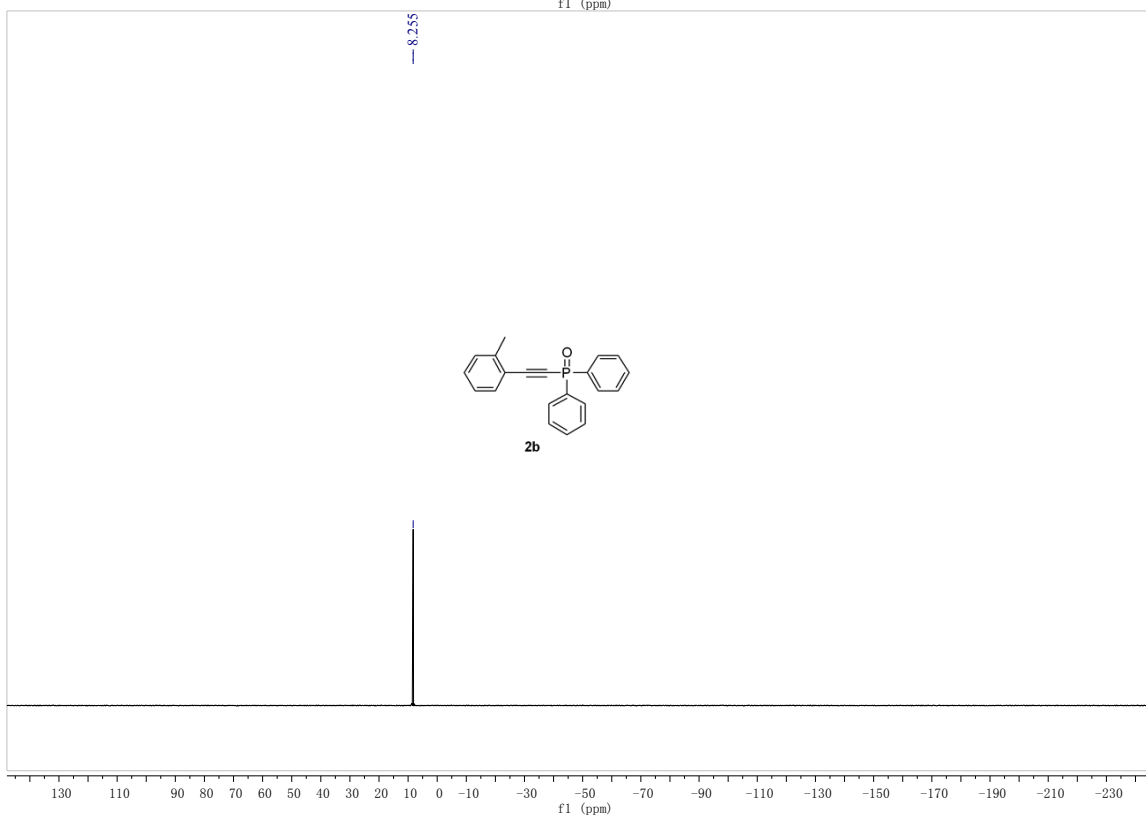

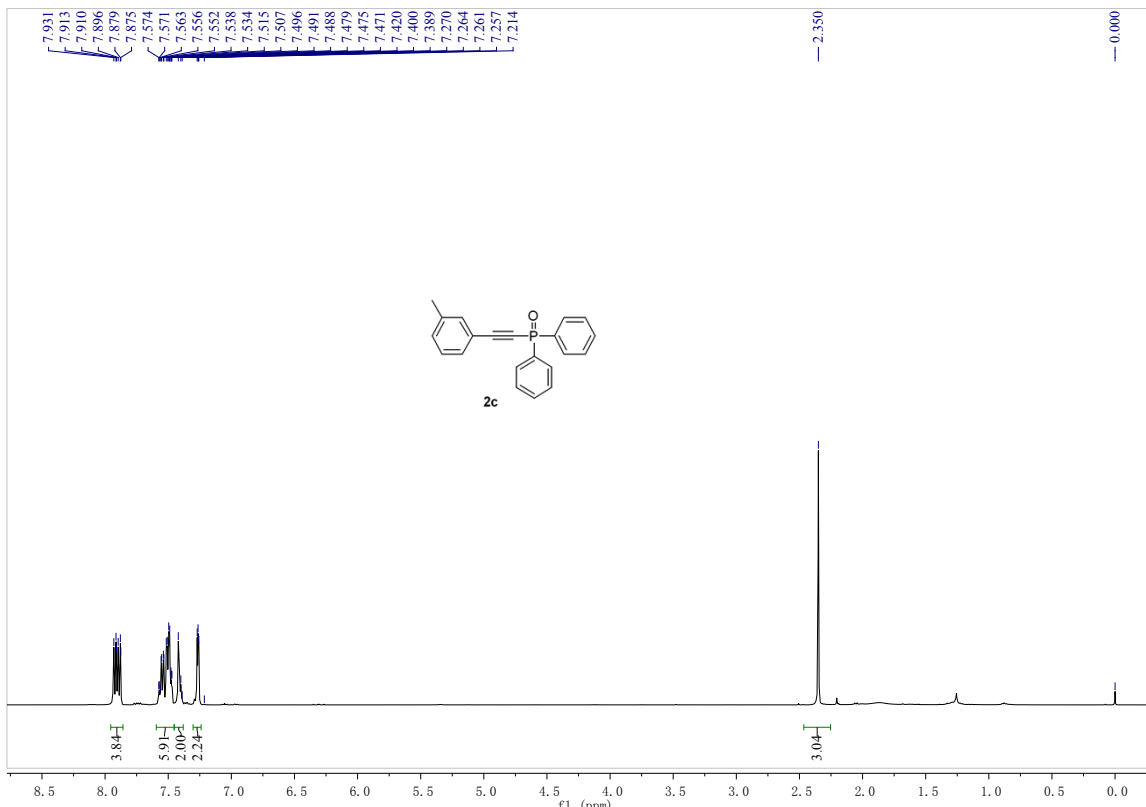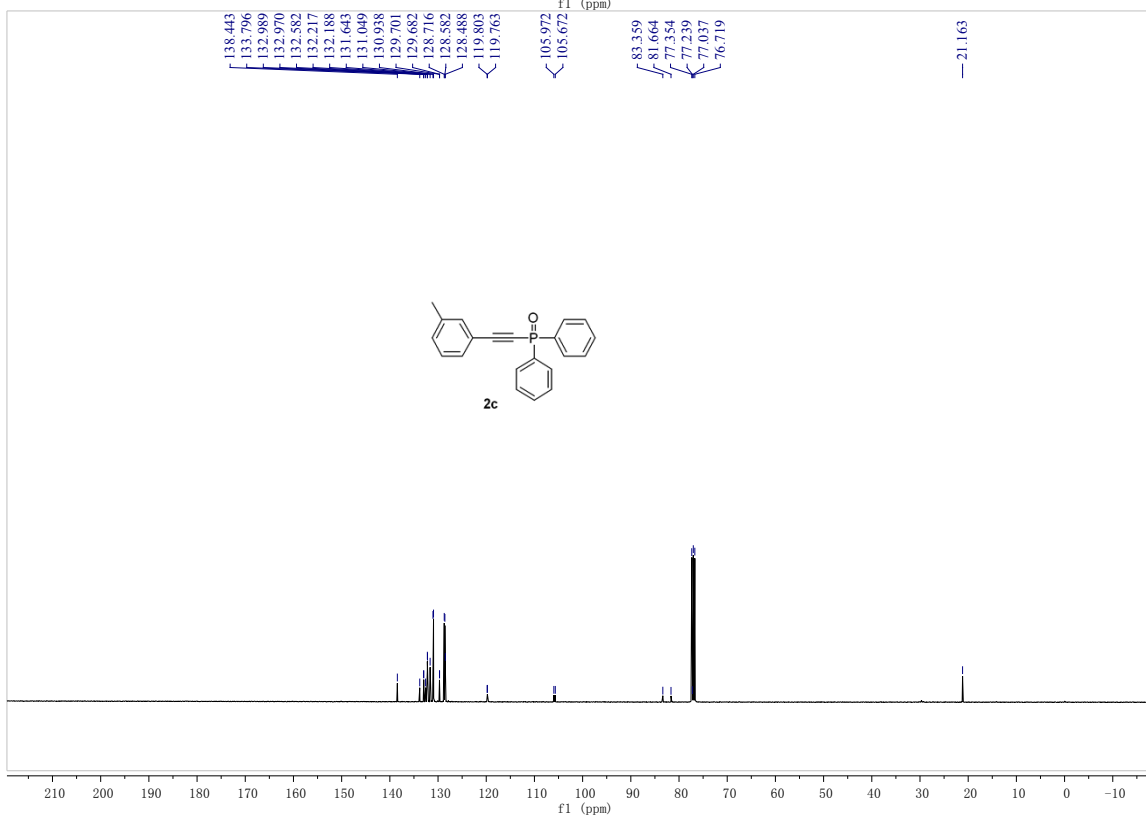

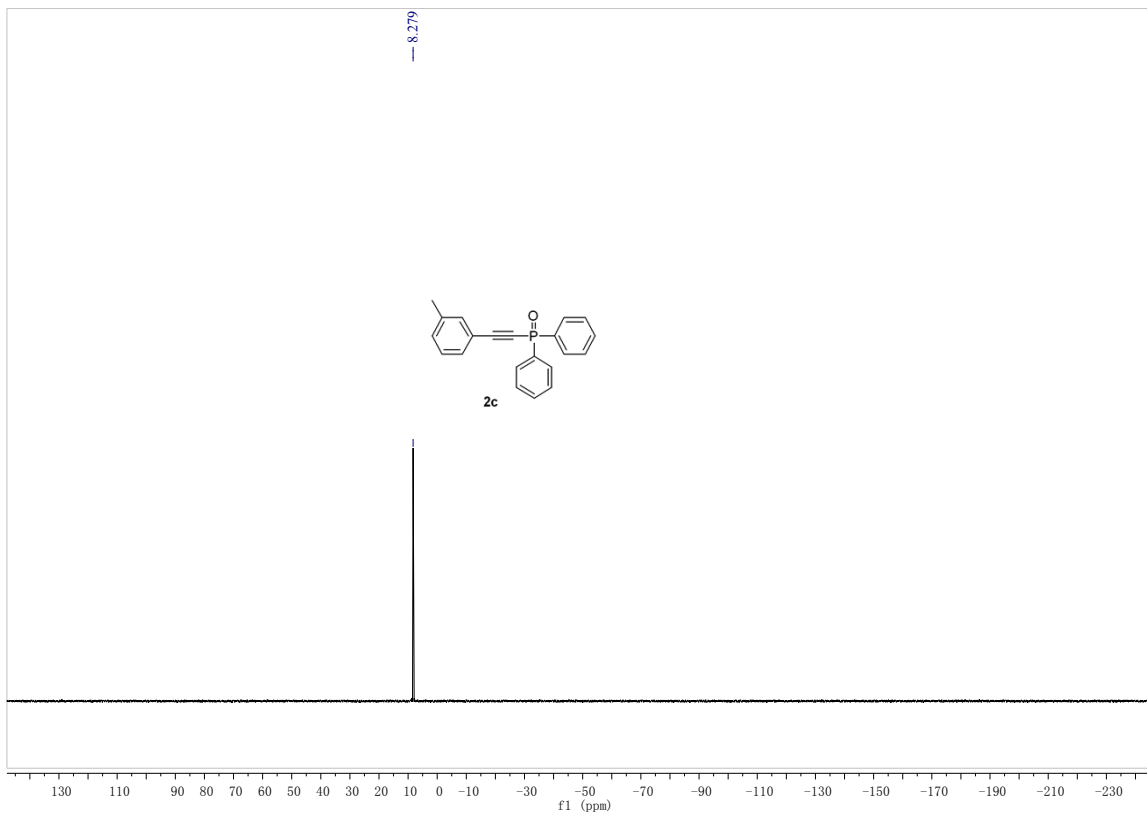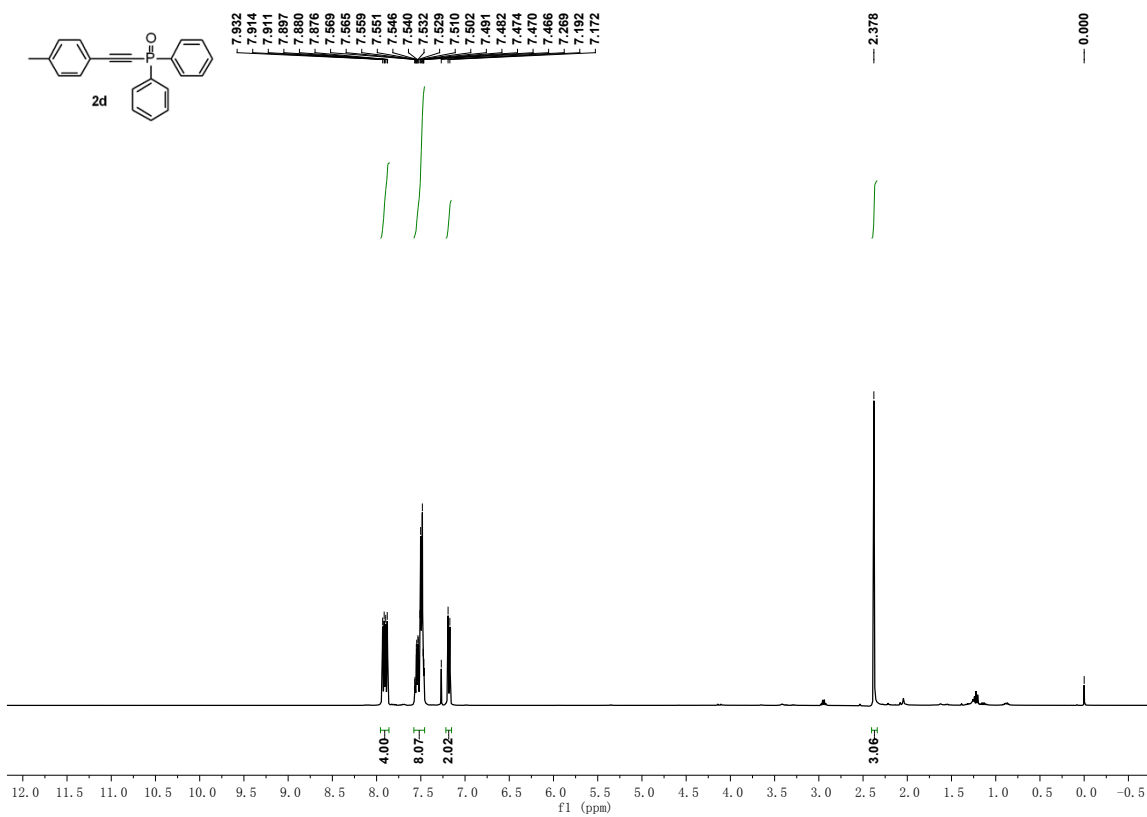



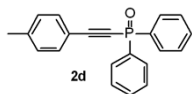

— 141.396  
 / 132.485  
 / 131.052  
 / 130.944  
 / 129.373  
 / 128.730  
 / 118.588  
 / 116.522  
 / 106.192  
 / 105.889  
 / 83.064  
 / 77.344  
 / 77.096  
 / 76.778  
 — 21.777

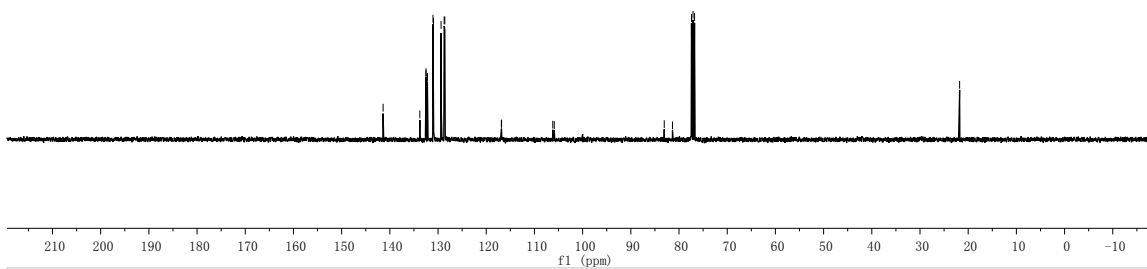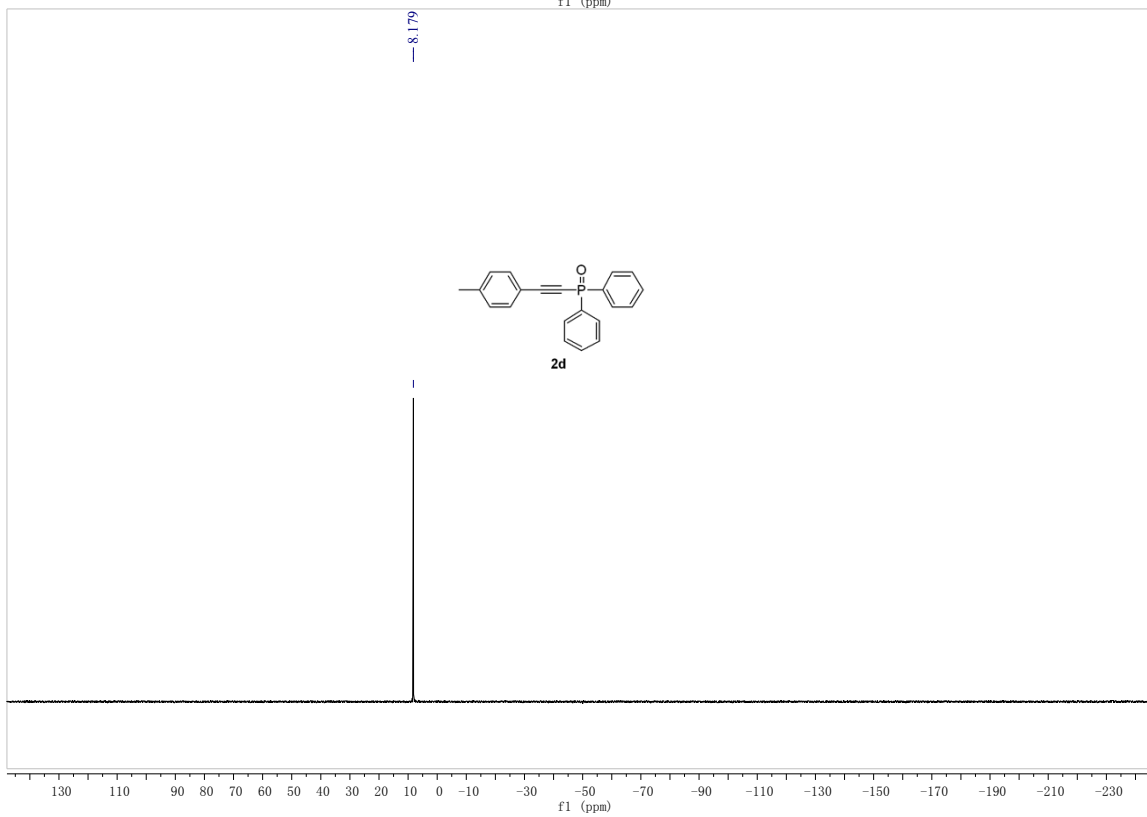

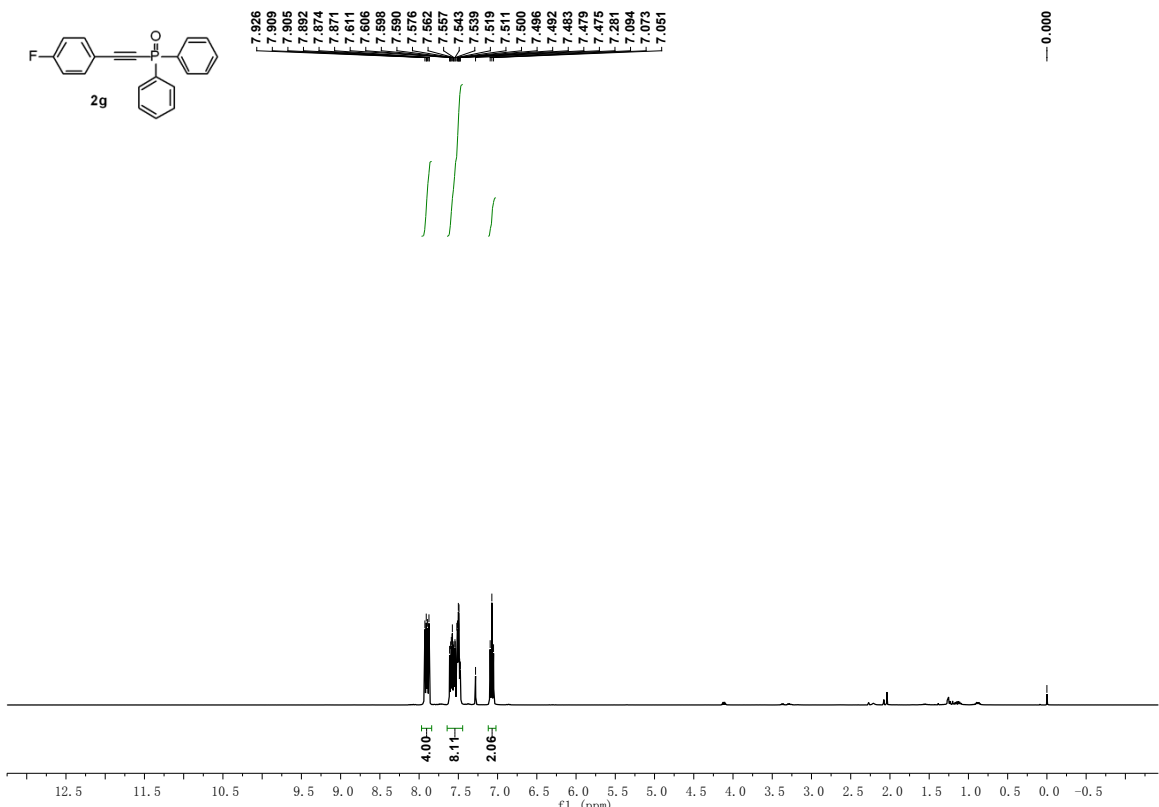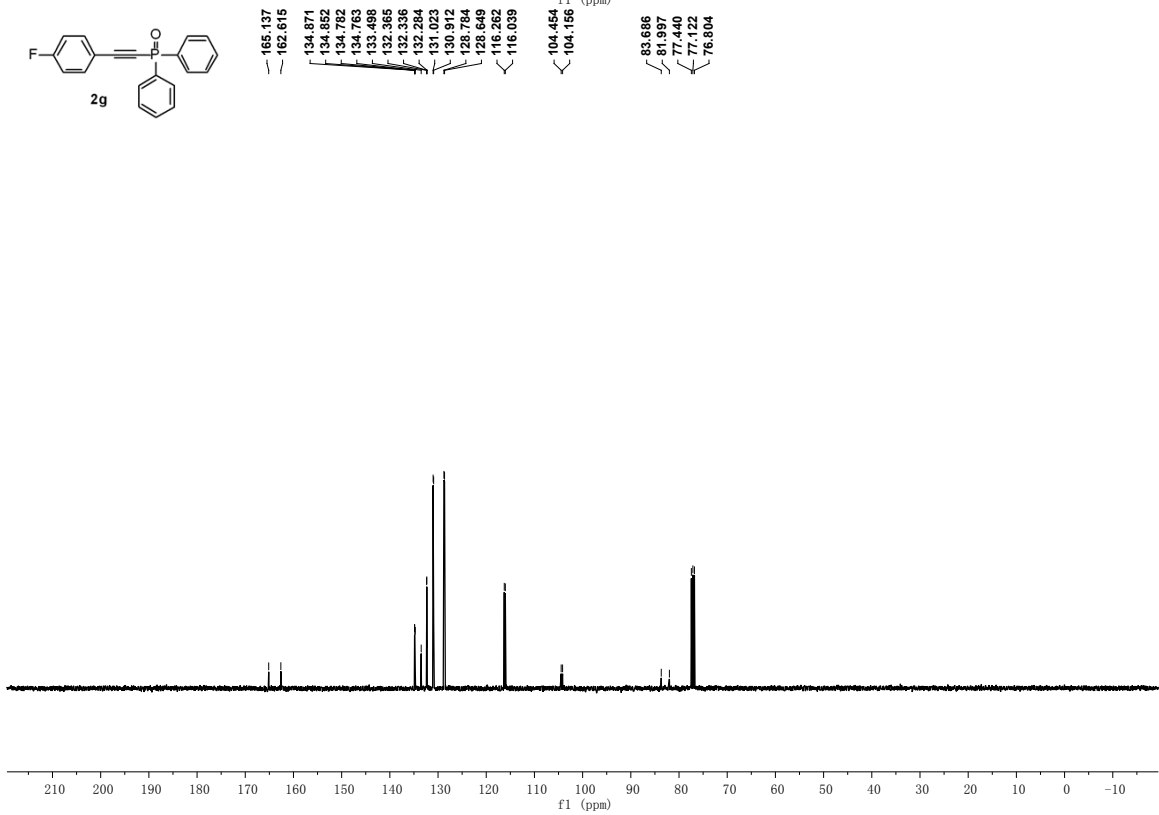

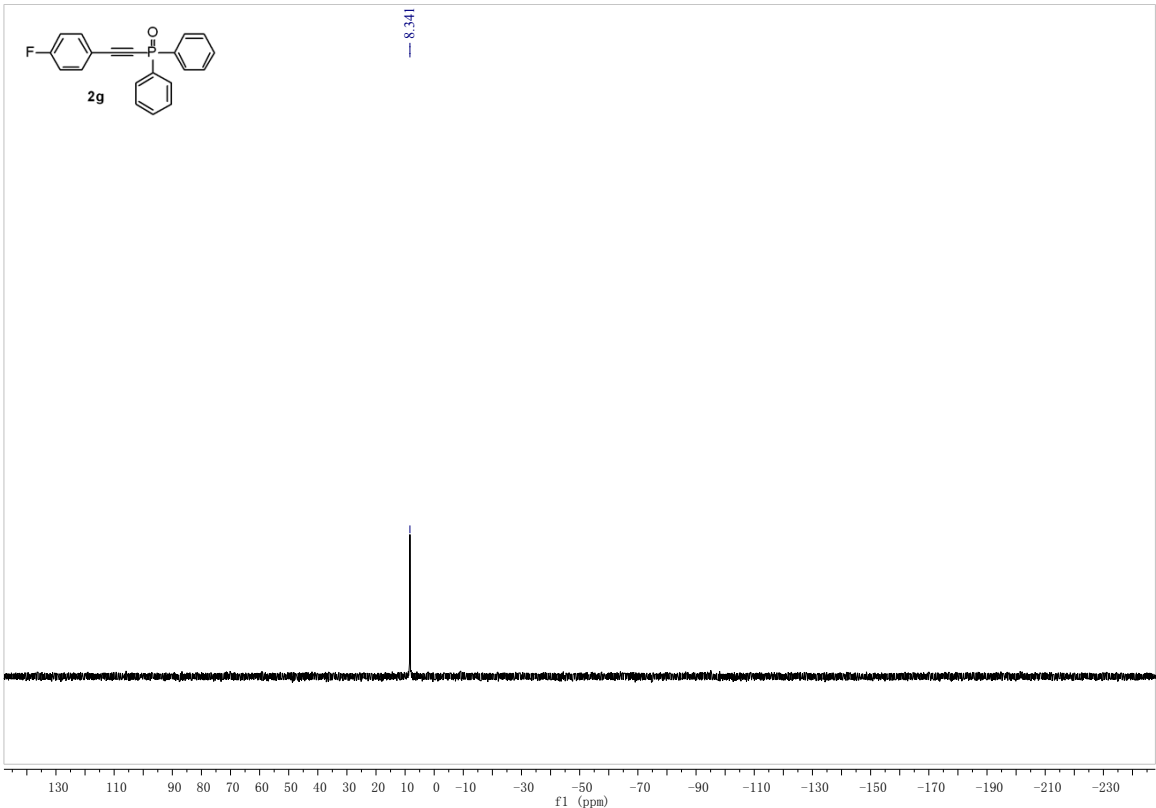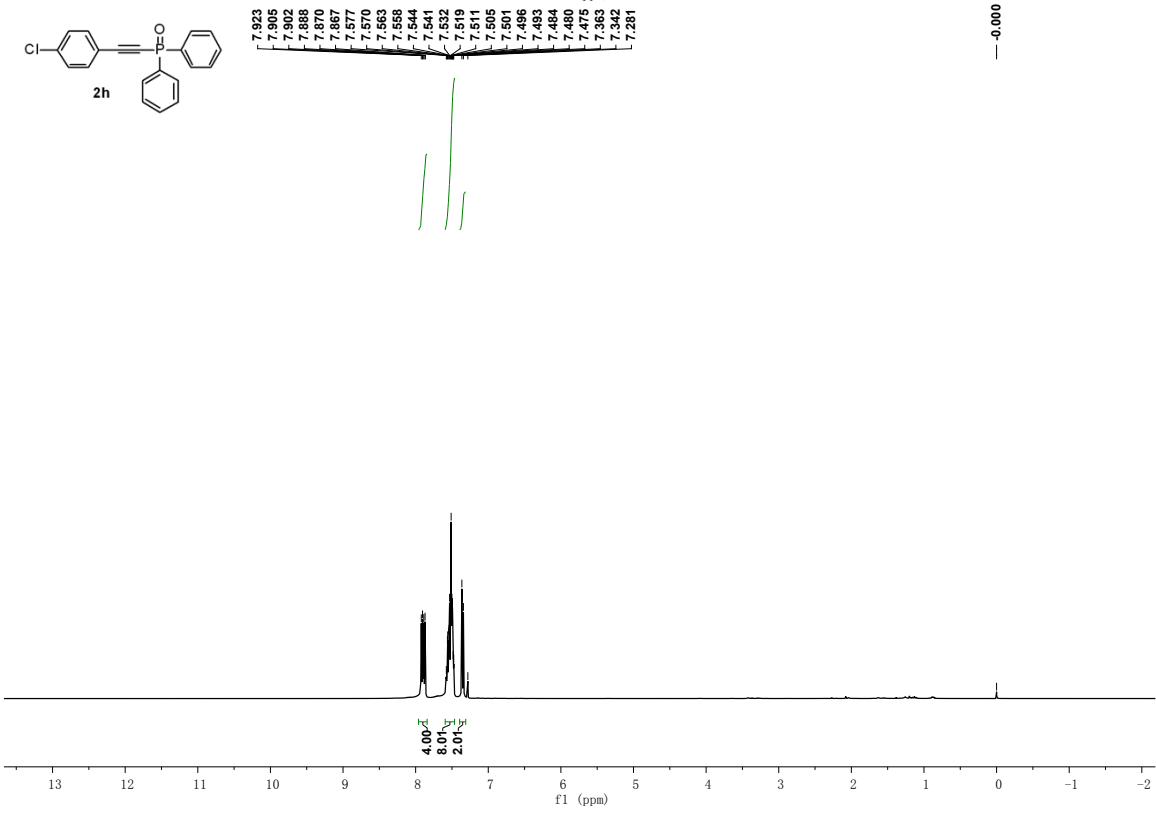

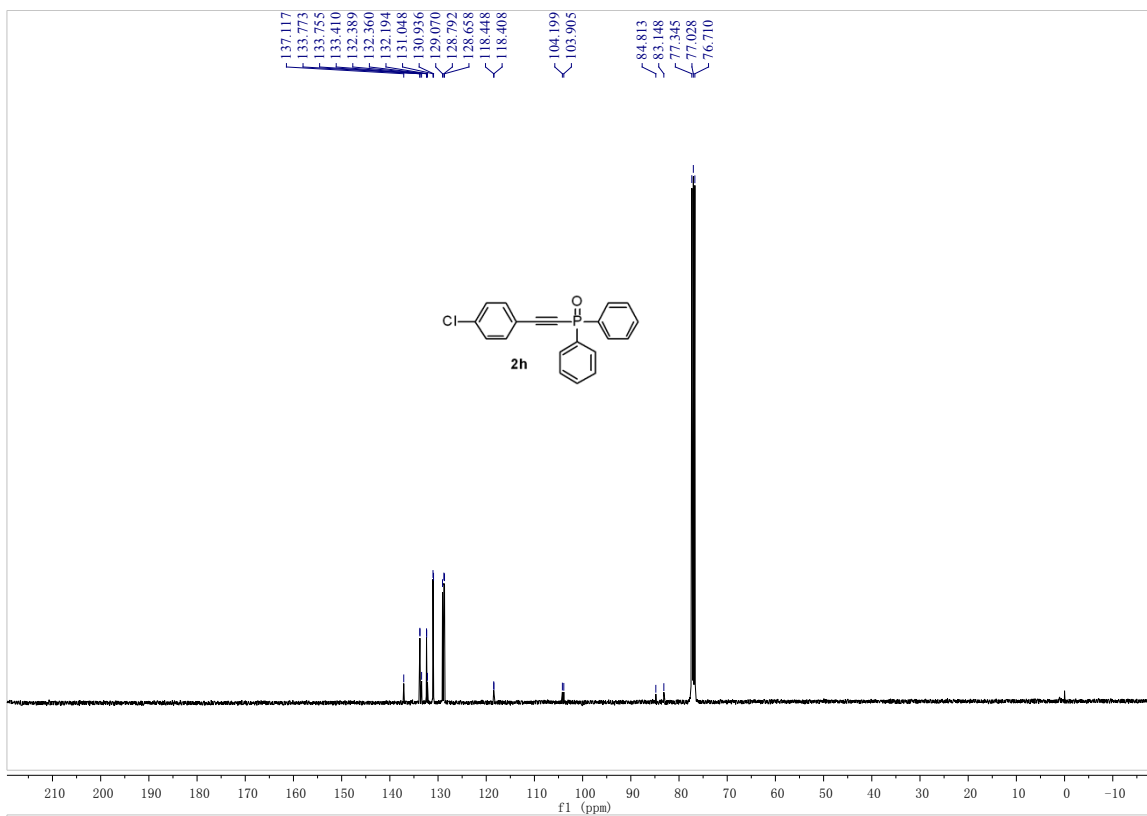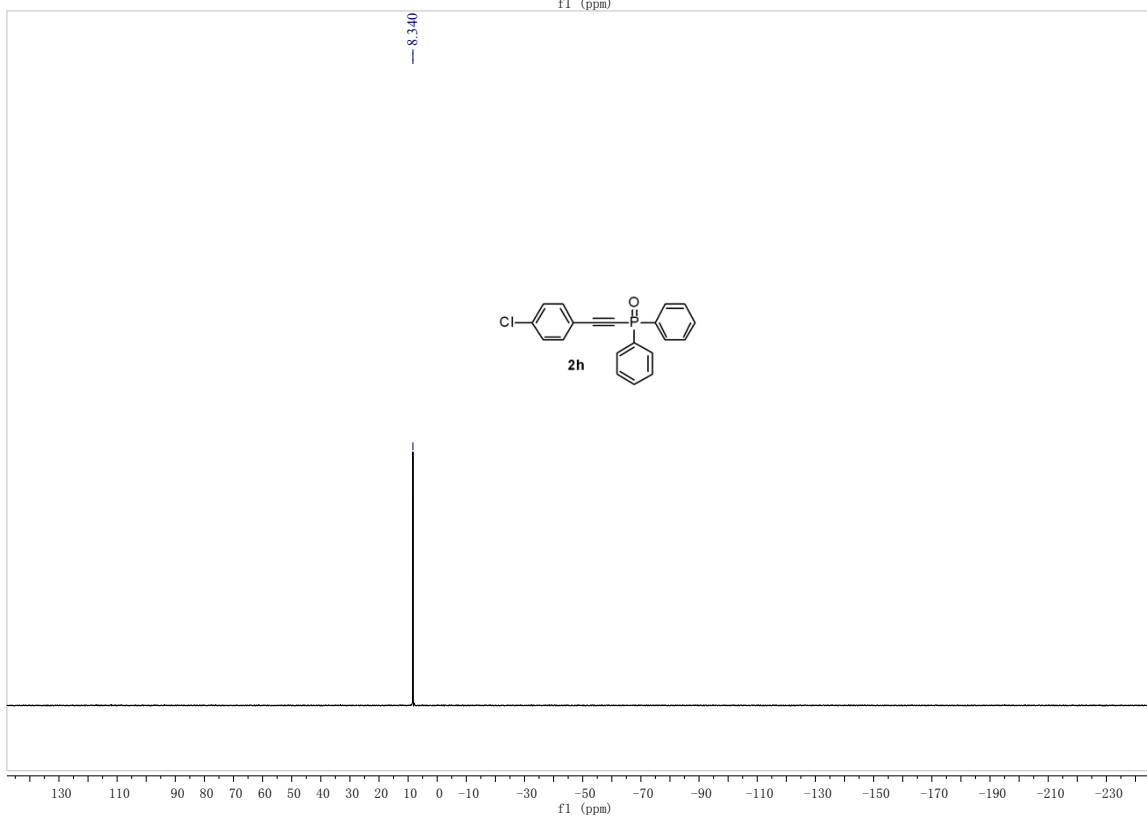

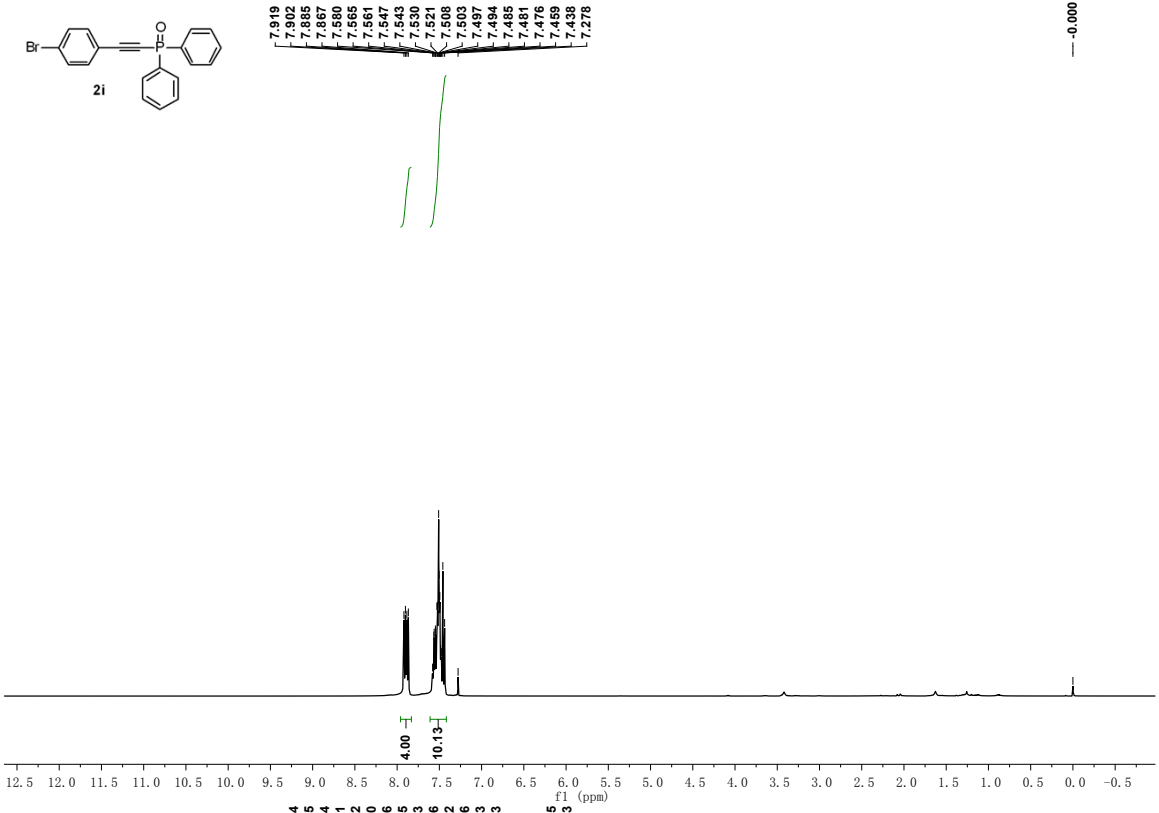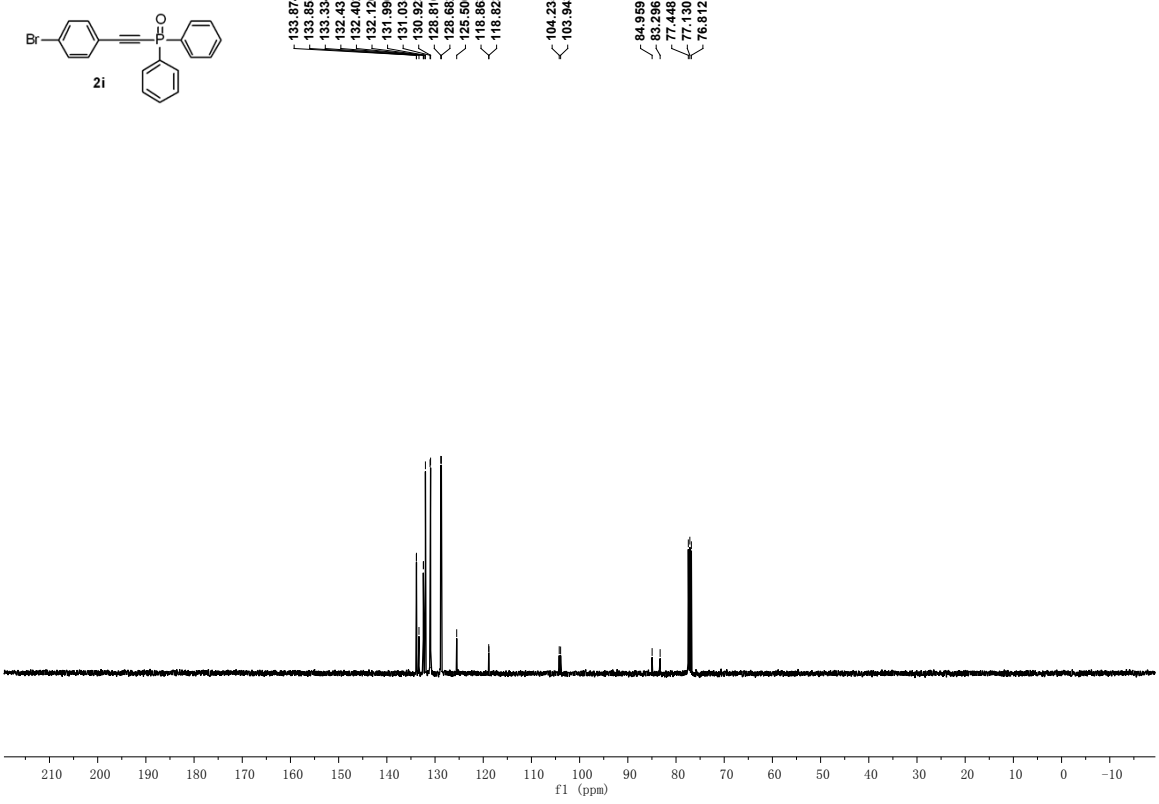

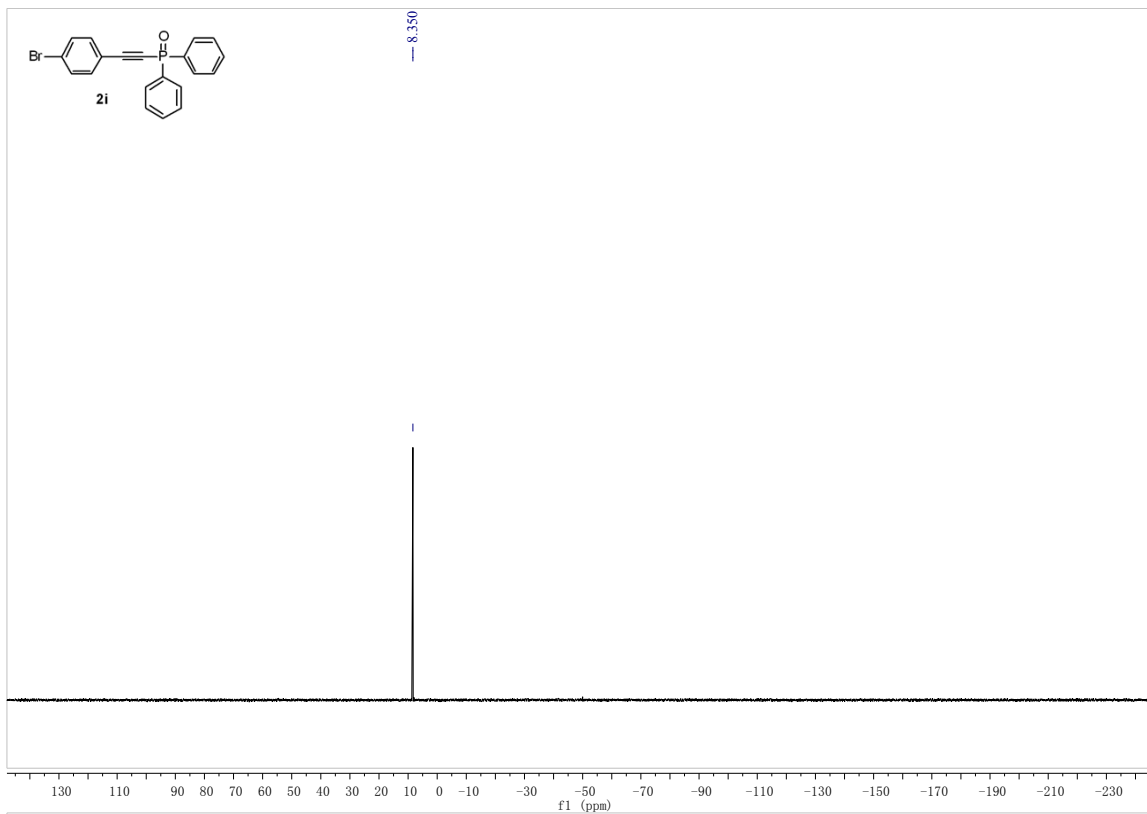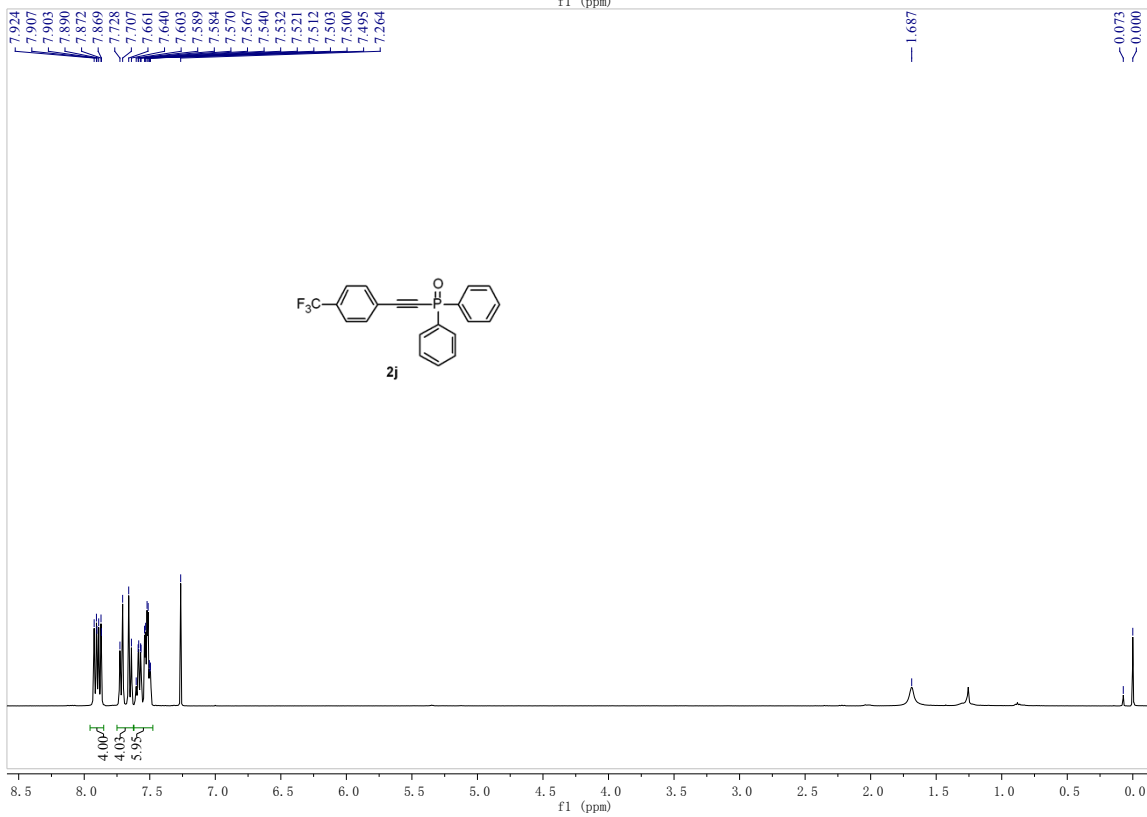

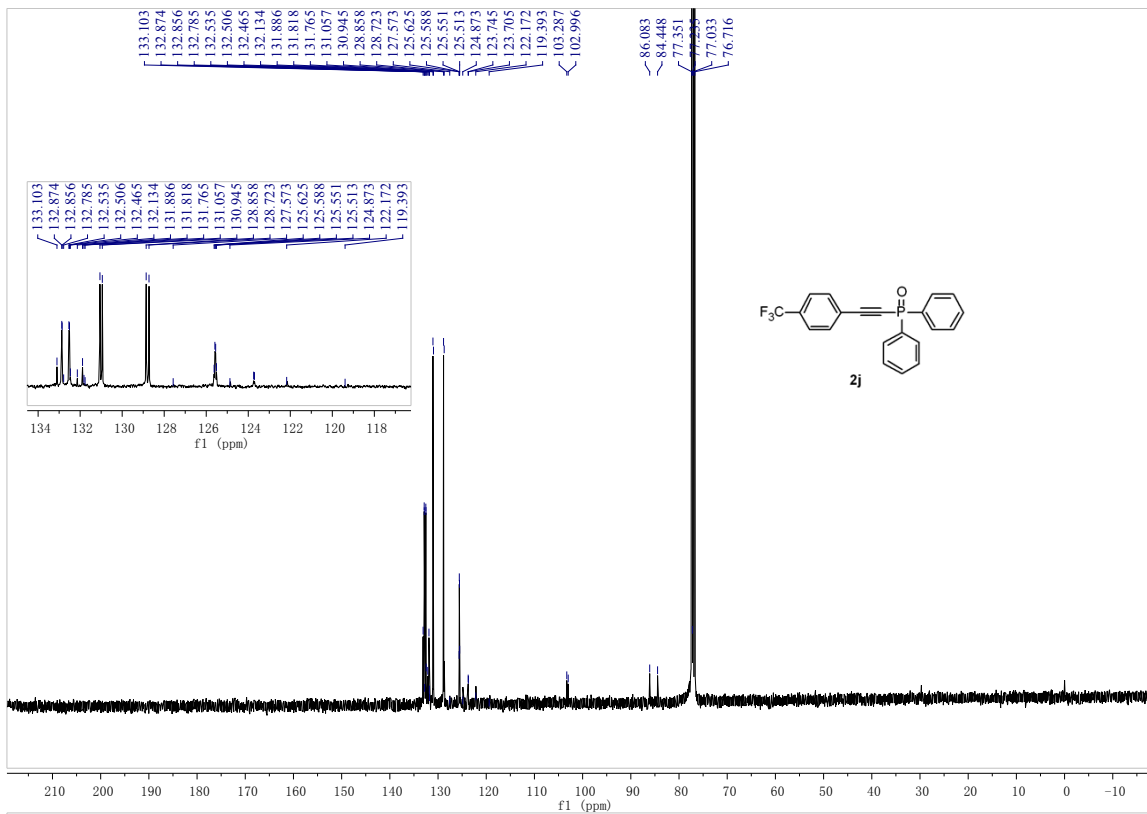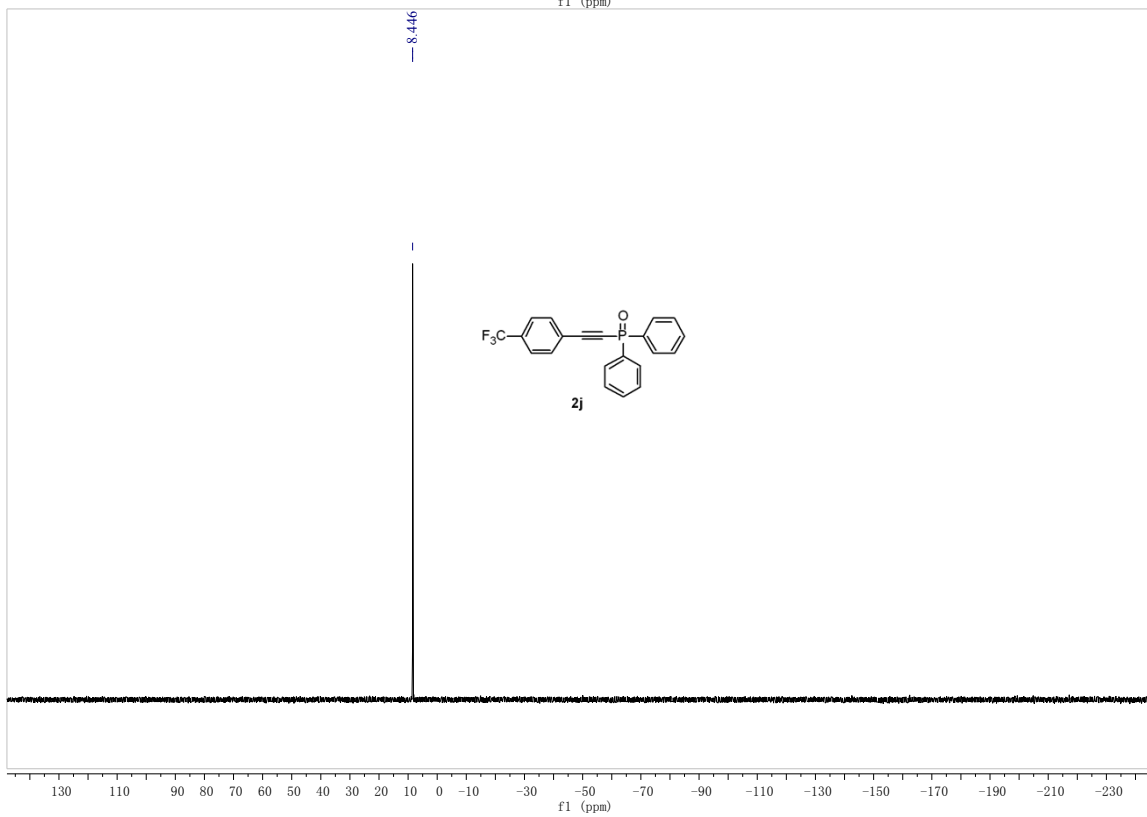

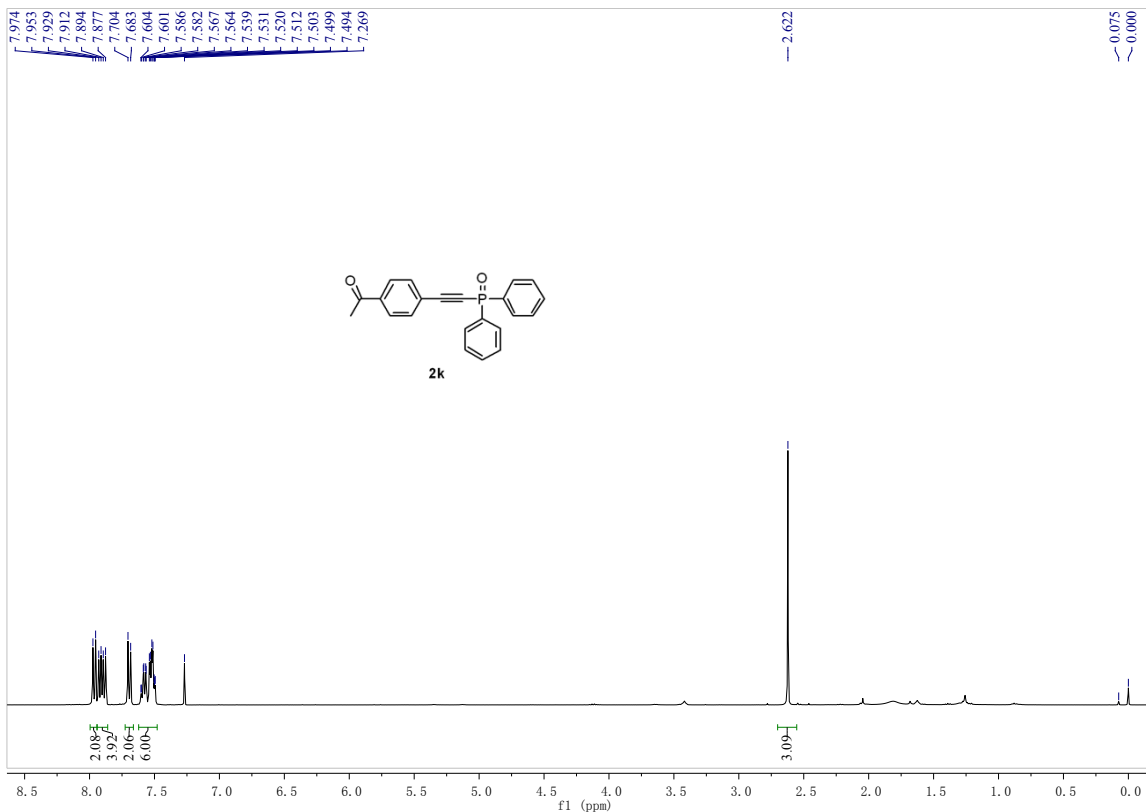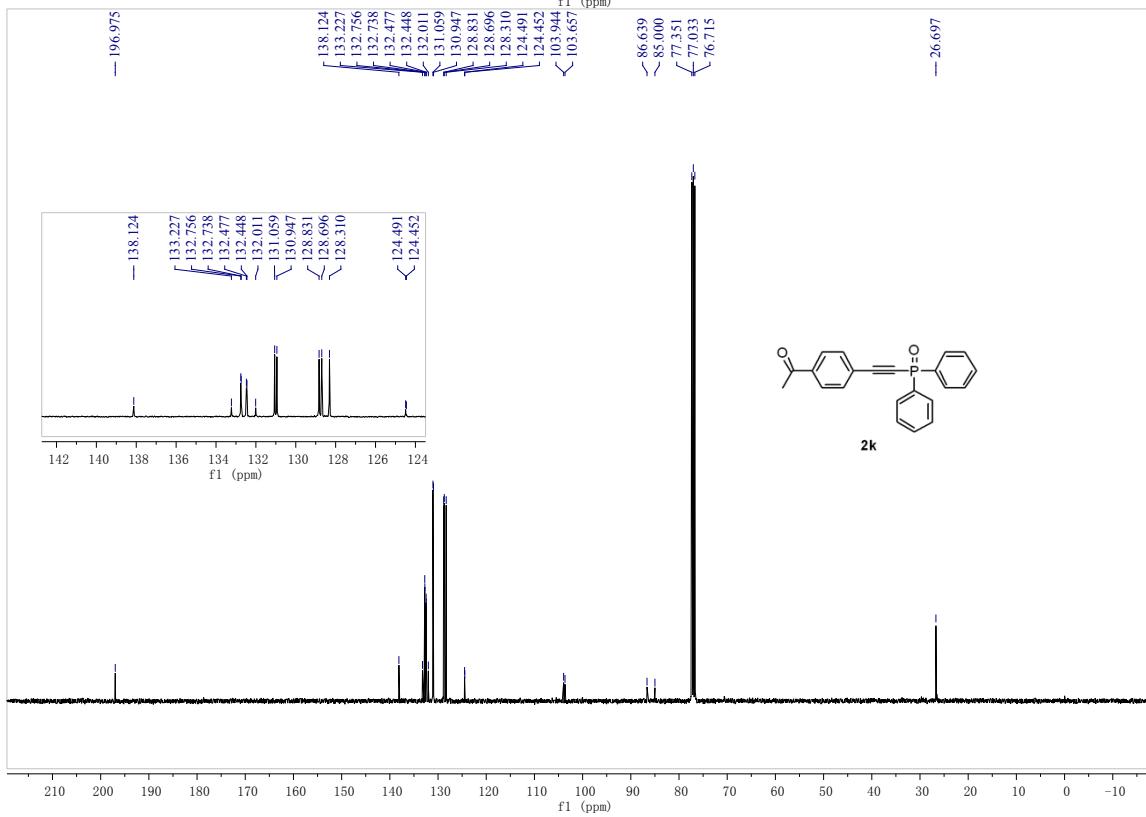



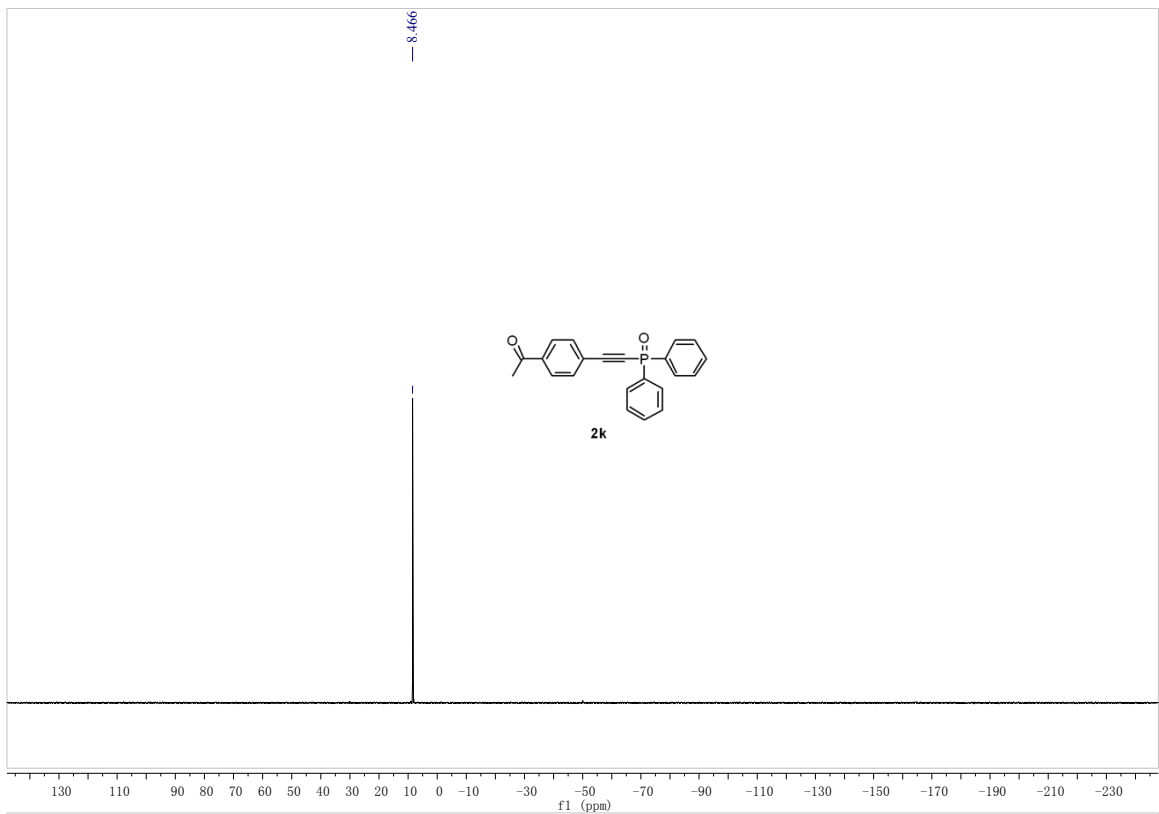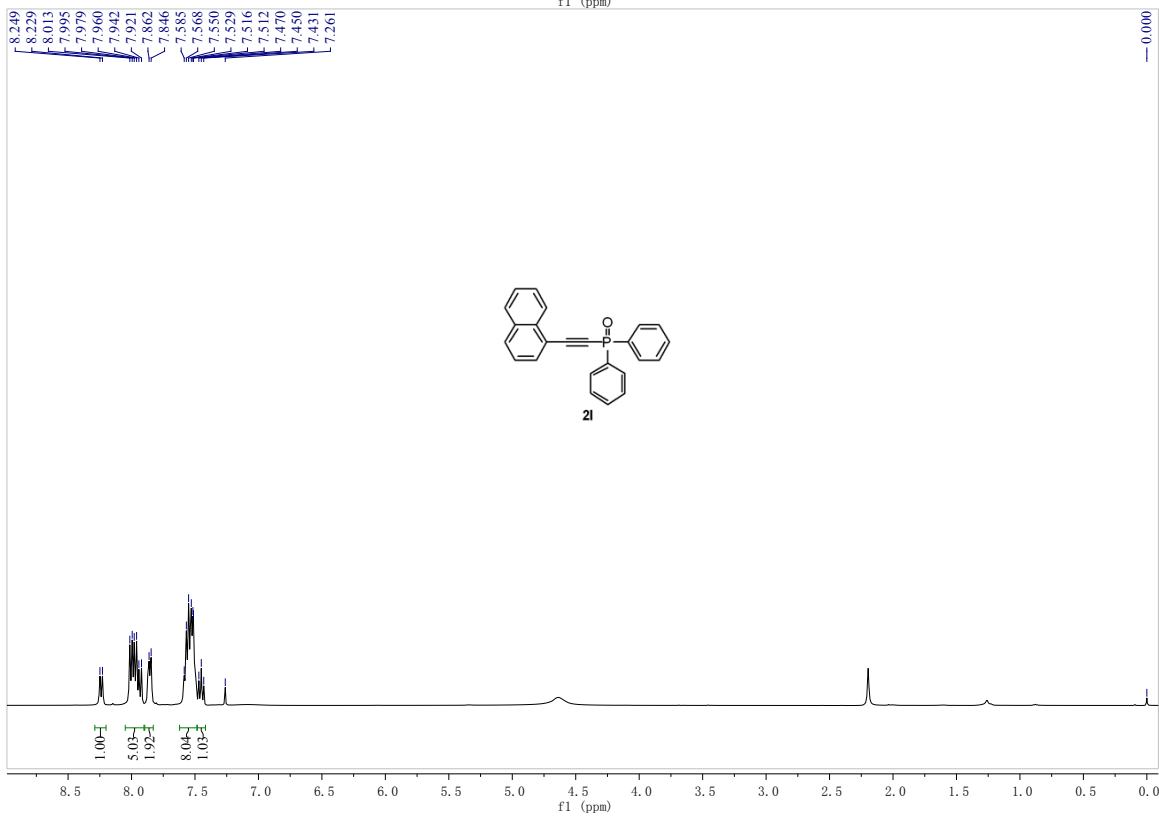

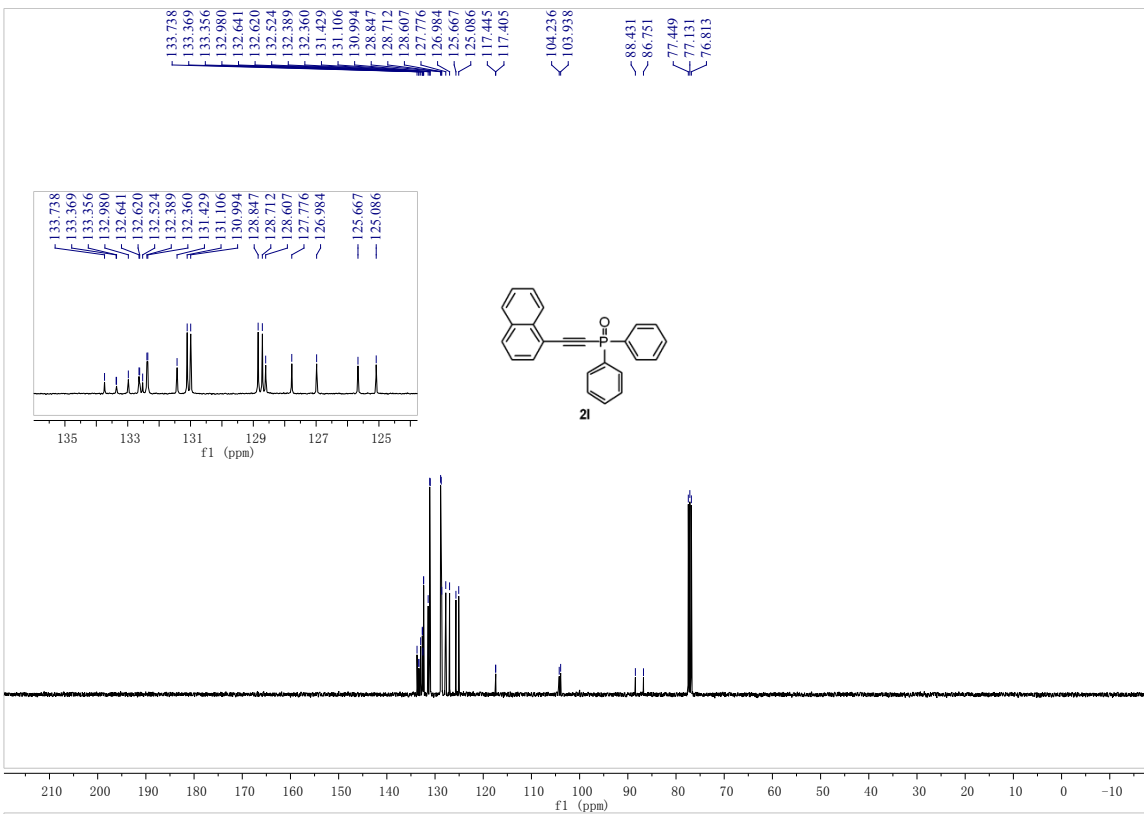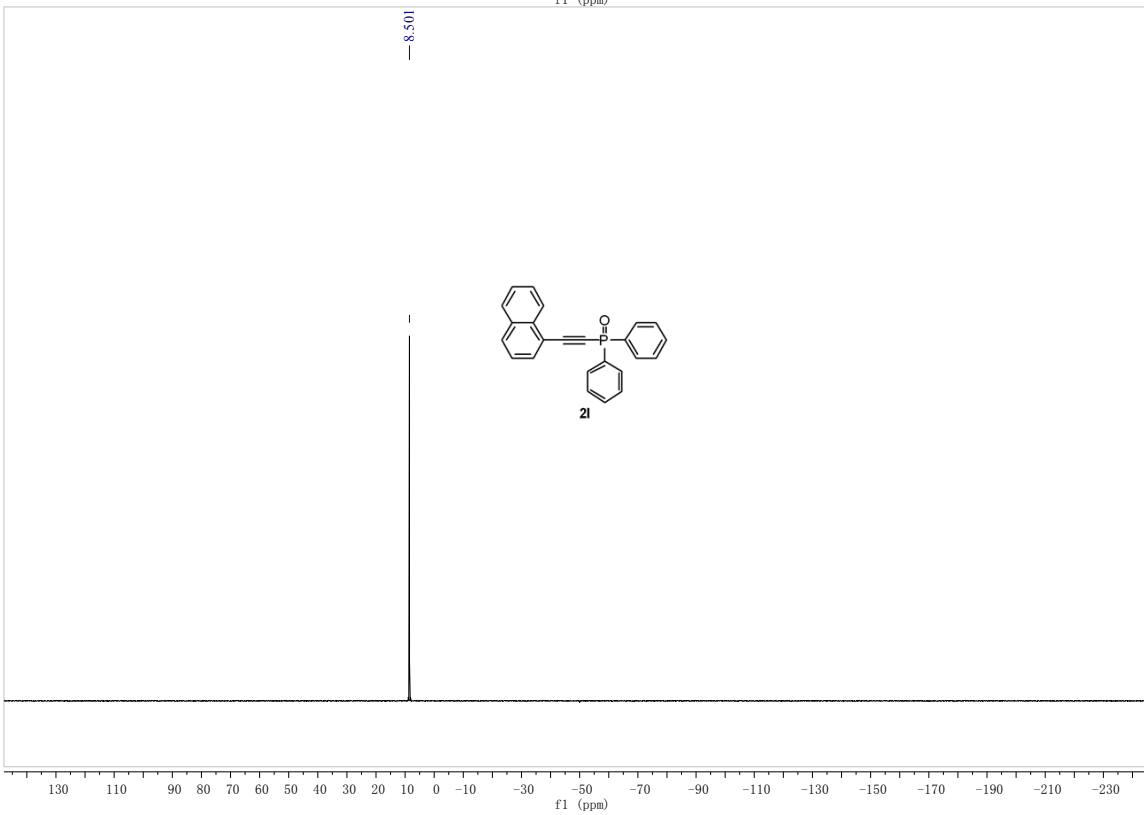

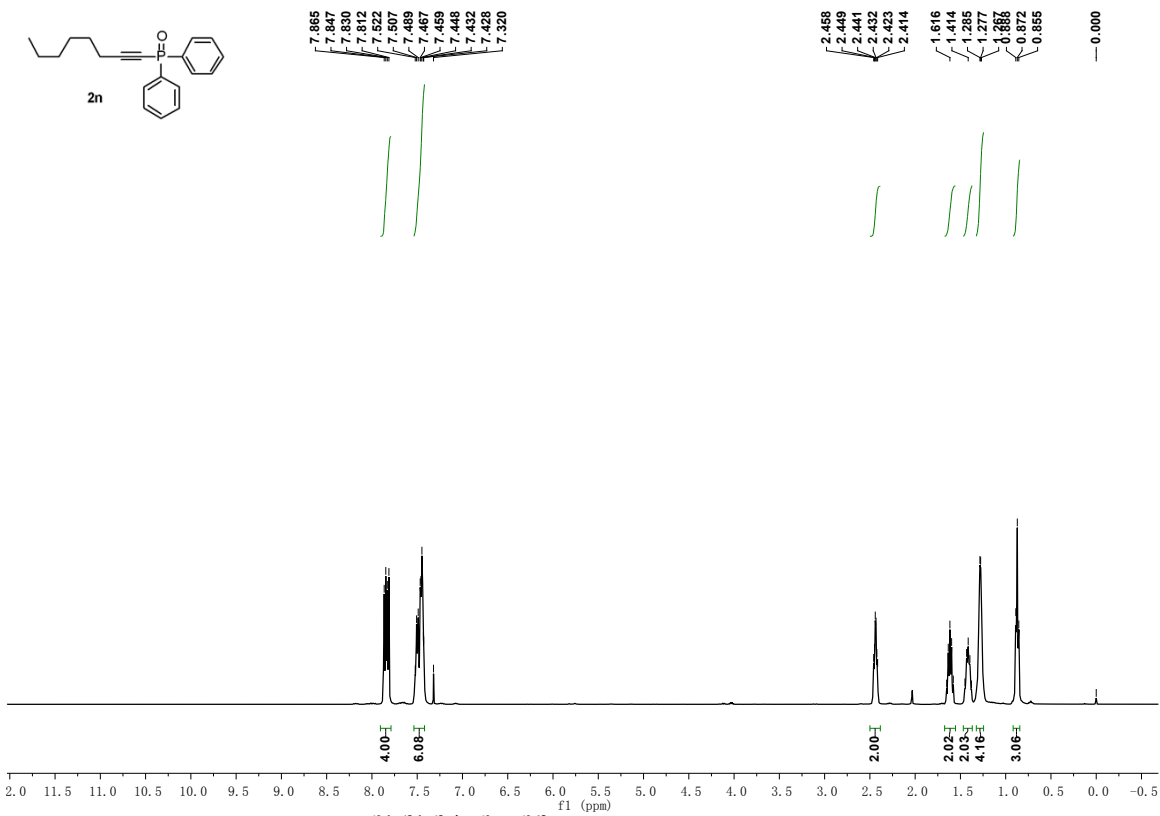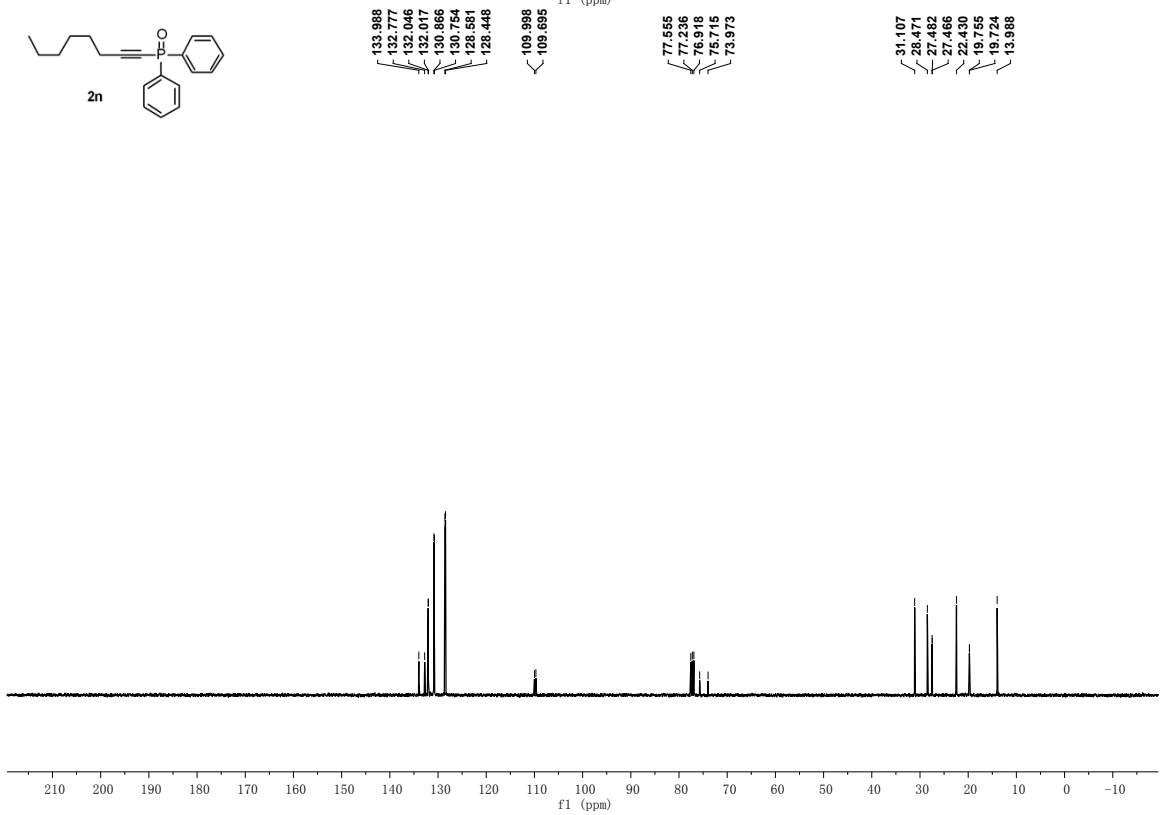

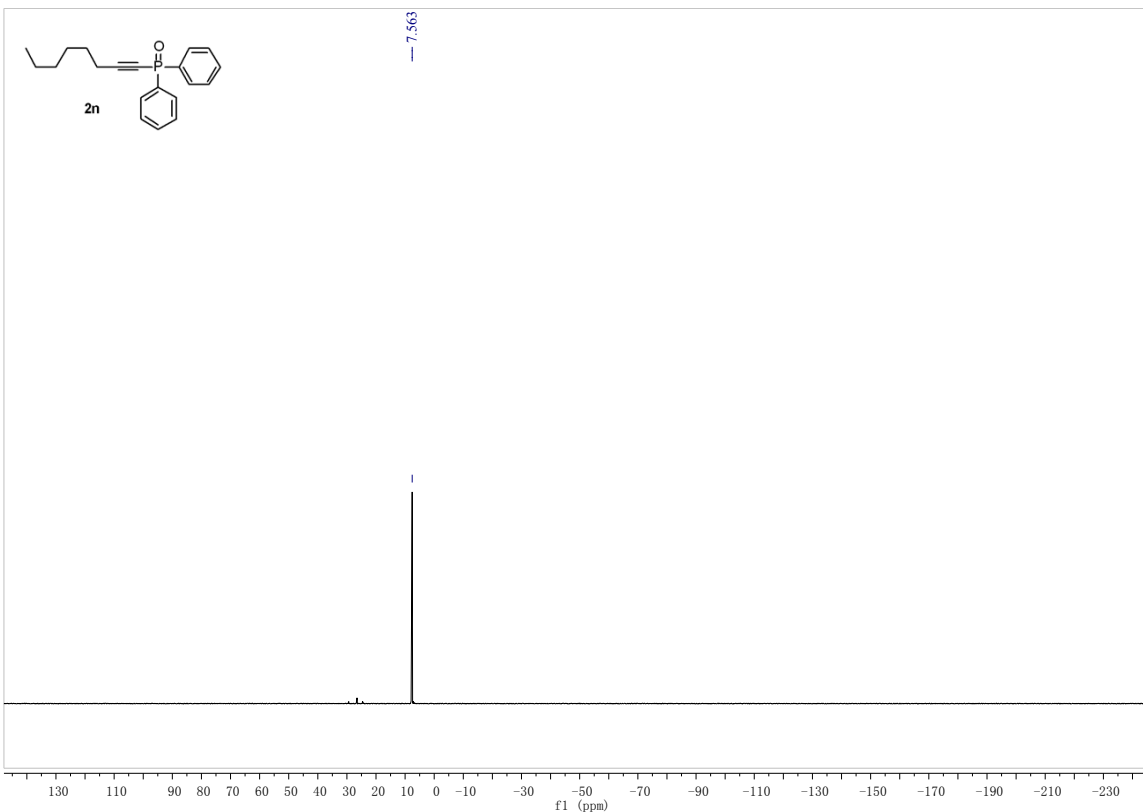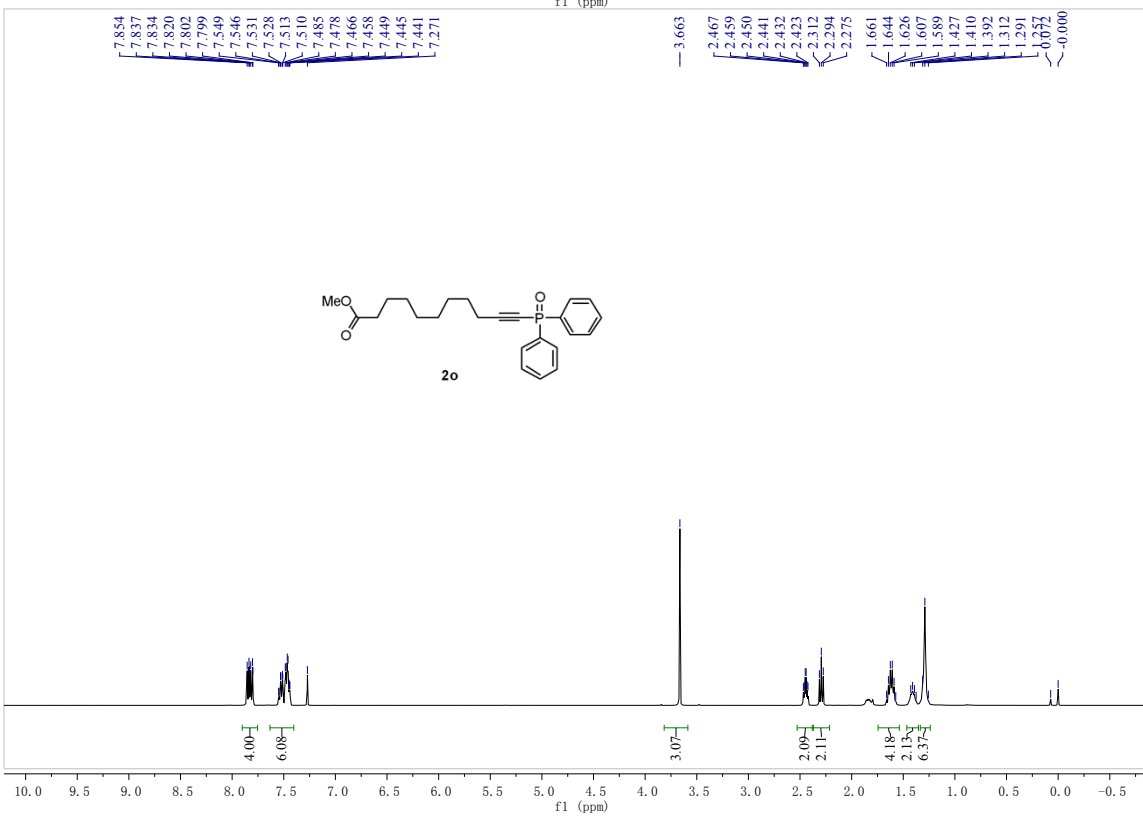

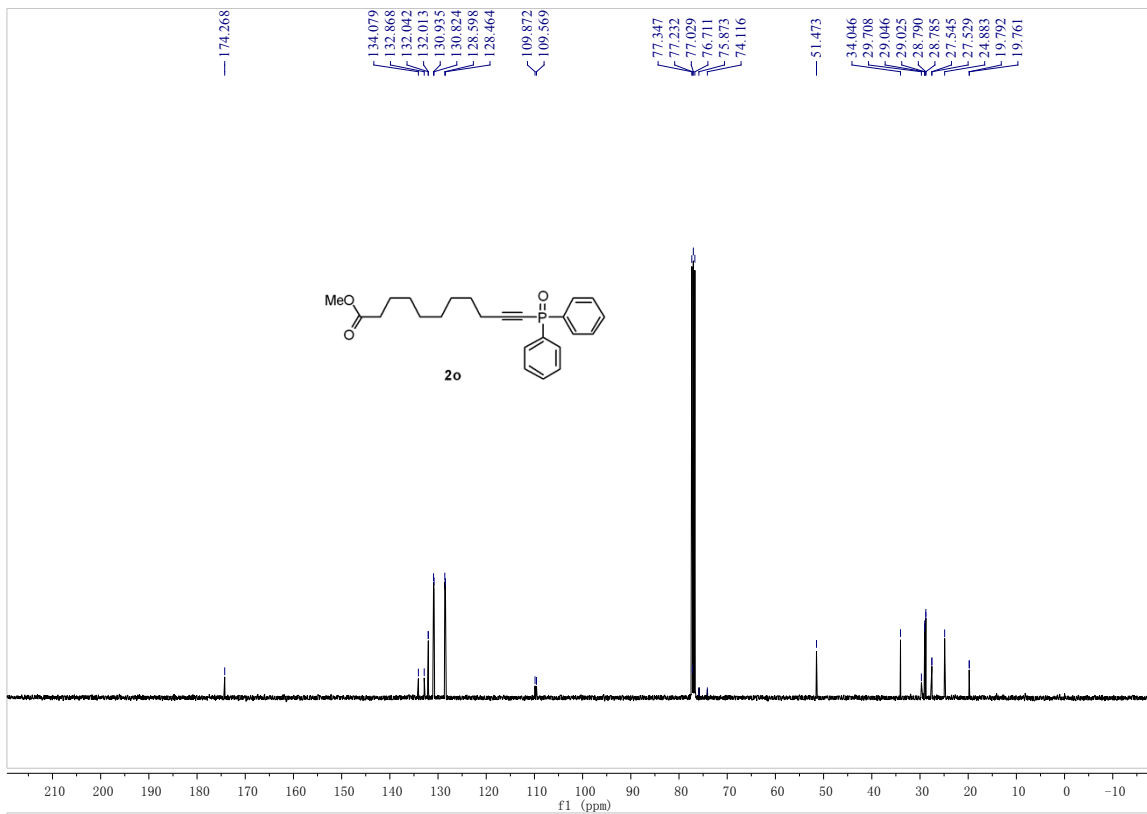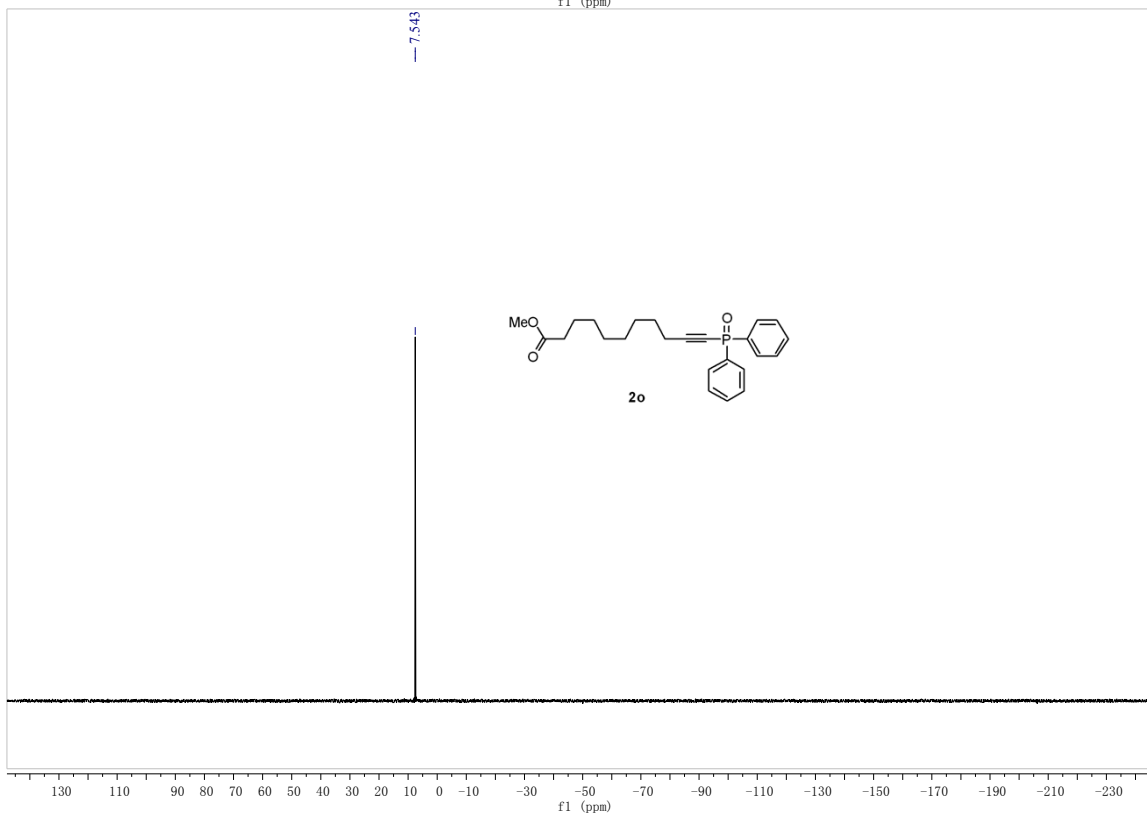

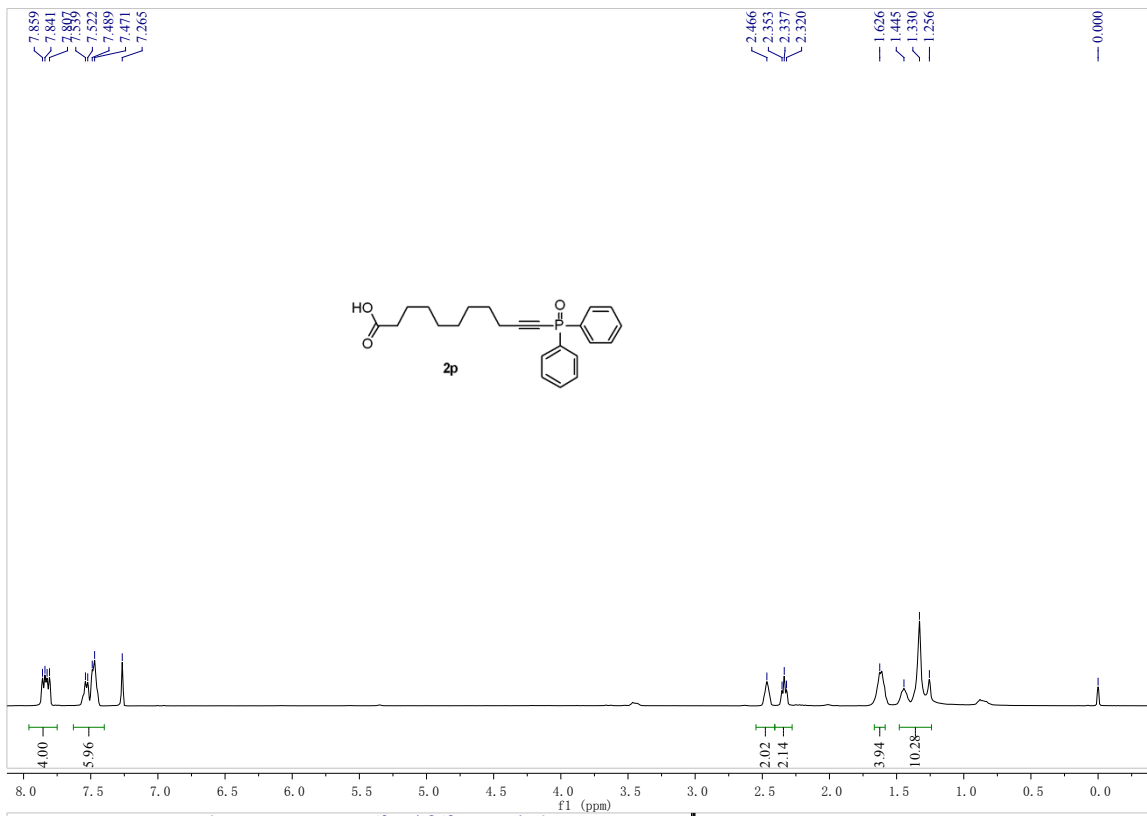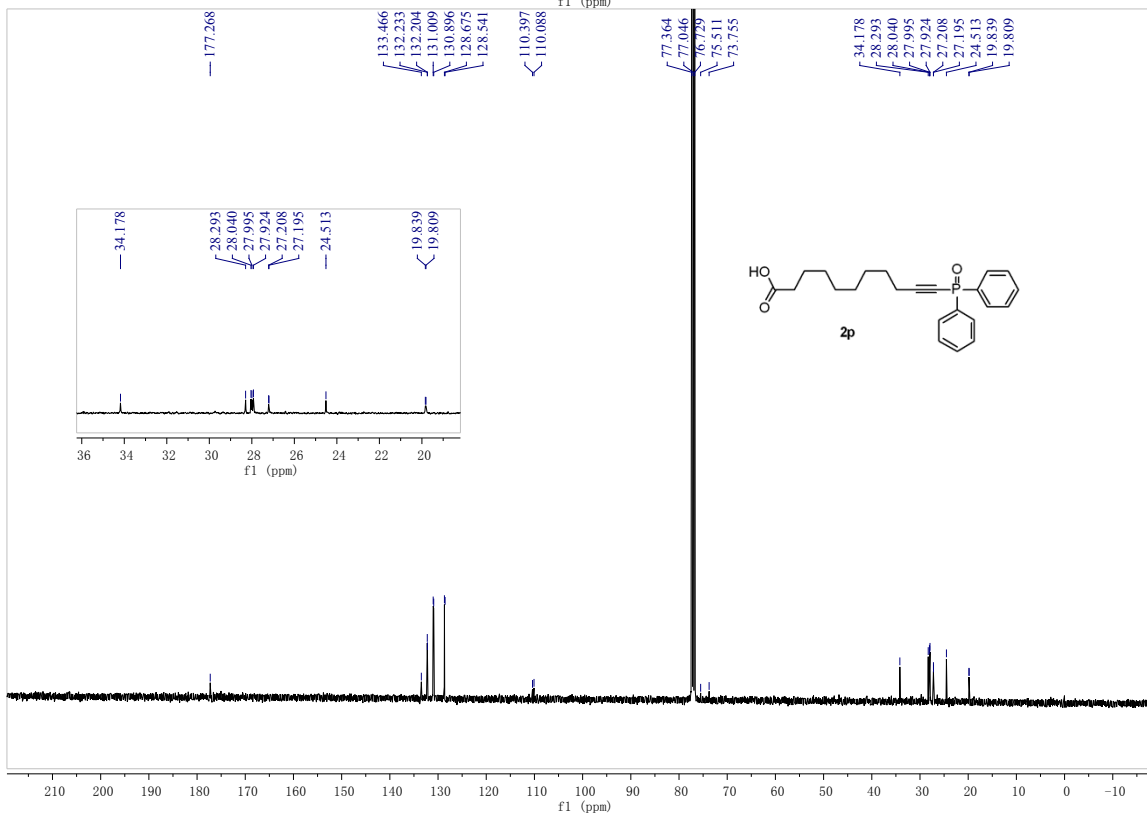

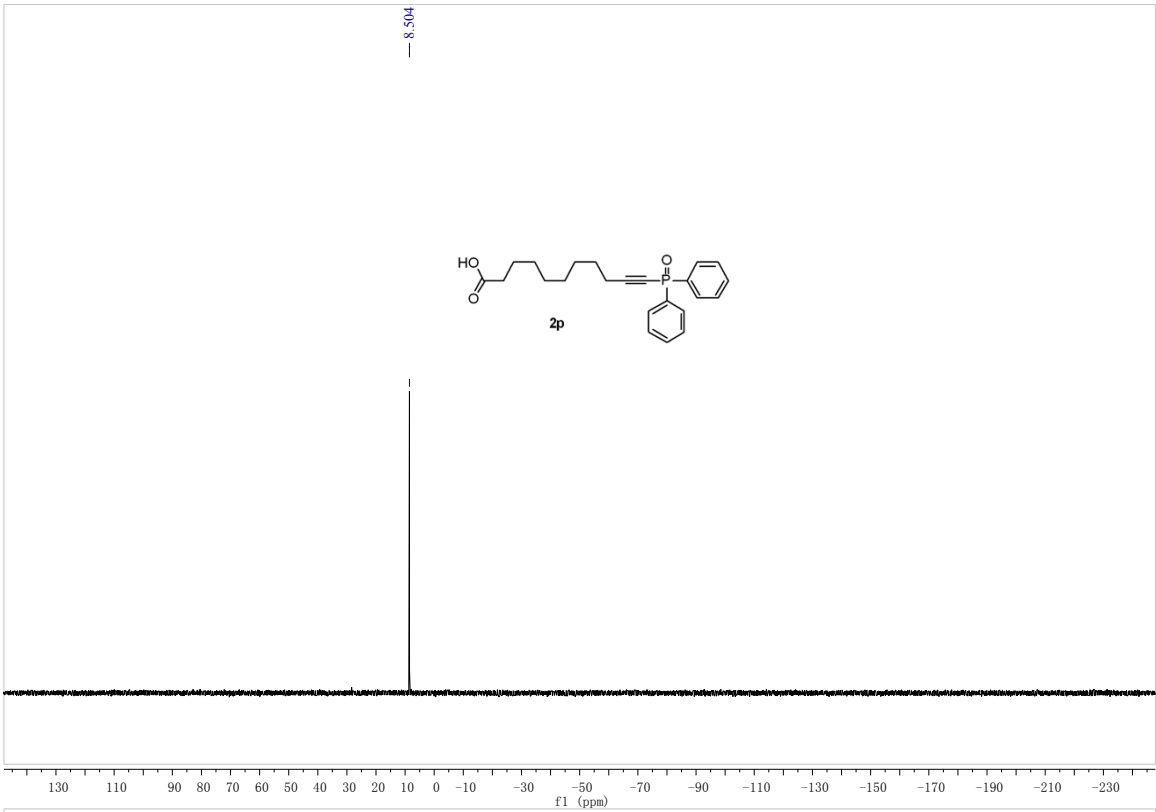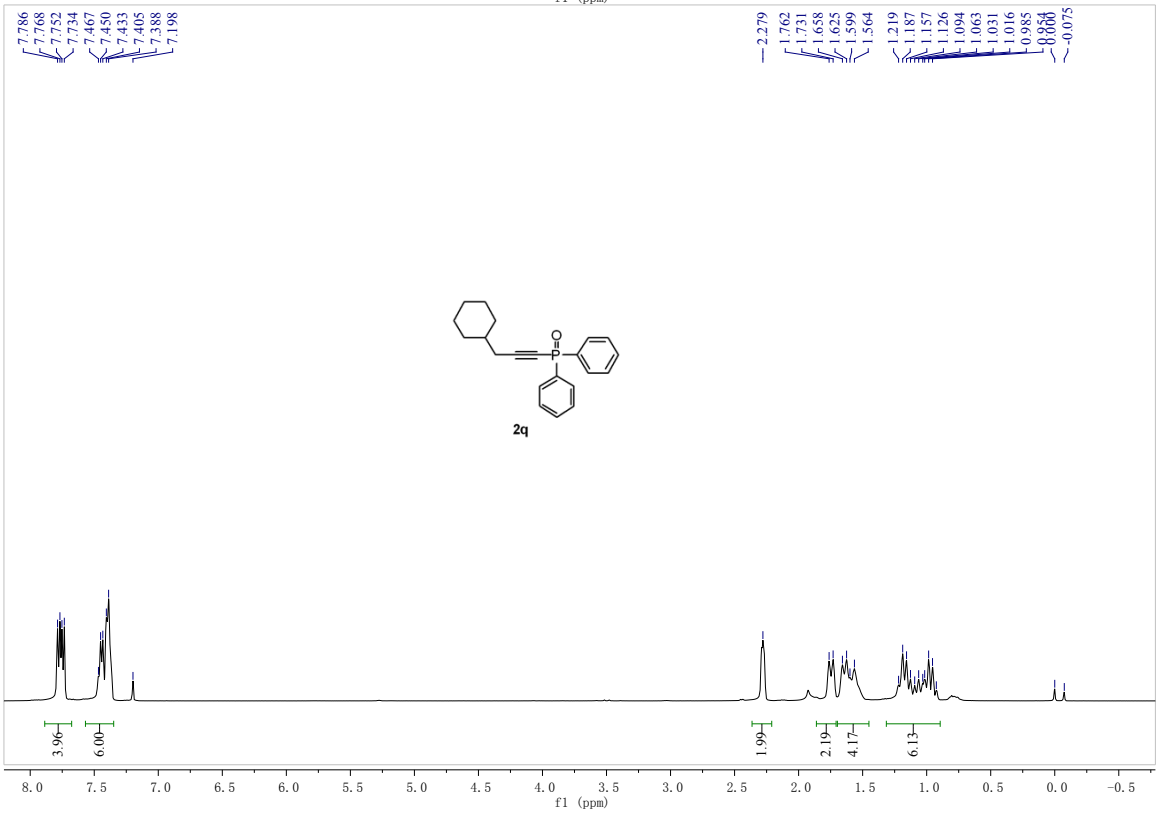

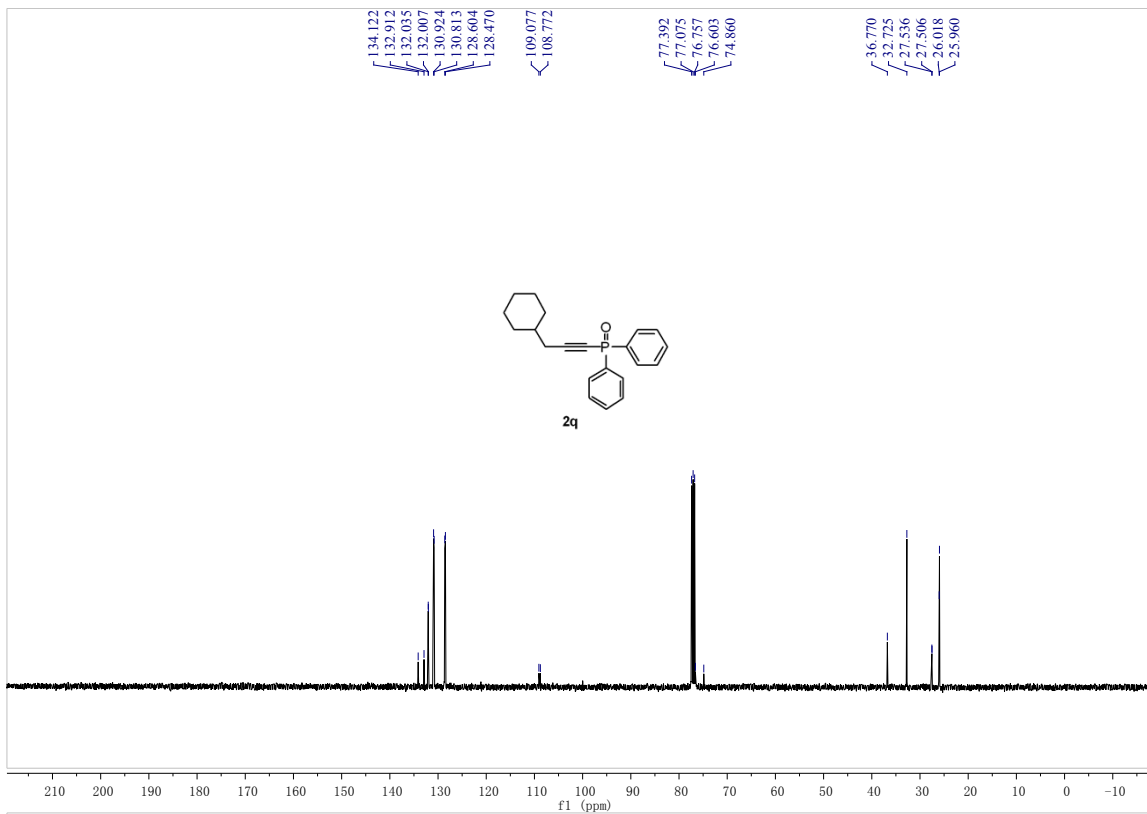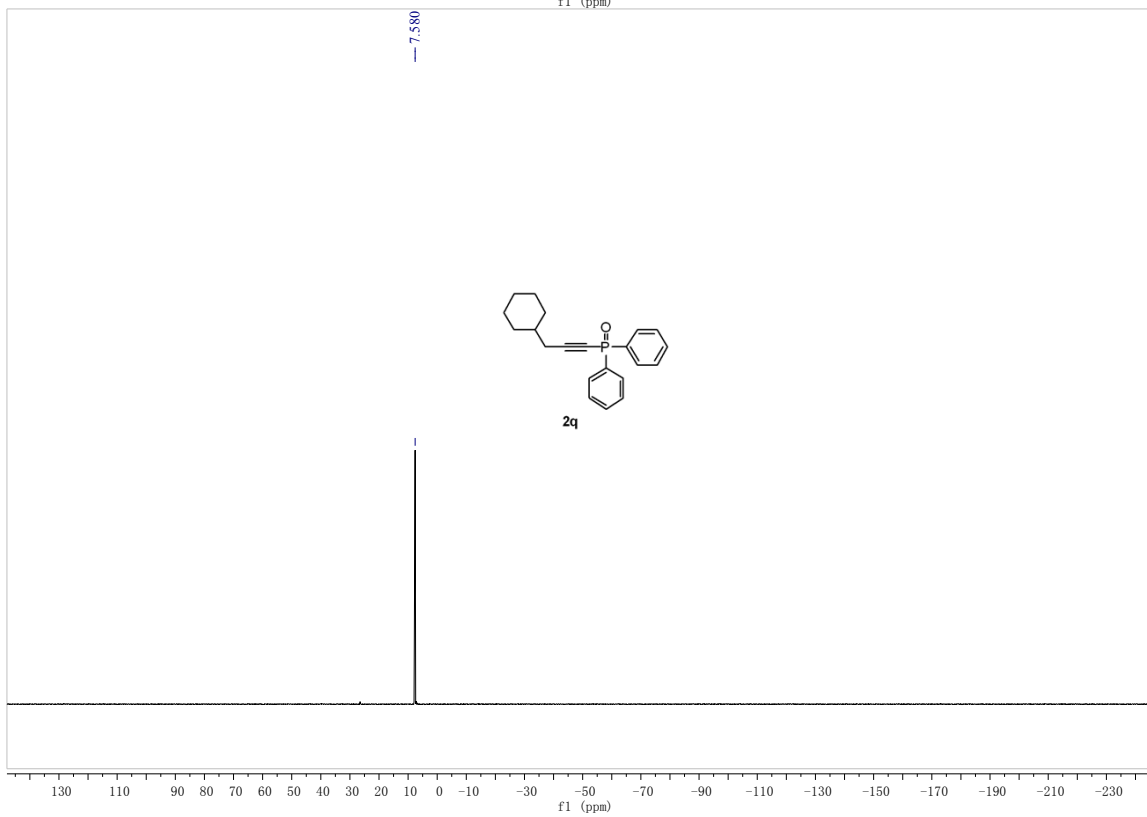



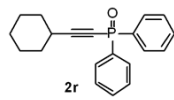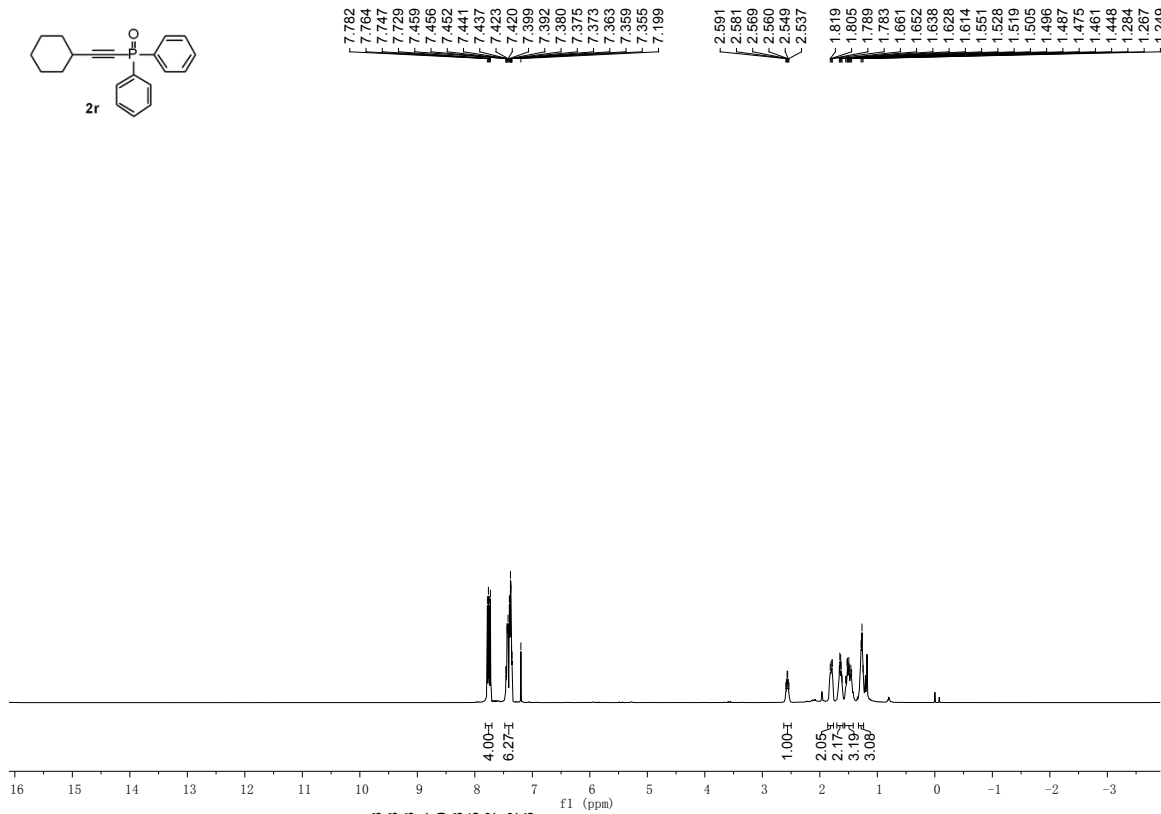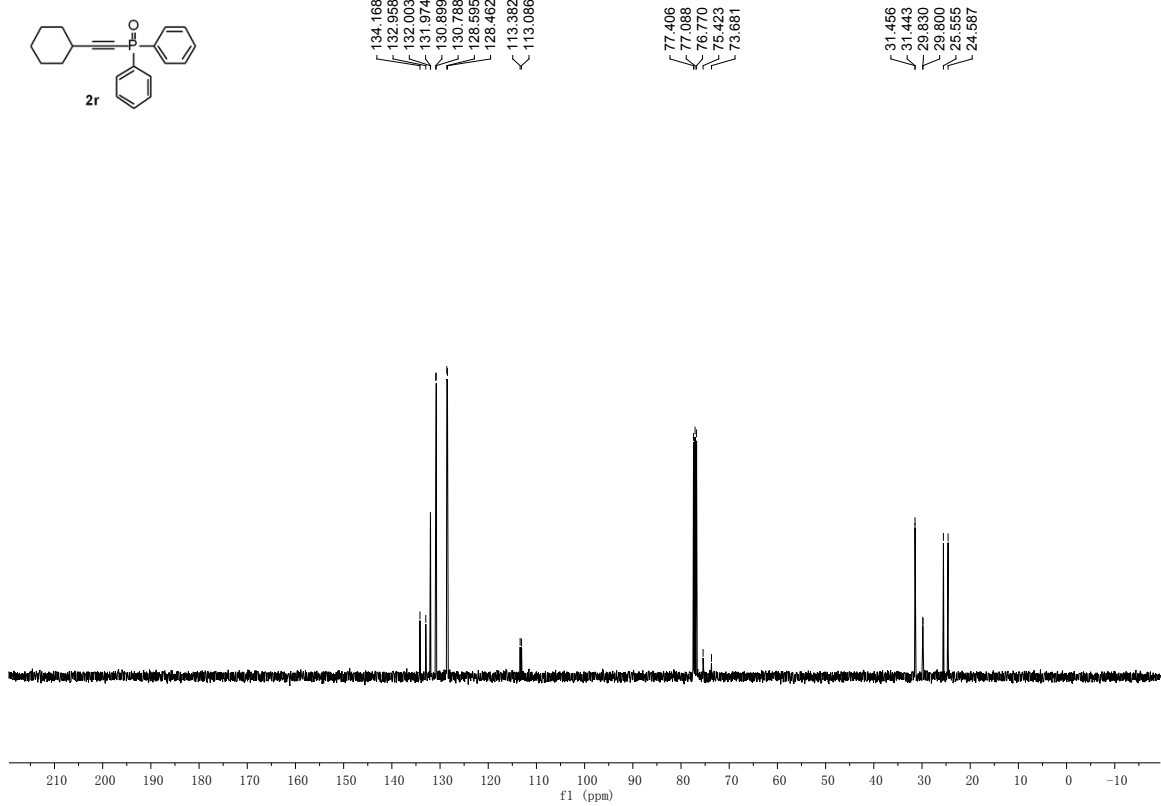

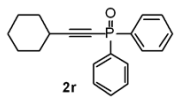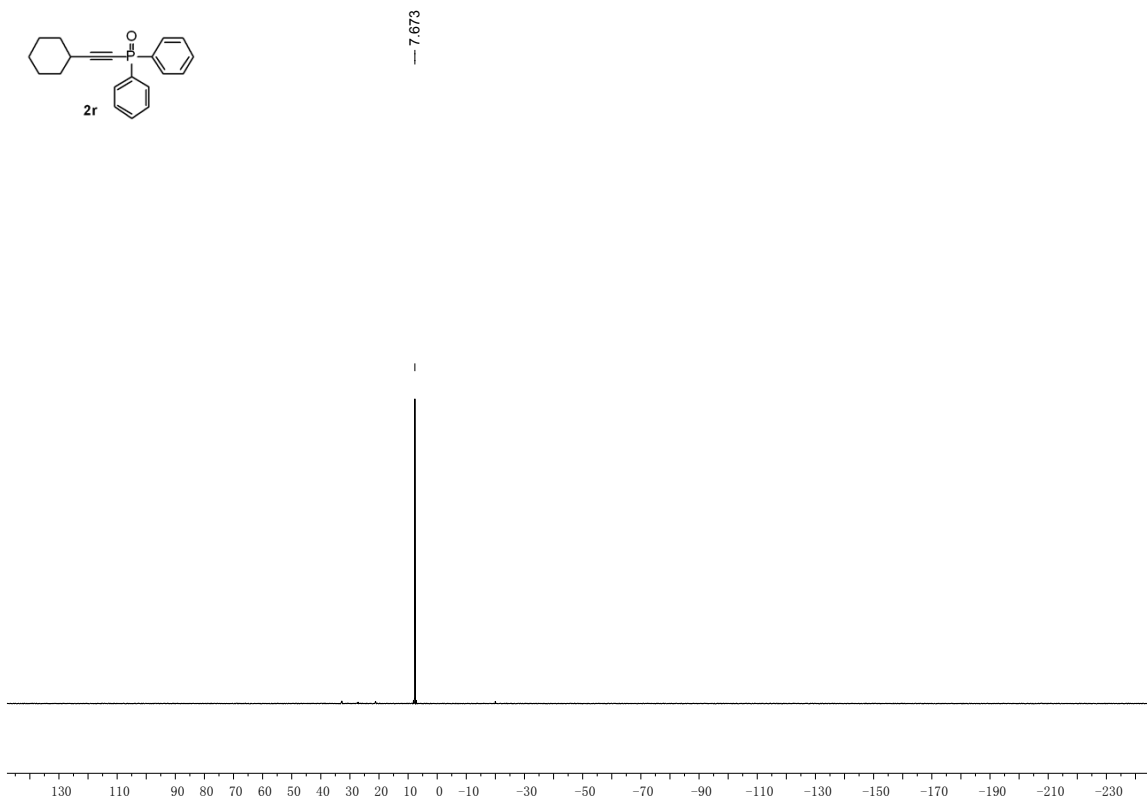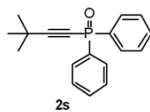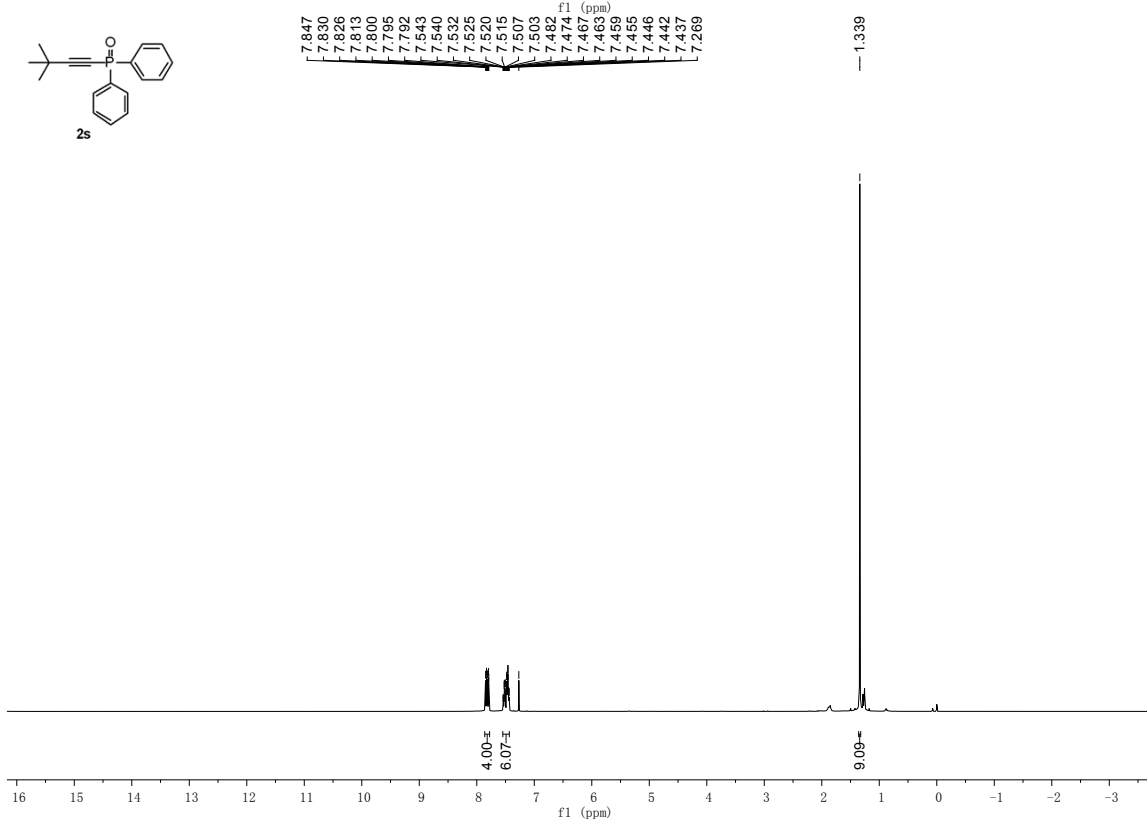

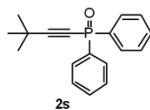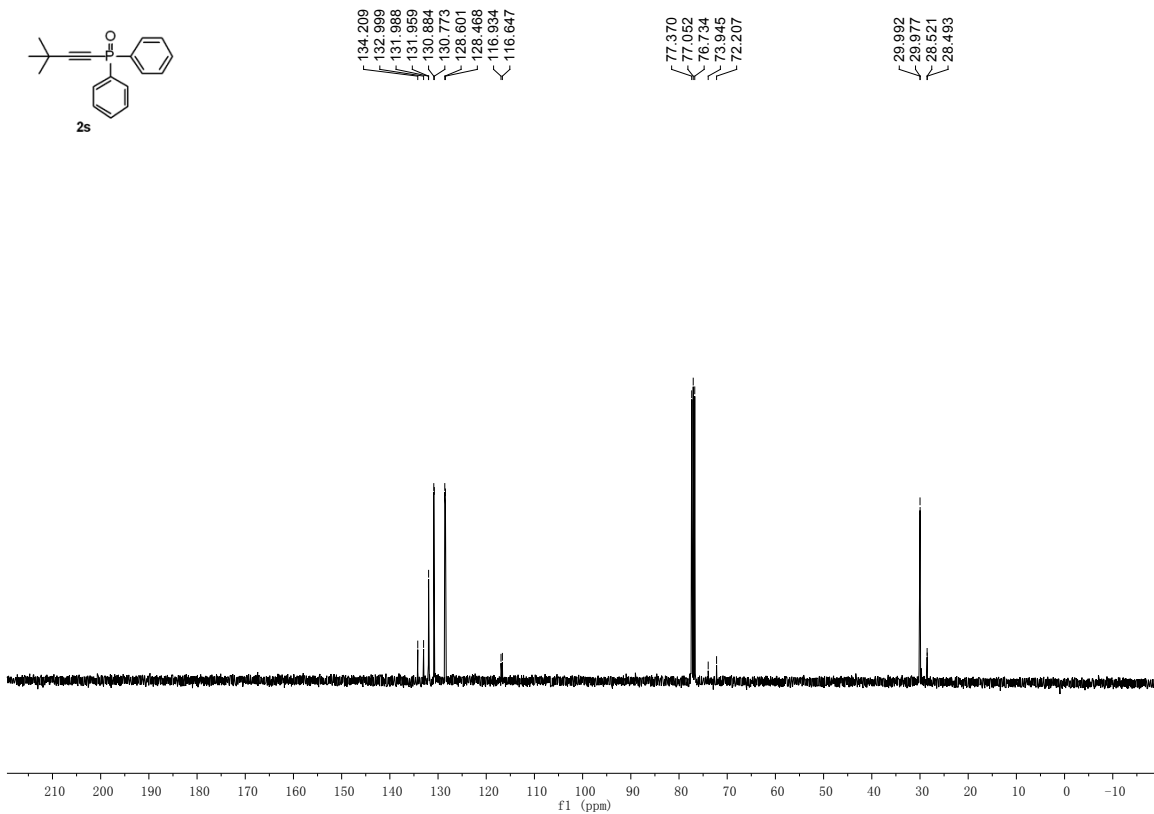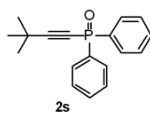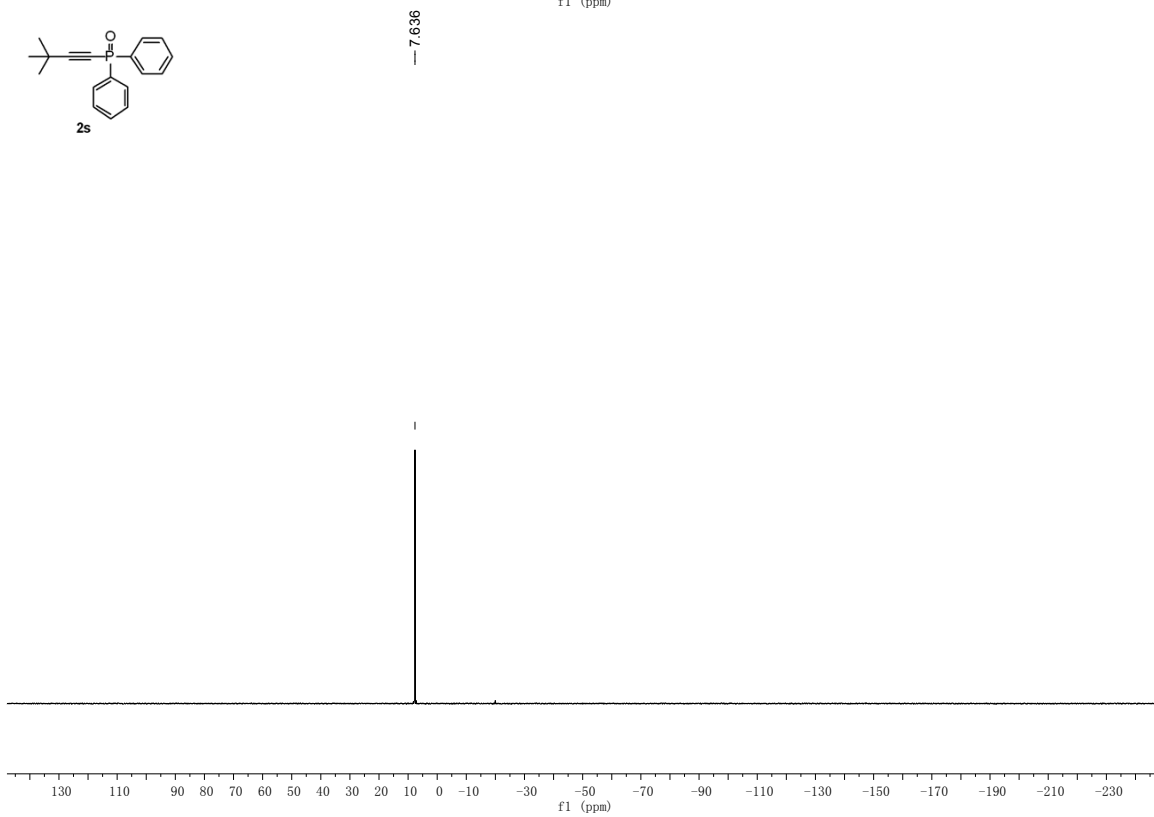

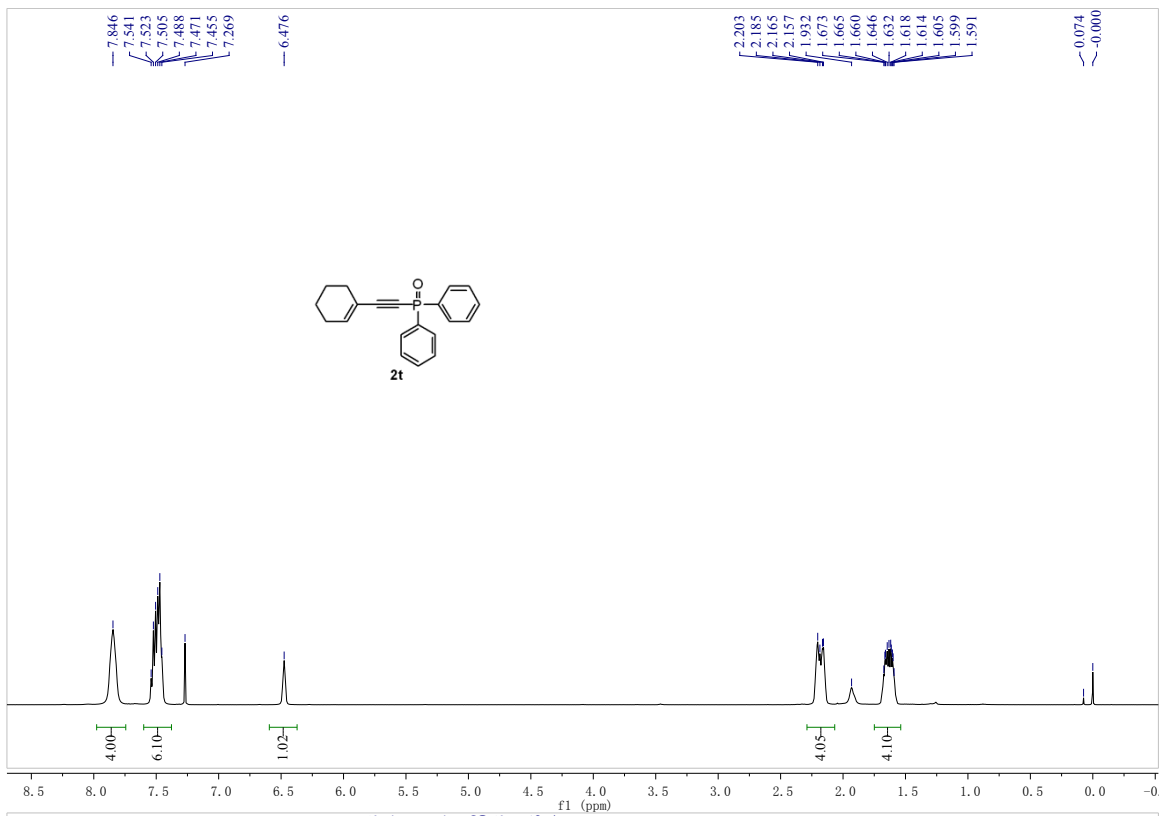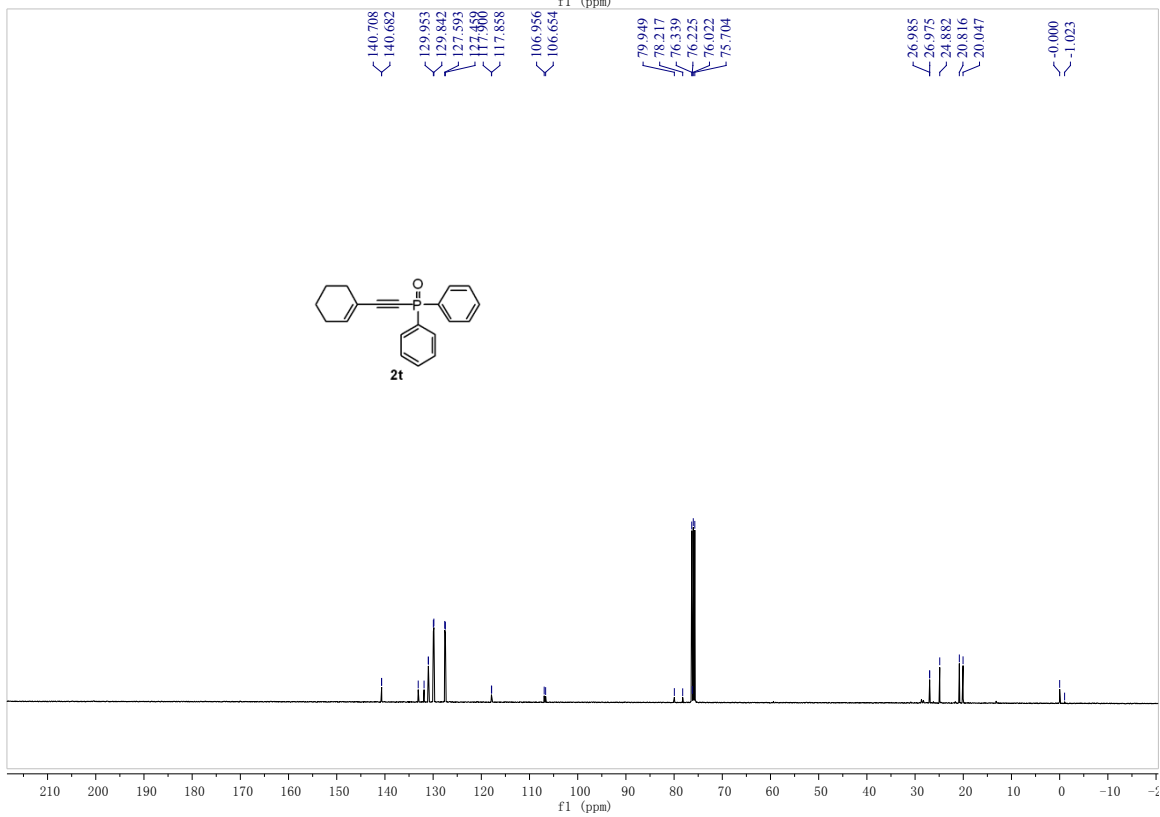

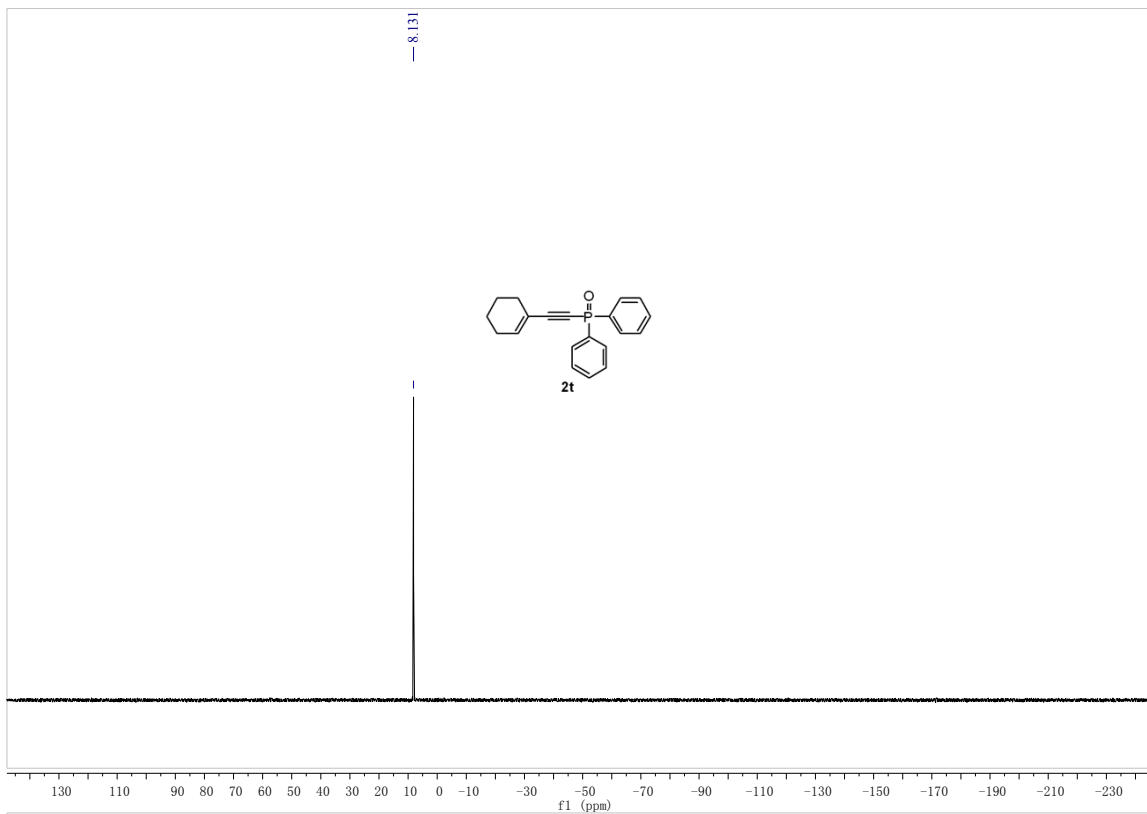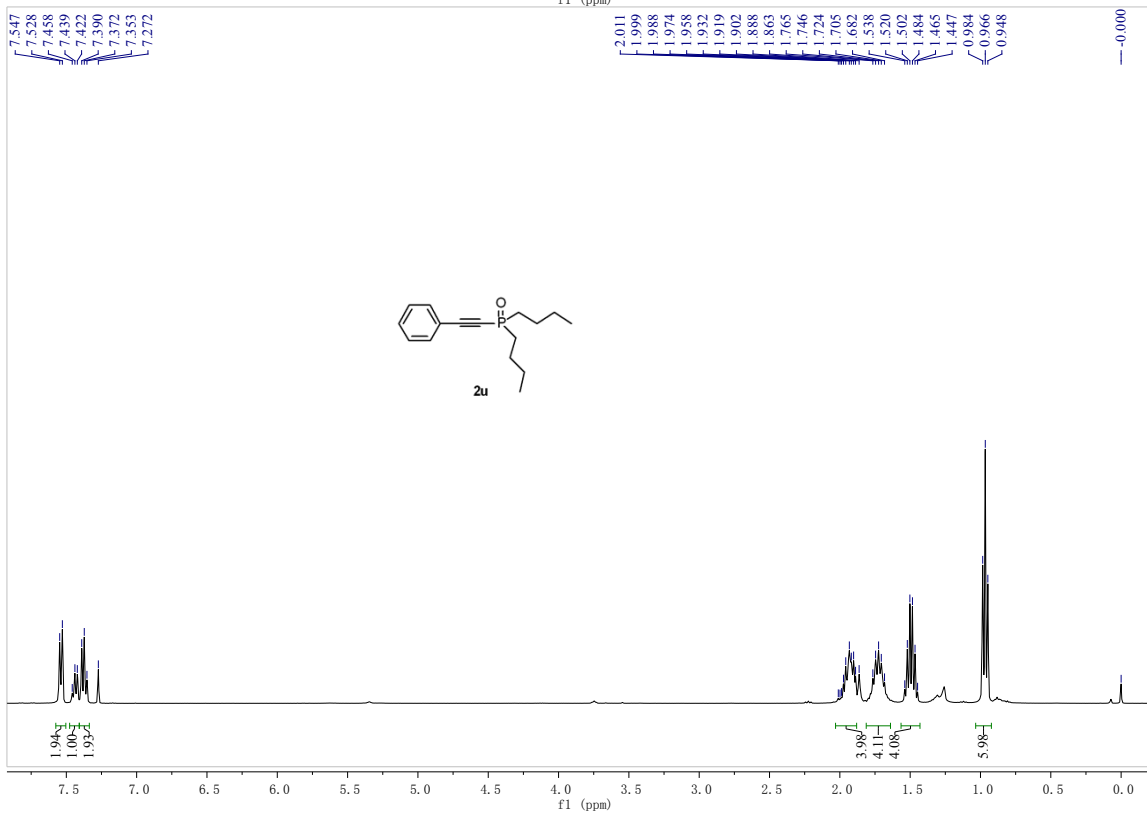

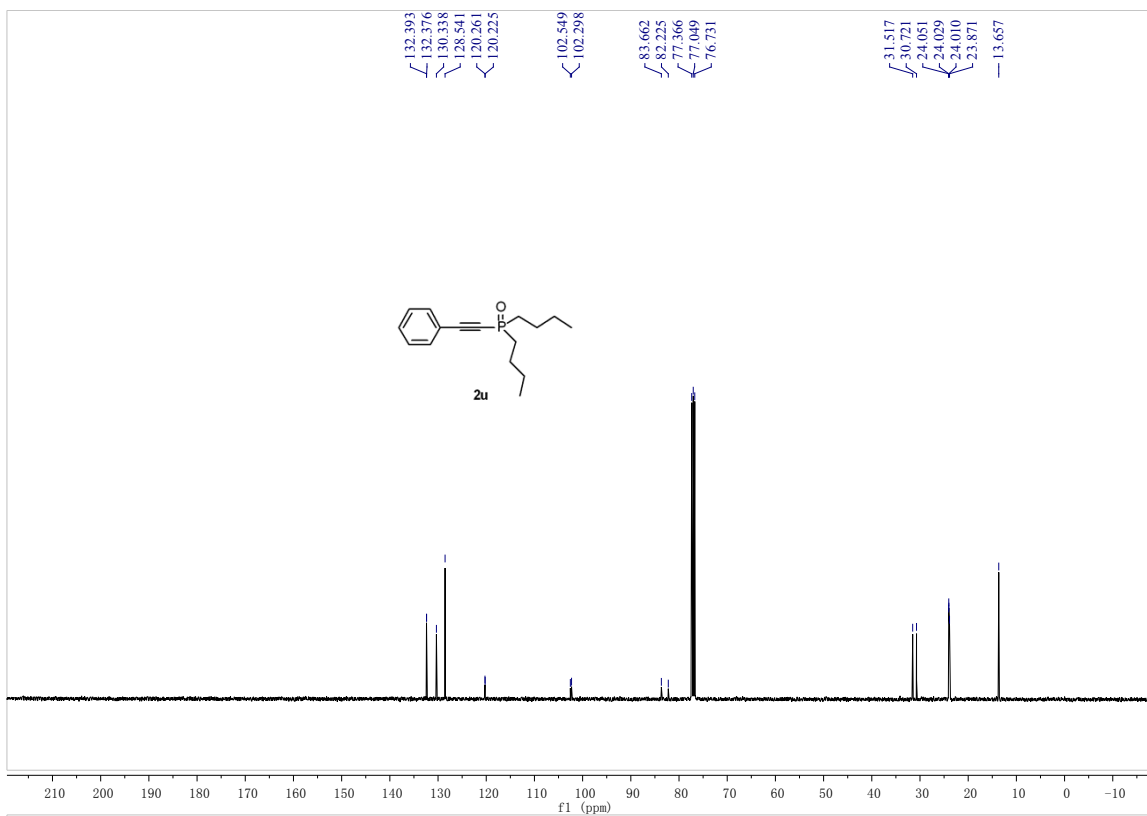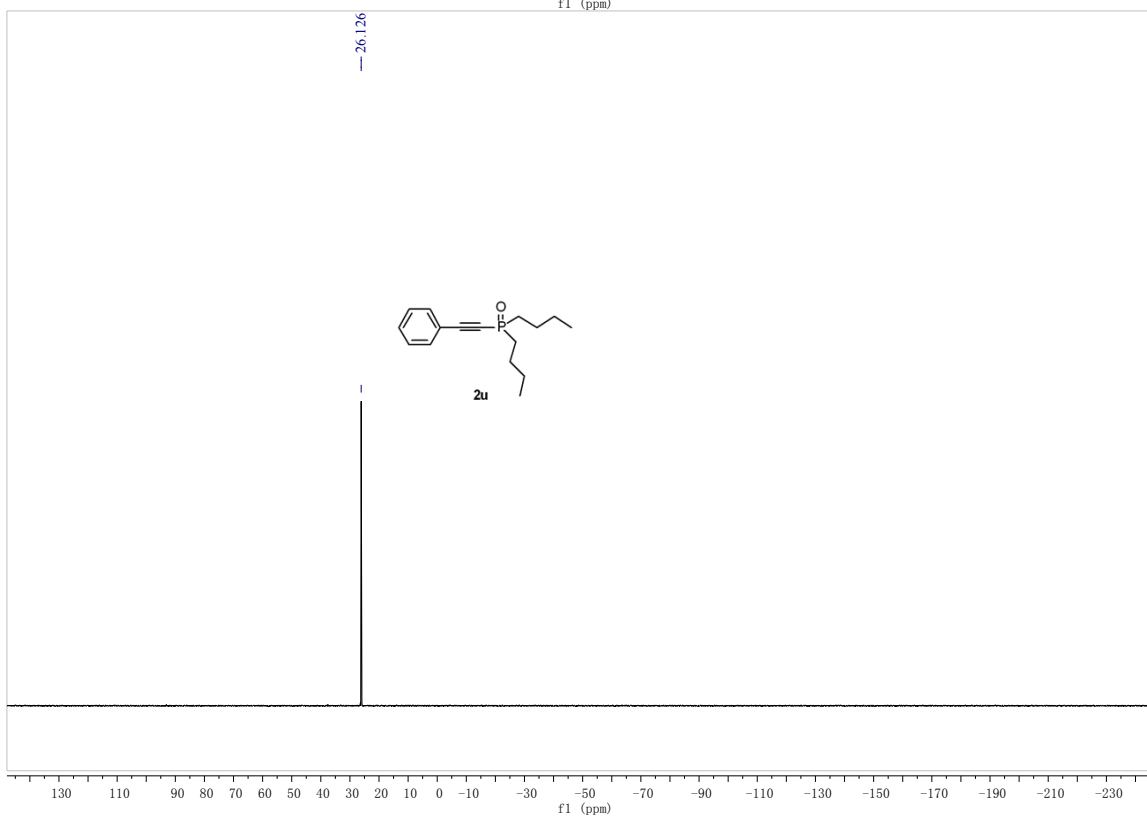

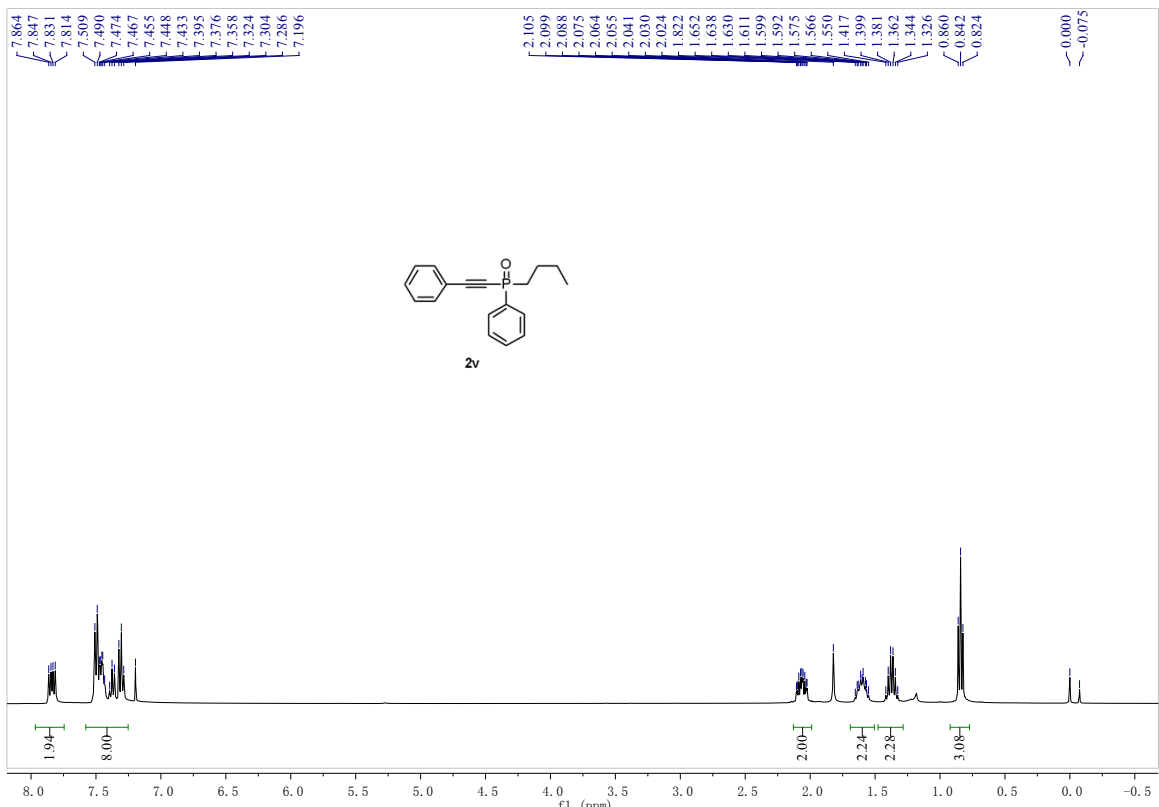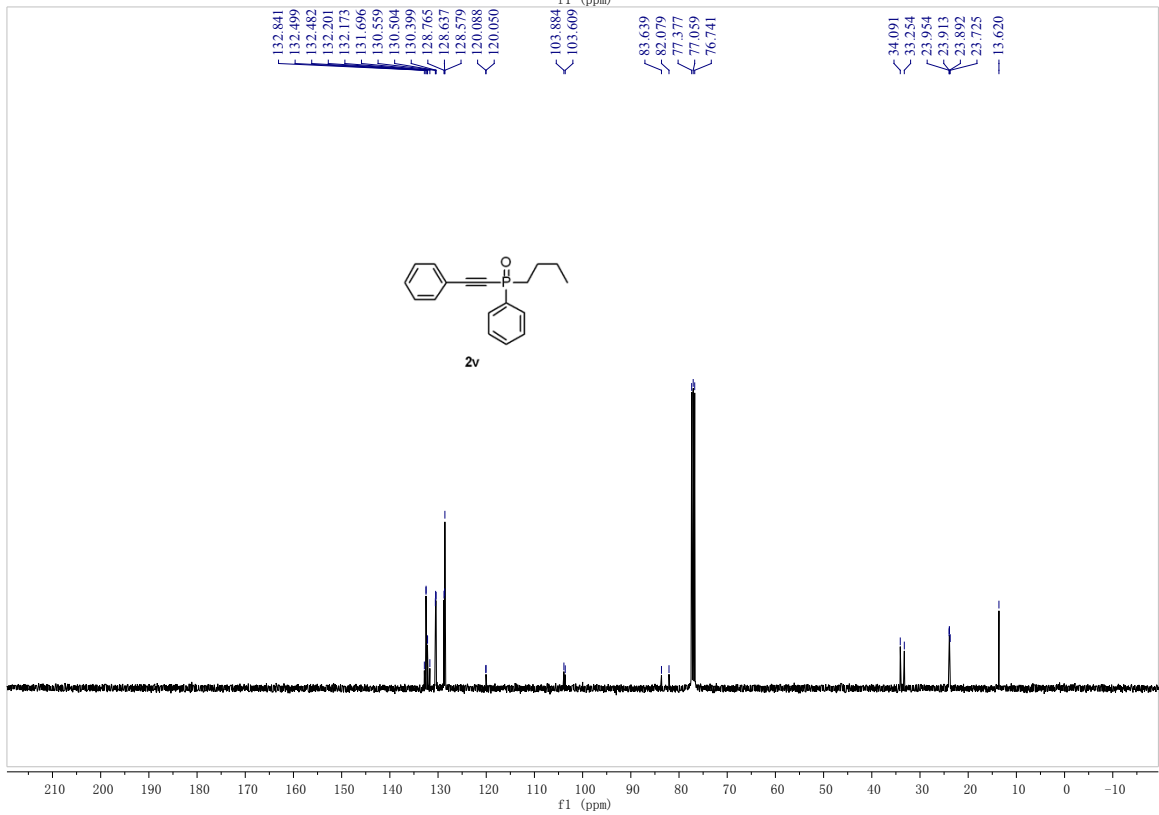

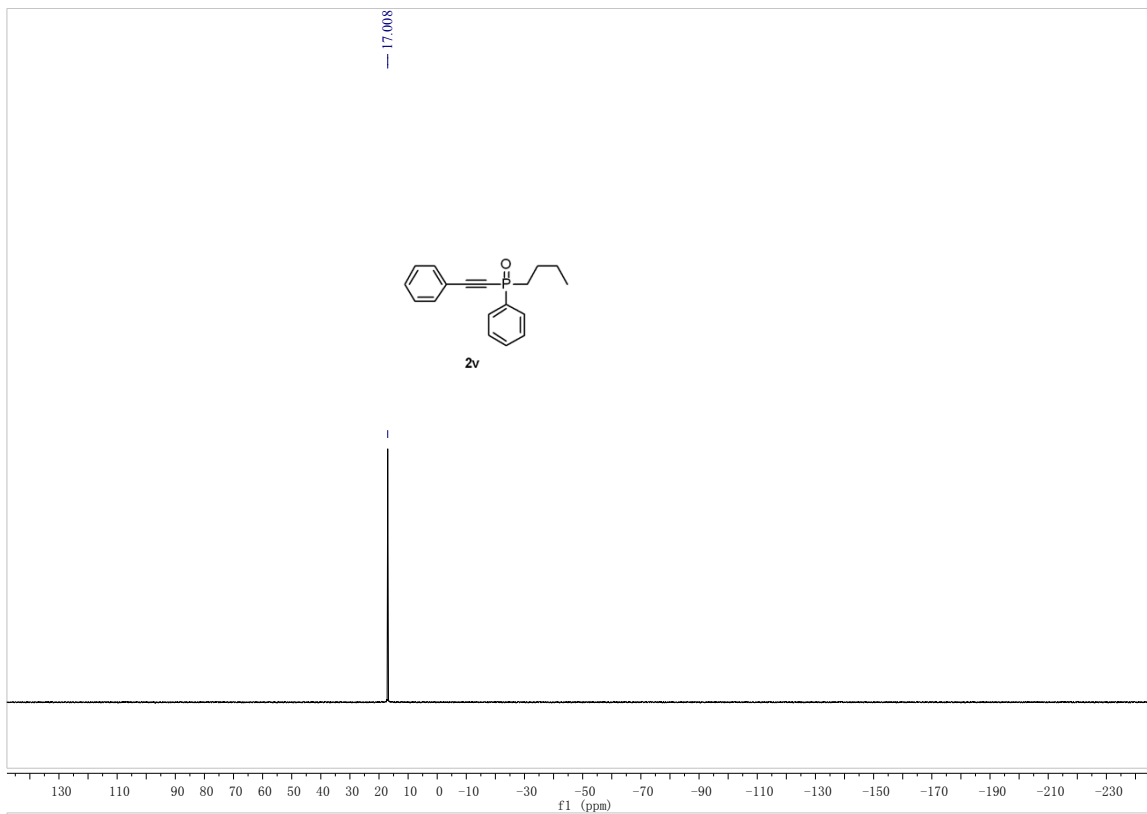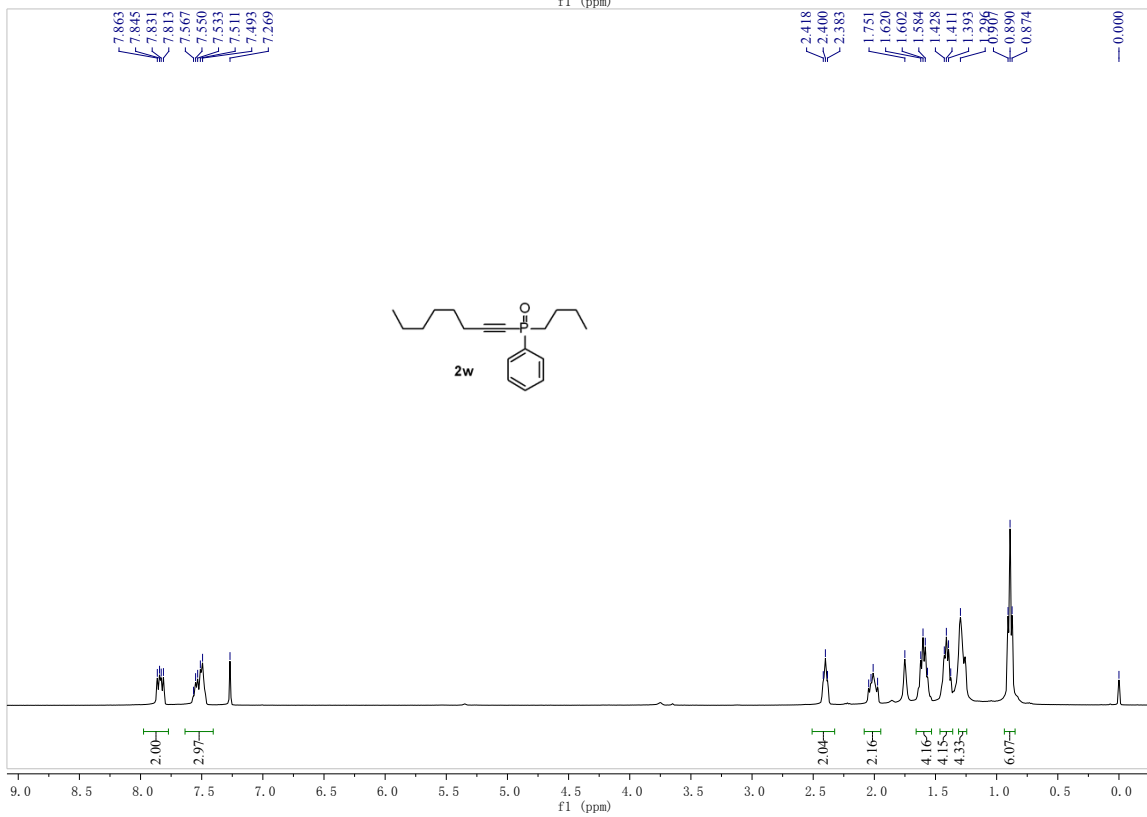



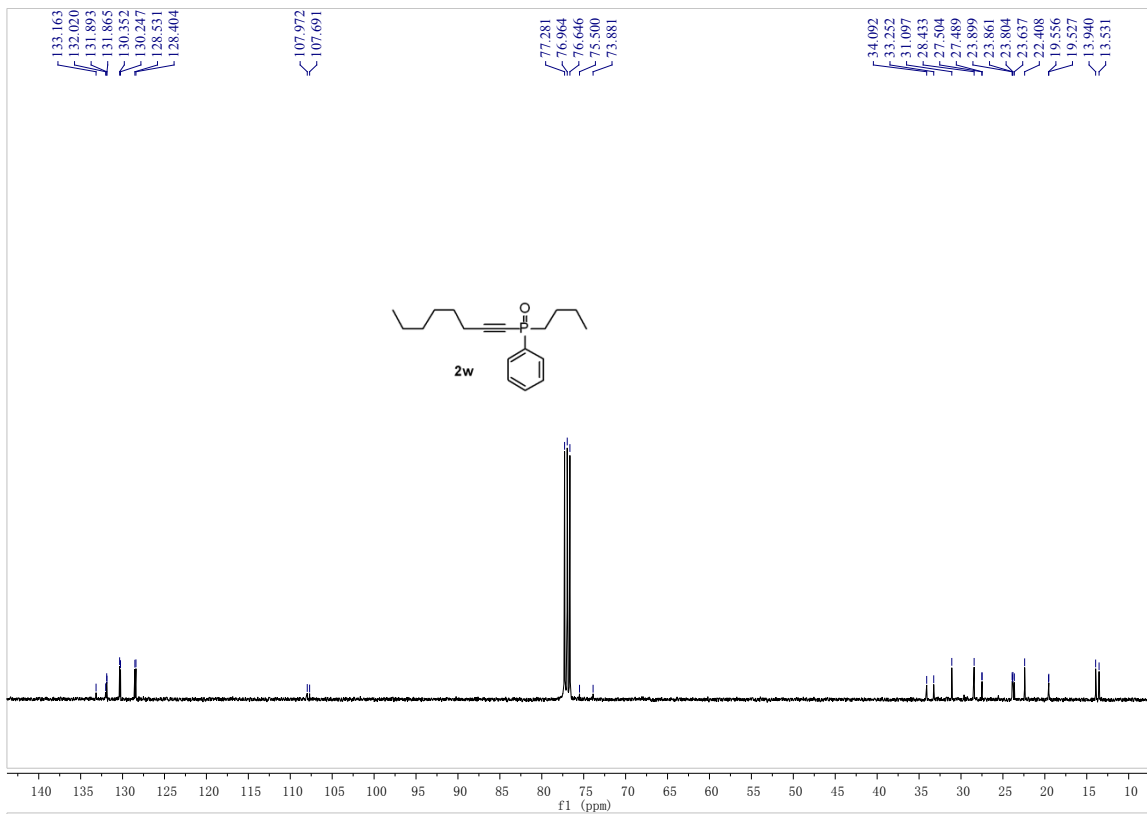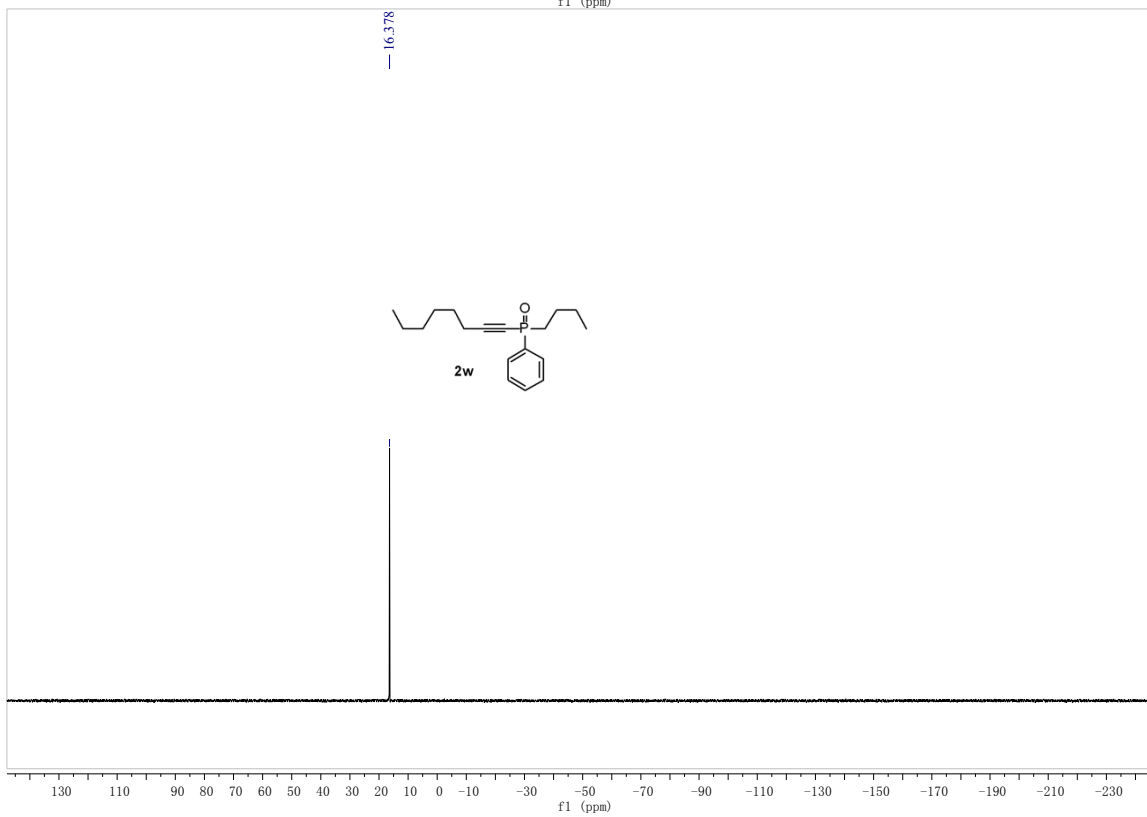

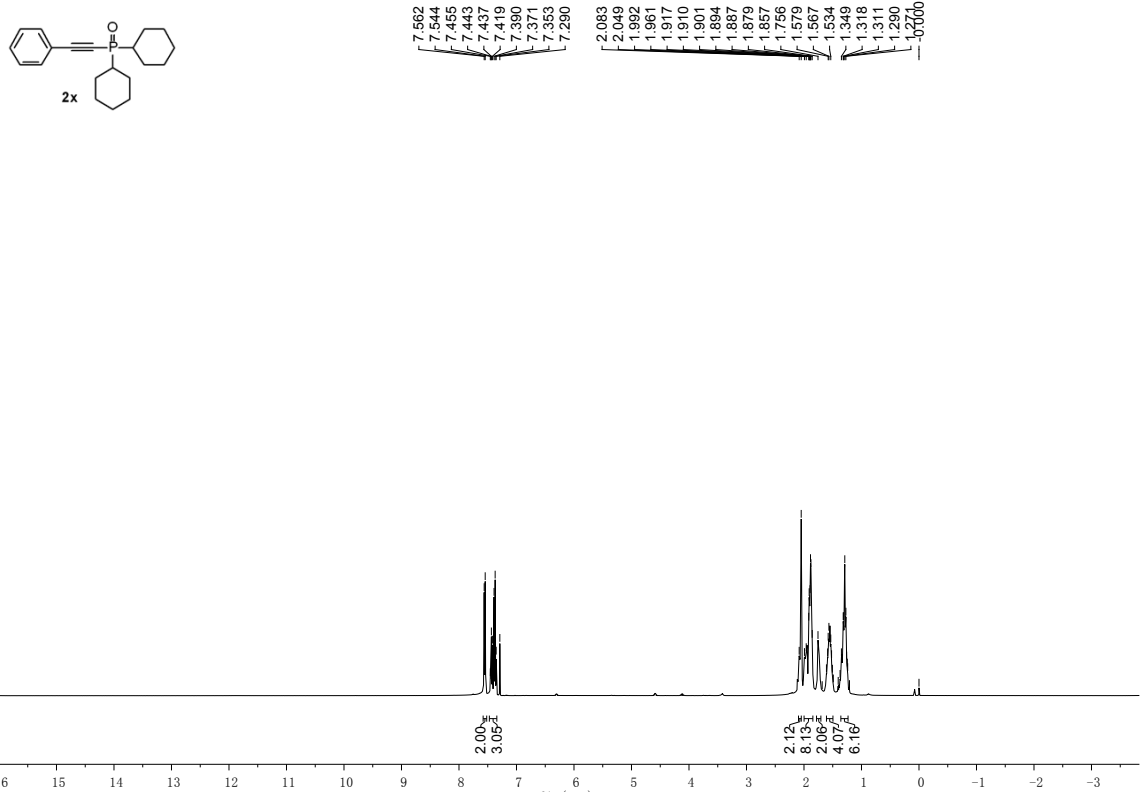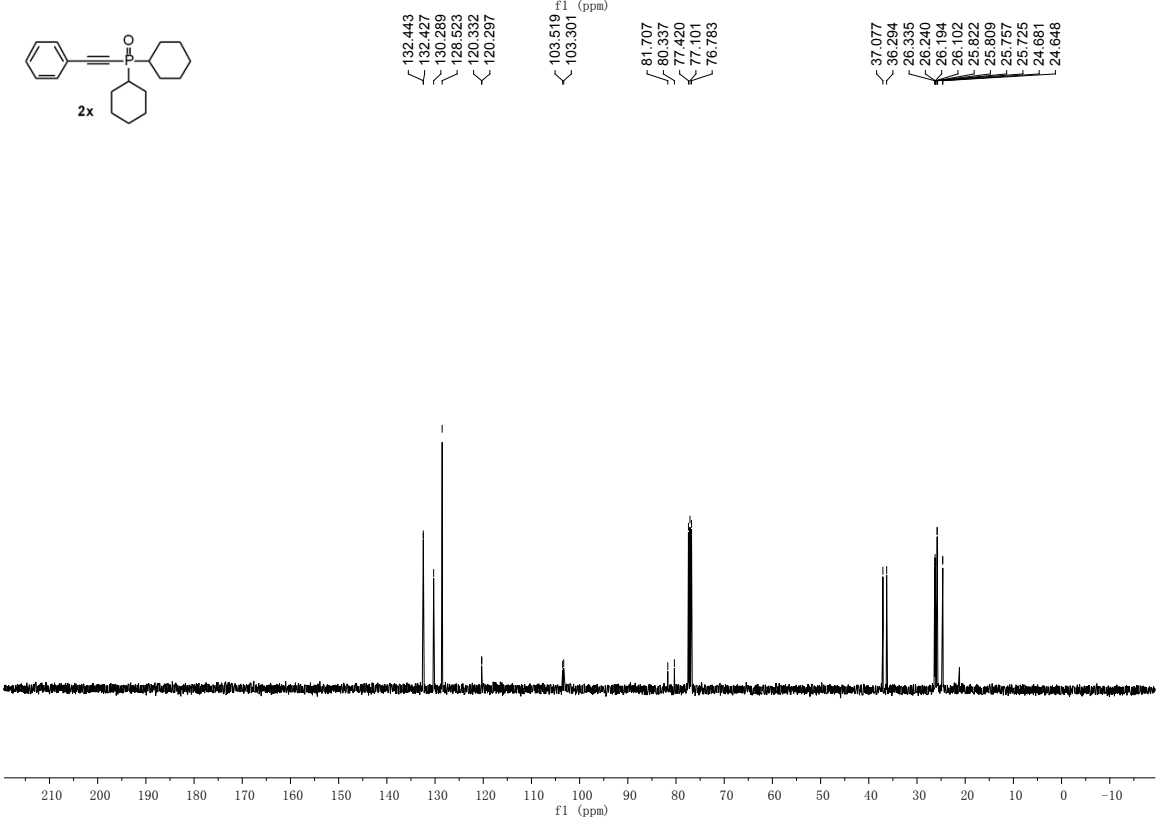

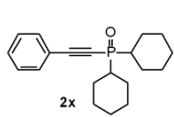

— 35.745

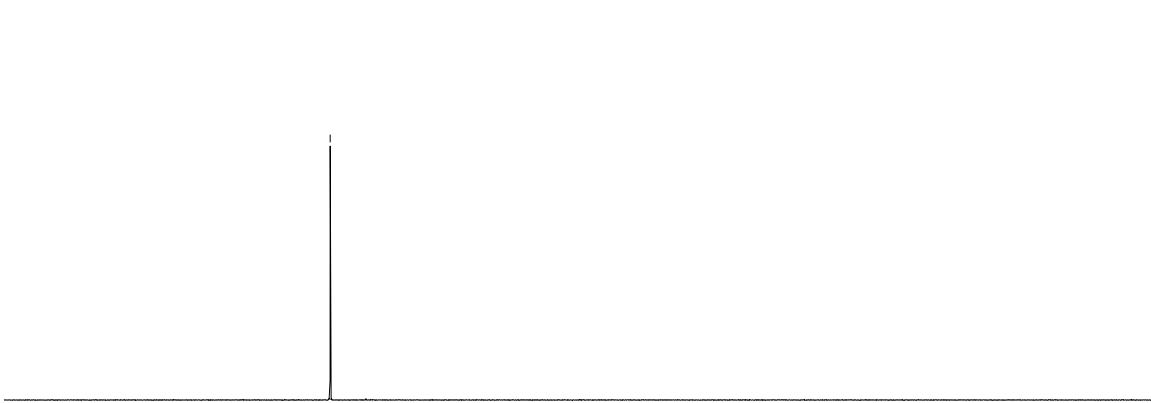

130 110 90 80 70 60 50 40 30 20 10 0 -10 -30 -50 -70 -90 -110 -130 -150 -170 -190 -210 -230  
f1 (ppm)

7.992 7.988 7.985 7.976 7.971 7.967 7.956 7.953 7.949 7.940 7.935 7.932 7.913 7.613 7.598 7.594 7.583 7.579 7.576 7.572 7.564 7.551 7.546 7.542 7.537 7.530 7.527 7.525 7.521 7.517 7.514 7.511 7.507 7.503 7.500 7.497 7.493 7.491 7.487 7.445 7.439 7.433 7.423 7.420 7.417 7.378 7.375 7.363 7.359 7.356 7.345 7.341 7.339 7.339 7.276 4.338 4.324 4.320 4.317 4.310 4.306 4.302 4.299 4.288 4.285 4.282 4.267 4.264 1.456 1.438 1.420 0.000

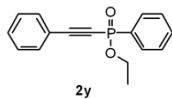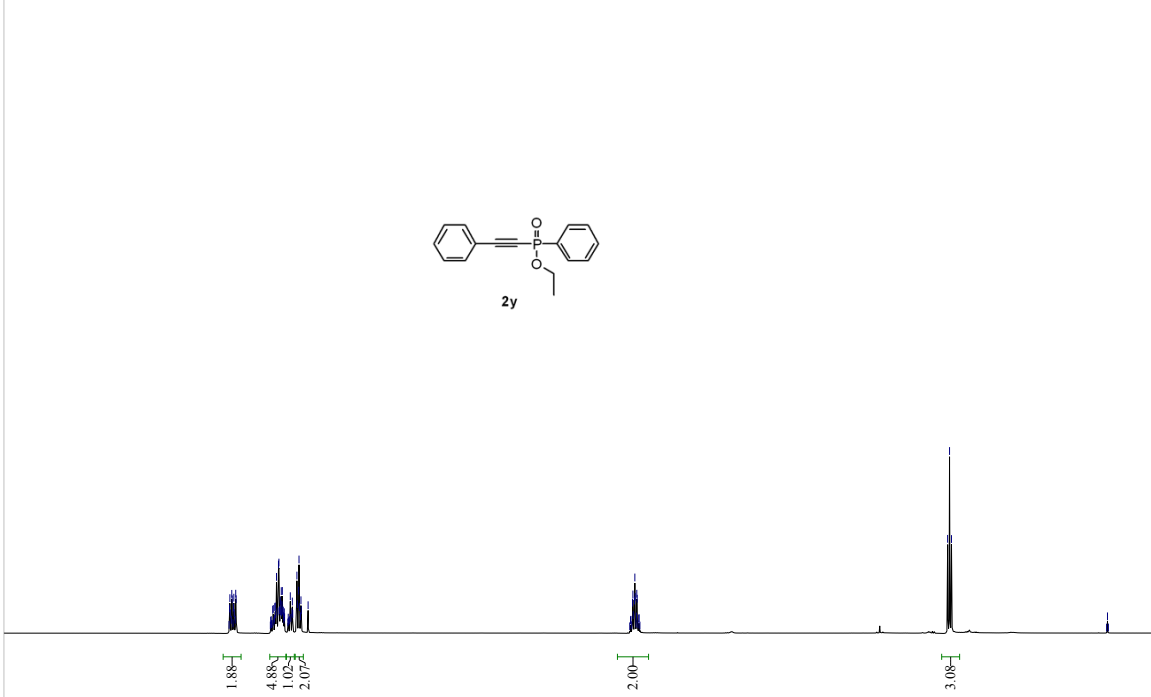

0.0 9.5 9.0 8.5 8.0 7.5 7.0 6.5 6.0 5.5 5.0 4.5 4.0 3.5 3.0 2.5 2.0 1.5 1.0 0.5 0.0  
f1 (ppm)

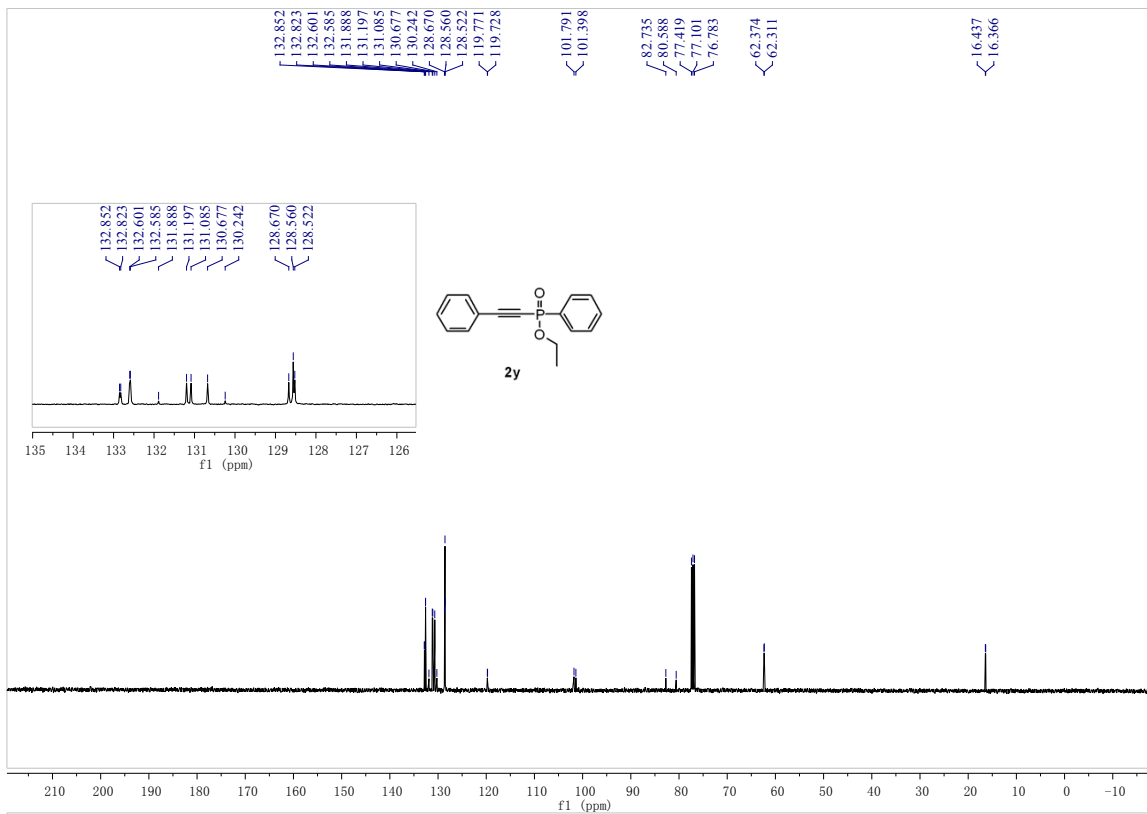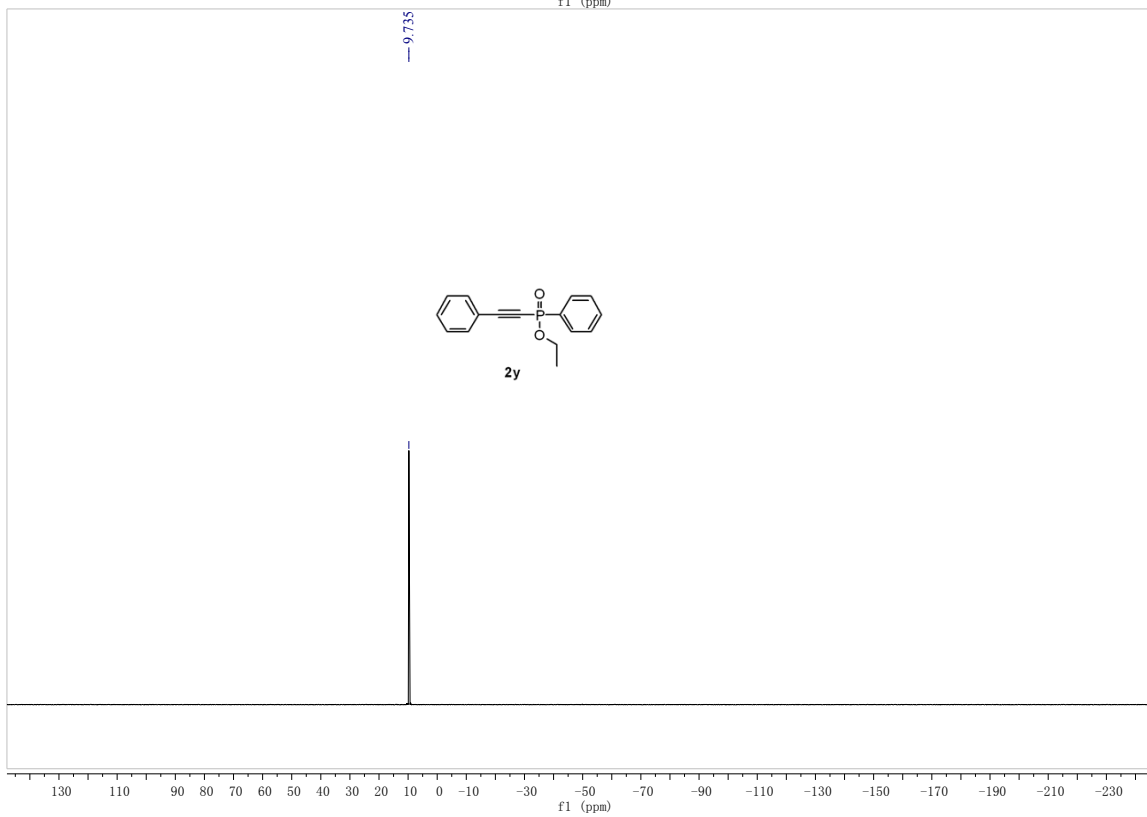

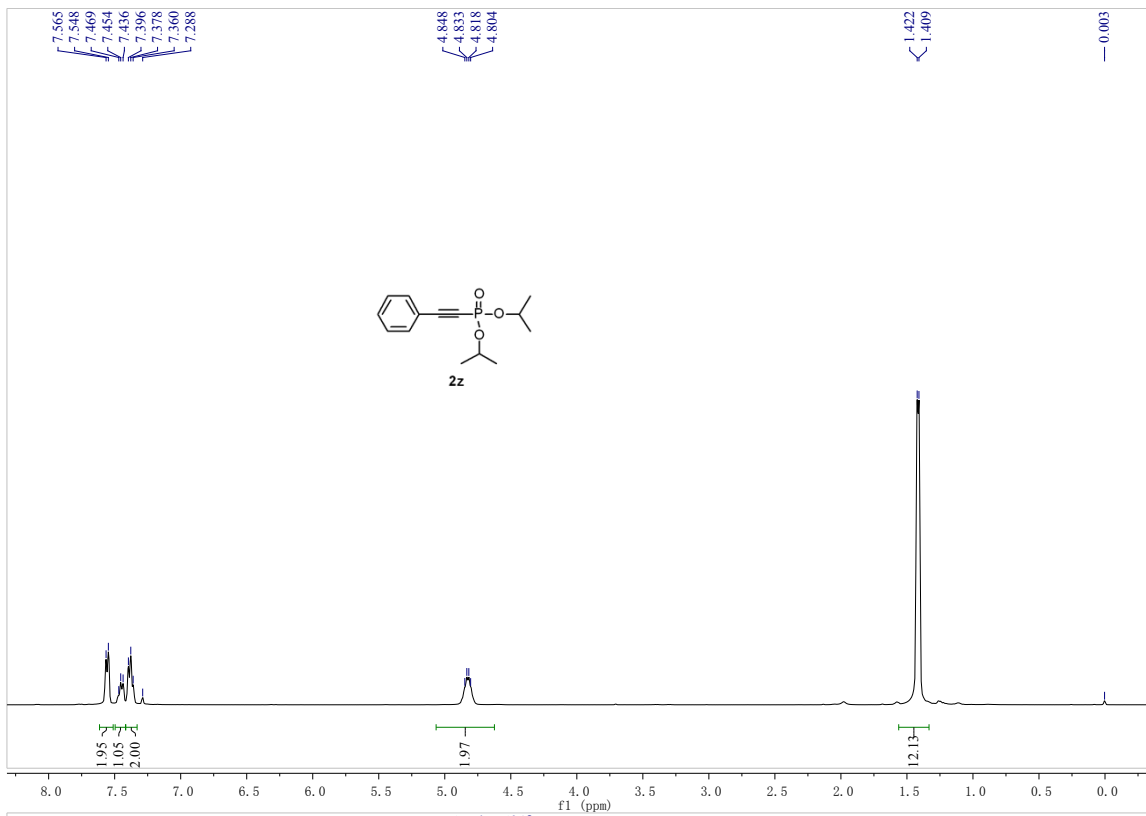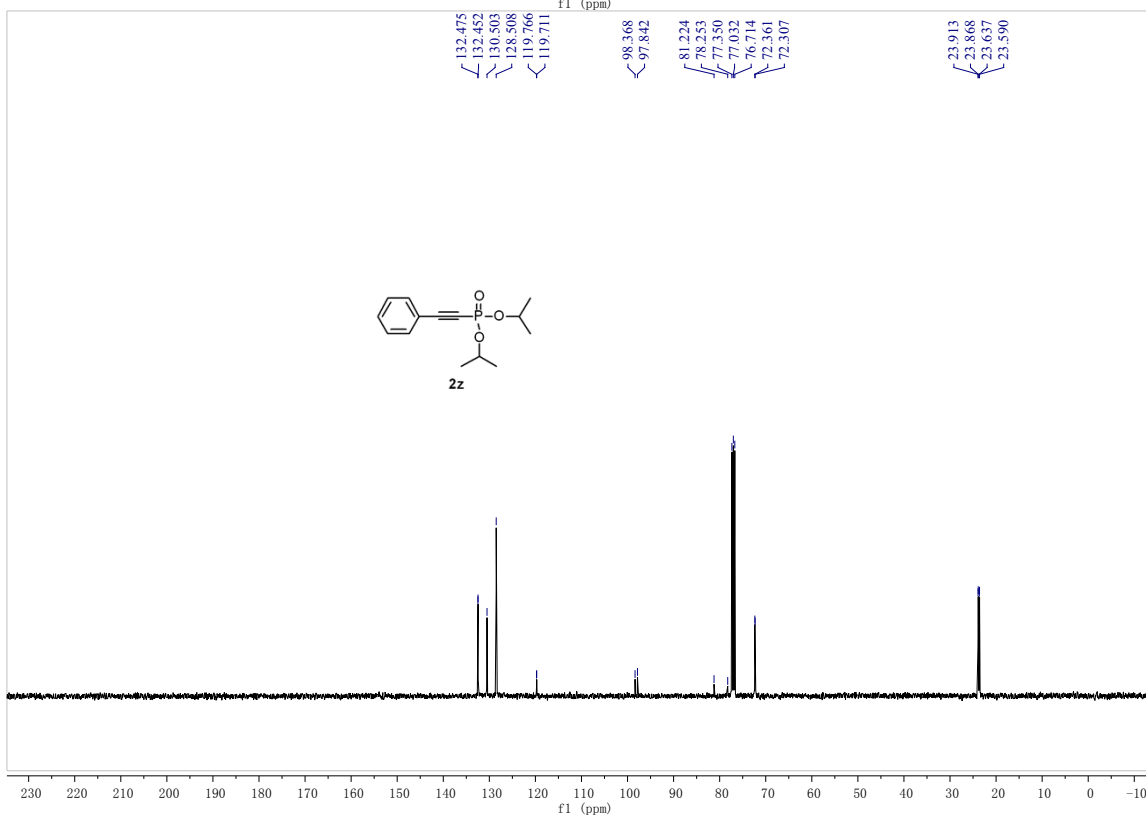

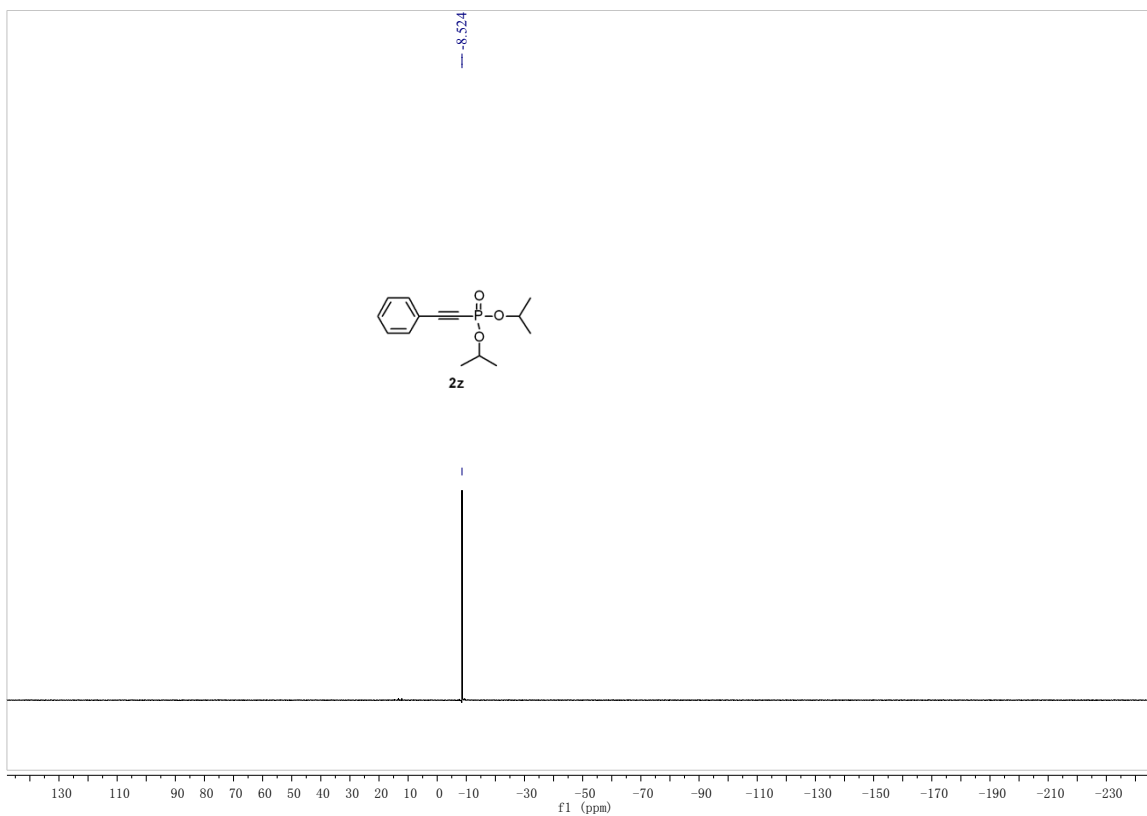

Supplement: c4cc09567g1.pdf [file c4cc09567g1.pdf]
